# Supplementary material for: Gain-of-function genetic screens in human cells identify SLC transporters overcoming environmental nutrient restrictions
Source: Life Sci Alliance. 2022 Sep 16;5(11):e202201404. doi: 10.26508/lsa.202201404 (PMC9481932; doi:10.26508/lsa.202201404)
Supplement: Supplementary file 1 [file LSA-2022-01404_TableS1.xlsx]

## Sheet: Transcriptomics conditions
Identifier	Media	Serum	Supplemented amino acids (AA) /Treatment
noAA	DMEM without amino acids	dialysed FBS	none
Recon	DMEM without amino acids	dialysed FBS	All 15 AA (fully reconstituted)
Arg	DMEM without amino acids	dialysed FBS	14 AA - No L-Arginine
Cys	DMEM without amino acids	dialysed FBS	14 AA - No L-Cystine
Gly	DMEM without amino acids	dialysed FBS	14 AA - No Glycine
His	DMEM without amino acids	dialysed FBS	14 AA - No L-Histidine
Ile	DMEM without amino acids	dialysed FBS	14 AA - No L-Isoleucine
Leu	DMEM without amino acids	dialysed FBS	14 AA - No L-Leucine
Lys	DMEM without amino acids	dialysed FBS	14 AA - No L-Lysine
Met	DMEM without amino acids	dialysed FBS	14 AA - No L-Methionine
Phe	DMEM without amino acids	dialysed FBS	14 AA - No L-Phenylalanine
Ser	DMEM without amino acids	dialysed FBS	14 AA - No L -Serine
Thr	DMEM without amino acids	dialysed FBS	14 AA - No L-Threonine
Trp	DMEM without amino acids	dialysed FBS	14 AA - No L-Tryptophan
Tyr	DMEM without amino acids	dialysed FBS	14 AA - No L-Tyrosine
Val	DMEM without amino acids	dialysed FBS	14 AA - No L-Valine
Gln	DMEM without amino acids	dialysed FBS	14 AA - No L-Glutamine
Gluc	DMEM without glucose & pyruvate	dialysed FBS	none
Vit	DMEM without vitamines	dialysed FBS	none
Full	DMEM	FBS full	none
Tor1	DMEM without amino acids	dialysed FBS	All 15 AA + Torin1 (100 nM)
