# Supplementary material for: Gain-of-function genetic screens in human cells identify SLC transporters overcoming environmental nutrient restrictions
Source: Life Sci Alliance. 2022 Sep 16;5(11):e202201404. doi: 10.26508/lsa.202201404 (PMC9481932; doi:10.26508/lsa.202201404)
Supplement: Supplementary file 2 [file LSA-2022-01404_TableS2.xlsx]

## Sheet: Suppl_Table_2_library
sgRNA_name	sgRNA_target	sequence
DIRC2_1	target_1551	GGGAGGCGGGGAGGCGGGGC
DIRC2_2	target_1323	CGCGGCCCGAGCCGGGCCGG
DIRC2_3	target_2425	GGGGTCCGCCCTCCCCTCCG
DIRC2_4	target_821	GAAAGGAGCCAGGTCCCAGA
DIRC2_5	target_789	GGAGAGGGAAACTCCCAGAG
DIRC2_6	target_2534	AGGGACCAGCGCGGCTGAGT
FLVCR1_1	target_1401	AGGCGGGGGAGGAAAGCGGC
FLVCR1_2	target_2119	GCGCACGCTGATTGGCCGGA
FLVCR1_3	target_322	GCCCGGAAGGATGCATGGCC
FLVCR1_4	target_2462	AAATGTCAGCCAGCGCTCGC
FLVCR1_5	target_1422	CTGGCTCTCGCGCCGGACAA
FLVCR1_6	target_1112	TAGGGGCGGGACCAGACAAG
FLVCR2_1	target_1317	CGCCCCGCCCCCGTCCTGCC
FLVCR2_2	target_1060	GGGGTGGAGTGGTGGCGGGG
FLVCR2_3	target_2823	CCCCCACGCCCCGGGCGCCA
FLVCR2_4	target_1744	GGTTGGGGGCGGAAGAAGCC
FLVCR2_5	target_349	ACTGCTCTGCCCGGAGGACC
FLVCR2_6	target_1145	AAGGCAAGAGACACTGGGTC
FLVCR2_7	target_1007	GAGCTAAGGGCCTTTTTCTT
FLVCR2_8	target_213	GAGGTCAAGAAAGAAAGAAG
FLVCR2_9	target_2061	GCTGGGCCACCAGAGCTTAC
FLVCR2_10	target_2403	AGGGAGGGGAGATATTCCAC
FLVCR2_11	target_1920	CACATATCACCTTAACCCTA
FLVCR2_12	target_828	TGAGTCATTCATAGGTGGGA
MTCH1_1	target_1703	GTCGGGGCTCGTCCTGCAGC
MTCH1_2	target_1282	CGCGGAGGGGATCGGGCTCG
MTCH1_3	target_1121	GGCCCAGATCCCAGTCGCCG
MTCH1_4	target_2388	GTTCTCTGCCCGCCCCTTTG
MTCH1_5	target_270	CATCTGGATTTGCTCTGGTT
MTCH1_6	target_2043	TGCGATCGGACAAAGAGGCT
MTCH2_1	target_2831	GCGAGGGGGCGCTGAGGTCG
MTCH2_2	target_1048	CCTGGTGAAGGGCGAGCCCC
MTCH2_3	target_437	GAAGAATGGGAGTGTCAGTG
MTCH2_4	target_2847	TCTCTTGCACATGCGCTTCC
MTCH2_5	target_702	GTTTCCGGACACTTGCGGCC
MTCH2_6	target_1691	CAGAGGCGCATGCGTTCTGC
SLC10A1_1	target_2761	CCAAGCTCCCTGACCTCTGC
SLC10A1_2	target_655	ACACTCAGTGGAGGGCAAAG
SLC10A1_3	target_1997	CTTGTCACTTTGCTGCTTCT
SLC10A1_4	target_2918	TTCTGGGCTGTTCCTCTTTG
SLC10A1_5	target_493	AGAGCTAGGGCAGGCAGATA
SLC10A1_6	target_875	AACTATCTGAGCTATTTCTC
SLC10A2_1	target_2446	TTAAGAAACTTCTAGGGTCT
SLC10A2_2	target_1773	GATACAGTAGCAAAACTACT
SLC10A2_3	target_1237	GGACACTACAAAGCAATTCC
SLC10A2_4	target_733	ACCTGATTTGCAACATAATT
SLC10A2_5	target_412	TGGAAATTGGATGGAGATCT
SLC10A2_6	target_2949	ACAGGGCACTCAACTATTCA
SLC10A3_1	target_1430	CCTTCCCCGCCCCGCGCGTC
SLC10A3_2	target_2786	GTGACGCGCCGGCGCGGGCG
SLC10A3_3	target_1489	CGGGTGAGCTGGTCGGCGCT
SLC10A3_4	target_712	TGGACGCTGAGGGGGGGGCG
SLC10A3_5	target_2490	CTCAACTCCGGCTGCTCGCT
SLC10A3_6	target_1504	CGCTGCCTGGACCAATCGCT
SLC10A4_1	target_1066	GCCTGCGGGGCGCGGGGCCG
SLC10A4_2	target_2295	CCGGGCGGCAGGGCGGGGCG
SLC10A4_3	target_2607	TCAGGTCTTTGTTCCGCCCC
SLC10A4_4	target_425	GAGCAGGAAAAAACCGTTCC
SLC10A4_5	target_2031	GCGGAGCCGGCGCAGCGATT
SLC10A4_6	target_1656	AGAGAACTTGATCGGCAGCC
SLC10A5_1	target_1905	GGTGTTCCAGTGACAGTCTG
SLC10A5_2	target_1284	CATCTAAGCAGCAACACAAC
SLC10A5_3	target_983	TTGTAGGATCAAAGTCCAGT
SLC10A5_4	target_651	TGAAAGAACATTCTTCATGC
SLC10A6_1	target_187	CAAACAAACTTGTTGTCAAG
SLC10A6_2	target_2225	GTGGTGAGTAAGAACAGAAG
SLC10A6_3	target_601	CTGATCAATTTTTTCACAAG
SLC10A6_4	target_456	GTGATGCTGACGACATAGCC
SLC10A7_1	target_1620	CGGCGGCCAGCCTCCCTTGC
SLC10A7_2	target_1215	CATCTGCACCTGCGAGCCCG
SLC10A7_3	target_2191	ACAAACGCCCCCAGCGCCTC
SLC10A7_4	target_964	TGAAATGAAGAACTCGGACC
SLC10A7_5	target_1662	CGCACCGCTGTCGAGACCTG
SLC10A7_6	target_1564	GGAACCTTCTGAATGACGAG
SLC11A1_1	target_562	TACGTGTGTGTGTGTGTGTG
SLC11A1_2	target_2757	ACGTACACACACACAGAGTC
SLC11A1_3	target_1749	CTTTCTTATTCTCTTTGATC
SLC11A1_4	target_2846	CAGAGGGGGGTGTGGTCATG
SLC11A1_5	target_1873	GACATGAATACGCAAGGGGC
SLC11A1_6	target_715	GGAGTTCCAAGACCCCTCGT
SLC11A2_1	target_15	CAGGGGCCGCCGCGTGCCCC
SLC11A2_2	target_10	GGCAGCATGCAGCTCCCGCC
SLC11A2_3	target_25	GCTGGAGTCCCTGCAGCGGC
SLC11A2_4	target_9	GTGGGCGGAGCCTAGGTCCC
SLC11A2_5	target_12	AGTCTGGATGCGGCGGCCCC
SLC11A2_6	target_23	GGTCTGCGGGCCACGCATCC
SLC11A2_7	target_2209	CCGTGCGGGGCTGTGAGGGG
SLC11A2_8	target_2551	AGGGGCGCGGGGCGGCTCGA
SLC11A2_9	target_440	GTGTGGCCAGGGAGGGCCTC
SLC11A2_10	target_2841	TGAGGGGAAGGCAAGGTCAG
SLC11A2_11	target_1212	AGGTGGTTGCGGAGCTGGTA
SLC11A2_12	target_2113	TGTGTCGGGGGTCAGGCTCC
SLC11A2_13	target_662	CAGCTTTCTAAAGACGAGCA
SLC11A2_14	target_1903	AATGCTTCTCTTTTCACGAC
SLC11A2_15	target_799	TGATTAGGCTTTGGAGGGCG
SLC11A2_16	target_231	CGCCTCCCTCAGTTAGATAA
SLC11A2_23	target_749	GGCTCTGTGTATTTCTGGCA
SLC11A2_24	target_515	CTTAAATATTGGGAAGCAGA
SLC11A2_25	target_2878	ACTGCAAAATGCAGAACTCA
SLC11A2_26	target_1791	GATGAGCCCTGCCATCACGA
SLC11A2_27	target_1494	TTTGATGGCTGAAGCAAACT
SLC11A2_28	target_1110	TGCCAGTACCCCGTGACCGG
SLC12A1_1	target_2088	CCTCAGGGCTAATGACCTGG
SLC12A1_2	target_2781	AACTTAAGTACCACATCAAC
SLC12A1_3	target_1235	GGGGCTTACAGTACTATTCC
SLC12A1_4	target_1208	AGAGATGACTGTGCAATGAT
SLC12A1_5	target_1174	TAGCTTTCAGCCAGAAAGTT
SLC12A2_1	target_293	GGCTGCGGCGGCGGCGGCTC
SLC12A2_2	target_537	GCCCACCCGCGGTCCCGCAG
SLC12A2_3	target_885	GGCAGCAGCACGCGGGAGGC
SLC12A2_4	target_1899	GCCGAGCGAGCGCGCGAGTG
SLC12A2_5	target_2248	CTGAGGGGCGGAGGAGCCTC
SLC12A2_6	target_395	GGCCCCGCTGTTTAAAGCCT
SLC12A3_1	target_1471	GGTGAGCAGGGTCCCCGGAC
SLC12A3_2	target_2166	CTCAGGGAGTGGCTGGCTTT
SLC12A3_3	target_1383	ATCCGCAAGGACACACAGGG
SLC12A3_4	target_1862	TGGAGATAGGGGACCCGCCT
SLC12A3_5	target_1846	ATCAAATGGTGTTCTGCCTC
SLC12A3_6	target_241	AGGTTGGCCTAAACCGCCCG
SLC12A4_1	target_21	TCGGGCCCGCCCCCAGGCCG
SLC12A4_2	target_27	CATCTGGGGCTCAGAGAGGG
SLC12A4_3	target_32	CCTGTGTGACCTCGGGTGAG
SLC12A4_4	target_4	CGCCCCTCGGGGGCGGAGAG
SLC12A4_5	target_29	TCGGCCGGCTCCTCCCAGAG
SLC12A4_6	target_26	CCTGGTGGCGGGAAGACCCC
SLC12A4_7	target_1738	AAAATGGGAGCTGGGACTGC
SLC12A4_8	target_2223	CCCACCTCCCGGCATGCCCC
SLC12A4_9	target_1062	GGGCGTCCTGCAGGGCAGCC
SLC12A4_10	target_2590	AAGCCCCAGGCCGTGGAGAG
SLC12A4_11	target_667	GTGGATTCCAGGAGCCTTCT
SLC12A4_12	target_2615	GGGTGGGTGTCGGACTGAGC
SLC12A4_19	target_1740	GCTCAGCTCTGCCTGCCCAC
SLC12A4_20	target_2504	CTGCATCCCCAGGATCAGCC
SLC12A4_21	target_806	CCTCCCAGGGTTAGGGAAGC
SLC12A4_22	target_2197	CCAAGGTGGGGCCAGCAGCT
SLC12A4_23	target_1277	GGAGGGACCTGGAGCTACAT
SLC12A4_24	target_312	CTCTCCCCAGAGGGTAGACT
SLC12A5_1	target_2322	CGGGTGGCACTGGGGAGCCC
SLC12A5_2	target_1227	GGGCGGGCGGAGGGGGTTGG
SLC12A5_3	target_2175	GCGGGCACTAGGACCCTGCG
SLC12A5_4	target_335	GCGCCGCGTCTCGCGGGGGG
SLC12A5_5	target_2805	GCCACTTCGCTGGGAGGCCC
SLC12A5_6	target_1536	GGCCTGAGGAGGCCATCTGC
SLC12A5_7	target_2982	GGGAGAGAGAAGAGAAGATG
SLC12A5_8	target_514	TGCTGAGAGGGGGCGCGCGC
SLC12A5_9	target_2387	GGTTTTGGGGGGAGAGCGGG
SLC12A5_10	target_1863	GGAGGCGTGAGCCACTGGCG
SLC12A5_11	target_387	GGCCCCCTTGCACAAAAACT
SLC12A5_12	target_2040	GGATTGCGTGGGTGGGATGA
SLC12A6_1	target_1105	TTTCAGCAGCTTTGGGAAGC
SLC12A6_2	target_1546	TCACGTGACCTACAGCCCTG
SLC12A6_3	target_1386	AACTGTTCTTGGGGTTCTTC
SLC12A6_4	target_2753	GTGAATTCTGTCCAGTCTCC
SLC12A6_5	target_1578	TTAATAACAATAAGCAAGGG
SLC12A6_6	target_1141	TGAATGATAAACACTGTGGA
SLC12A6_7	target_161	CGGGGAGGGGGCGCCAGCCC
SLC12A6_8	target_163	GACCTGGCCTCCCCCAGCCC
SLC12A6_9	target_160	AGGGAAGGGCTGCGGCGGCG
SLC12A6_10	target_43	GCGCGCAGGGTTCGCGCTGC
SLC12A6_11	target_73	CGGTAACTGTTTCAGAGCCG
SLC12A6_12	target_60	GGGCGCACCCCGTCGGGCCC
SLC12A6_13	target_2247	CCCCTCTGGTCCGGGGCTGA
SLC12A6_14	target_2798	GGAAAGAAGTCACACAAGAT
SLC12A6_15	target_2973	GGCTCAGTGCCATGGTCTCA
SLC12A6_16	target_2379	GATGCACTTTCTAGGACAGT
SLC12A6_17	target_1754	TAGGTAGCTCTTCATTCTGA
SLC12A6_18	target_763	TACAGCTCCCGTCGTGCCCC
SLC12A6_19	target_2765	CCTGCGCTCGCCGCGGGACA
SLC12A6_20	target_2547	AGGAGCAGCGCCCGCCCTCT
SLC12A6_21	target_1830	ACGCGGGTCGGGCCGTGCCC
SLC12A6_22	target_501	AGGGGAATAATCCTTTTCCT
SLC12A6_23	target_1871	GAGTGAGTGTGCAGCACAGC
SLC12A7_1	target_423	GCGGGGCGGGGCGGCTCGGT
SLC12A7_2	target_2477	GGGACTTGGAGGCAGGGGCG
SLC12A7_3	target_2499	GGCCCGCGGCGACTTCCTGC
SLC12A7_4	target_1324	GACCGCCGCGACCCGGGACG
SLC12A7_5	target_446	CAGGTGAAGTCACGTGGCCC
SLC12A7_6	target_2938	CCCGCGGCCCCACGAAAAGT
SLC12A8_1	target_461	GGACCCGCGCAGCCGAGCCG
SLC12A8_2	target_1159	CACCCCTGCCACGCCAGCAC
SLC12A8_3	target_741	GGGCAGGGCTGGGGGAAAAC
SLC12A8_4	target_1680	CCACCTGGGCCCGAGACTCC
SLC12A8_5	target_2417	CCCGCCGGGACGGGACAGCT
SLC12A8_6	target_2456	CCAGGTGAATGTTCTTGTCC
SLC12A8_7	target_2690	GGACAACAAGGGGAGAGGAG
SLC12A8_8	target_2642	GGGTTACCTTTTTGGTACCC
SLC12A8_9	target_644	ATTCTAGTAGAGAGAAAGGA
SLC12A8_10	target_1624	ACCTCATCTGGAAACTTGGC
SLC12A8_11	target_2394	AAGGACCAGCGGGATCTACC
SLC12A8_12	target_2756	ACAAGGTTTCTTCCTCAGCC
SLC12A9_1	target_1005	CCGTCCTCGGCCCCGCCCCA
SLC12A9_2	target_917	CGCGCGTGCTGGTGGGGGTG
SLC12A9_3	target_2095	AGCTGGAGCAGCGCAGGCTG
SLC12A9_4	target_1416	ACCCGCGGCCCACGTCCTGC
SLC12A9_5	target_500	AGAGAGGGTCGGGCTTCTCC
SLC12A9_6	target_1857	ATTGCATCCCCGGGCGCACG
SLC13A1_1	target_2437	AGTGAGTGAAGGTGACAGGC
SLC13A1_2	target_1164	TTAACATCTGCTTTATTTGG
SLC13A1_3	target_2298	GATTTCTCATGAAAAGTCTT
SLC13A1_4	target_1074	CACAATTAACATGAAGAGAT
SLC13A1_5	target_2737	AACTTGTGTTGGTCGGTCTA
SLC13A2_1	target_2431	GGAAGGGAGAGGGAGAAGGA
SLC13A2_2	target_396	CAGCCAAGCAGGCAGGTGGC
SLC13A2_3	target_2065	GAGTTGGGGAGGTGAGAGTA
SLC13A2_4	target_2407	AACACTCTGATTGCCAGACT
SLC13A2_5	target_1300	CCACAGGCGGAGTAAAGATC
SLC13A2_6	target_229	GTCAATGGTTAACACTCAAC
SLC13A3_1	target_63	CGCCCTCTCCCTGCTCCTCC
SLC13A3_2	target_76	AGCCTGGGGGAGGGTCGGGG
SLC13A3_3	target_127	AGGCACCACCCTTTTCCTCC
SLC13A3_4	target_169	GCAAACGGGACCCCAGCCGC
SLC13A3_5	target_51	CCCCTGGGACCGGGTGAAAG
SLC13A3_6	target_108	CGGGAACGTTGGAGAAAGTT
SLC13A3_7	target_94	TGAGTTCTCACGAGATCTGA
SLC13A3_8	target_89	TCGCTATCACGAGAACAGCA
SLC13A3_9	target_58	GAACAATTCAAGATGAGATT
SLC13A3_10	target_55	TGACATGGGAGGGACCCAGT
SLC13A3_11	target_137	AGGGGCTTTTCCCTCTTGTT
SLC13A3_12	target_75	ACAGCCAAACCCTATCAACT
SLC13A4_1	target_2571	TCTCTGTCCCGGCTTCCCAT
SLC13A4_2	target_2430	CCGCTCTTGATTGGTCACAG
SLC13A4_3	target_202	TGAGTCAATTTCTCTCCCCG
SLC13A4_4	target_633	GATTGGCTTTGAGAAGTGGG
SLC13A4_5	target_2902	GGTGGATGAAAGTTAAAGGT
SLC13A4_6	target_1453	TGATAAAAAGGAATGTCTTG
SLC13A5_1	target_846	GGGGCGCCTCCCCGCGGCCC
SLC13A5_2	target_1752	CCGAGGGGTGGCCCCGCCCC
SLC13A5_3	target_1826	AGACGCCTCCCACCGCCGCC
SLC13A5_4	target_2720	CTGCCCCCAATTCTGCCACC
SLC13A5_5	target_1266	GGTGACAACTCCGCCCCGCA
SLC13A5_6	target_272	AGAGGGCTGGCCCGAAGCGT
SLC14A1_1	target_2509	CGGCTTTCTCCTCCCACTTC
SLC14A1_2	target_579	ACATCGGGTACTGAAGCCAG
SLC14A1_3	target_1326	GGAAACTGTGGCAAAGCAGT
SLC14A1_4	target_2844	CATTTTGGTAGGATTATTGC
SLC14A1_5	target_808	TCAAAGACCTTGGAATGCTG
SLC14A1_6	target_366	TCAATGCCAAAGCAACACCA
SLC14A1_7	target_2314	TGCCCCACAGCAGTTTCCCT
SLC14A1_8	target_2897	CTTCTCACATTTCATAAACA
SLC14A1_9	target_1354	TCTGAGGTTGCTTCTTCCAG
SLC14A1_10	target_1369	GGGACCAACACCAAAGCAAC
SLC14A1_11	target_2891	AGATTGTGAGGGCTGCATCT
SLC14A1_12	target_2324	GGTTCATGTTCTGACACGTT
SLC14A2_1	target_2887	CAGTTTTCACAATTCTGTAT
SLC14A2_2	target_2020	CAATGGCTGGAGCCAGCCTA
SLC14A2_3	target_1887	GGCACTATGGAGCAGAAAGT
SLC14A2_4	target_327	GGACTAAAGTGAGTGTATGT
SLC14A2_5	target_921	ATCCCCCACTAGATGGCGCC
SLC14A2_6	target_1641	AGGTCCTAATACAGTACCAA
SLC14A2_7	target_2970	GGAGAAATTGGCCAAAACAA
SLC14A2_8	target_1750	CACGCAAGTCCAAAATCCAG
SLC14A2_9	target_736	GATATGAGACATGGAGTCAA
SLC14A2_10	target_2408	ATAAATGCTCCCATTTCAAA
SLC14A2_11	target_2812	TAGTTACTTCCAAGATACAG
SLC15A1_1	target_1454	TCCCCGCAGCACCGCCCCCC
SLC15A1_2	target_1854	GCGGGGCCGCCGGCTCCACC
SLC15A1_3	target_2171	CACCAGCCCCGGCCCAGGTG
SLC15A1_4	target_874	CGCGCGACGGCTCGGGAGCA
SLC15A1_5	target_1787	TGGGCCCCGACGGGAGCGCG
SLC15A1_6	target_2049	AGGCCCGGCCCCGTTGCCCC
SLC15A2_1	target_1083	GCATTGTTTCATTCTGTCTT
SLC15A2_2	target_797	AGTTTTTCAATCTGTGCTCG
SLC15A2_3	target_680	TATAGCTTCCTGCTTTGCTC
SLC15A3_1	target_2552	GAGGGGAAAGGGAGGCGGAG
SLC15A3_2	target_2131	TCTCCCTTCCCCCACCCCTA
SLC15A3_3	target_1152	GCTGCAGGAGAGGCGCGGGG
SLC15A3_4	target_340	GGGAGGAGAGGGGAGAGTTA
SLC15A3_5	target_1050	GCAGCGAAGTGAAGCAGGGA
SLC15A3_6	target_1952	GCGAGGAAGGGTCAAGGTGG
SLC15A4_1	target_1103	GGAACTTCCGGCCCCGCCCC
SLC15A4_2	target_1672	CCACCTCCTCGCCTAGTGCC
SLC15A4_3	target_2142	CAGTCTCGCGAGAAGGGCGG
SLC15A4_4	target_2824	GAGCTTGGGATTCCGCAGCT
SLC15A4_5	target_1021	GCGAGTGGGGCGTTGAGCAG
SLC15A4_6	target_2480	CACGCAGTGATCCAGAATAC
SLC16A1_1	target_2434	GCGCATGCTCCGGCCCCGGC
SLC16A1_2	target_594	GAAGGACGGGAGCCGGACCC
SLC16A1_3	target_1888	GCTGGAGTTCCACGGGGCCC
SLC16A1_4	target_2328	TGTGCGTGACGTGGTGGCGC
SLC16A1_5	target_2522	ATAAGGCAGCCTCGCTGGCC
SLC16A1_6	target_2313	ACGTGACTGGCTAGCTGCGT
SLC16A1_7	target_1102	GAGGGGGCGCCGGCGCGCGC
SLC16A1_8	target_861	AGCTCCGCGCCGCTCAGCAG
SLC16A1_9	target_2564	GGGACGCCGGTCACGTGGCG
SLC16A1_10	target_699	GCGCAGCGCGCGGGTCGGAC
SLC16A1_11	target_804	AGGGCGAGTCTGGCAGGGCG
SLC16A1_12	target_1882	GTCCCTGTCTGACGAGCTCT
SLC16A10_1	target_1192	CCCCCAGCCGGCGGGGCGGG
SLC16A10_2	target_2548	GTGGGGGCACGTCCCGCTCC
SLC16A10_3	target_1461	TGGGCTCAGTCGGGGGTGCG
SLC16A10_4	target_2791	GCTGGCGCGCGCGAACACCT
SLC16A10_5	target_307	TGCTTTTAAGAACCGGCGGC
SLC16A10_6	target_2645	GCCTCCAGATGATTGGGCCT
SLC16A11_1	target_2917	TCGCCGCTCCCCCCTCCCCC
SLC16A11_2	target_634	CCACAGGGGCCTGAGCCACC
SLC16A11_3	target_1325	ACACACACAACCCCCAGGCC
SLC16A11_4	target_1741	CTCCGTACACCCCGCGTCCC
SLC16A11_5	target_2879	TGGCCTCACGCGCGGCTTGC
SLC16A11_6	target_2854	TAATTCAATCCCCGTGGGAC
SLC16A12_1	target_487	GGTGAGGAGGCGGCGGGGCC
SLC16A12_2	target_1646	GGGCGGGCGGGGCATGGGGG
SLC16A12_3	target_1388	GCTCGGCGGGTGCGCCCCGG
SLC16A12_4	target_853	CTGGGGGCGGGTGTGGCAGG
SLC16A12_5	target_263	GGGCTGCAGTGGTCCCGGCG
SLC16A12_6	target_1694	CTGGGCGGGCTGCAGAGCGC
SLC16A13_1	target_1835	GTGTCCGGGCCGGGCCACCC
SLC16A13_2	target_621	CGGGCAGGGGCGGAACGAGA
SLC16A13_3	target_700	CCAGAGGGTGGAACTGAGTT
SLC16A13_4	target_1841	ACTGGCGCGCTCCAGGGGTG
SLC16A13_5	target_906	GATGATCTATTTTATCACTG
SLC16A13_6	target_2279	GGAGCTCGCCAATGAGGACG
SLC16A14_1	target_2546	TTCTCTCTCTTTTAGAGACA
SLC16A14_2	target_751	TGCTAGTCTCACTTGCATCC
SLC16A14_3	target_2763	TAGCCTCCATTTCTCTGAGA
SLC16A14_4	target_1251	GACCCTCACTGAAATATTTT
SLC16A14_5	target_1193	AAGGGACTTTGAGTCCTCTT
SLC16A14_6	target_1728	ATAAATGTGCAGCGCCTTAG
SLC16A2_1	target_1085	GGGGGGTGTGGAGGAGGGGG
SLC16A2_2	target_1020	AAAAGGAGGAGGAAGGGCTG
SLC16A2_3	target_1563	GAGGAGGAGGAGAGGGCTCG
SLC16A2_4	target_2264	CCTGTTGAGGGAGGAAGAGG
SLC16A2_5	target_2116	GAGAGAGATGACATGGGGAG
SLC16A2_6	target_1067	GGAGAAGAGCGAGGCTGTAG
SLC16A3_1	target_2782	GCCGCGAGAGGGGCGGGGCA
SLC16A3_2	target_2957	GGGCGCAGGGCTGGAGTCGG
SLC16A3_3	target_2181	GGCGAGGGCTGCCCACCCGC
SLC16A3_4	target_1262	CAGAACCCGACGCGGAGGCC
SLC16A3_5	target_1447	GTTTTCTCTCATTTGCAACA
SLC16A3_6	target_2675	CCCGAAGGTGGGAGCCGCCC
SLC16A3_7	target_2699	AGGCGGCGCGGGGTCCGGGC
SLC16A3_8	target_1225	GGGCGCGCAGGGGCGGCGCC
SLC16A3_9	target_1239	GGGGGTCCCTGGGCCCGGCG
SLC16A3_10	target_2108	CCCCCGCGCACGTCACCGCC
SLC16A3_11	target_2067	CTGCGGCCCGGGAGCCCGTC
SLC16A3_12	target_597	GACGGGGCCGGTTCCGGTTG
SLC16A3_13	target_2716	ACTGAGGGAGGCCCCTCCCC
SLC16A3_14	target_378	GACCAAGGAAGCGGCCTCTG
SLC16A3_15	target_2062	CCTGCCTTTGTGGCCCAGGC
SLC16A3_16	target_248	AGGGCGGGAGGGCGCTGCAC
SLC16A3_17	target_189	GGCCAGCGCCTGGCTGCCGA
SLC16A3_18	target_1476	AGGGTAATTCGTTTCCTTCC
SLC16A3_19	target_2424	CCACCCCCACCCCCTTTCCT
SLC16A3_20	target_1792	CGGGGGACCCACCGGGTCAG
SLC16A3_21	target_460	TCTGCGGACACGCTTGCAGG
SLC16A3_22	target_848	CCCACAGATTGCGTCGTGGG
SLC16A3_23	target_1516	TGTAACTAAAGGCATGCACA
SLC16A3_24	target_1559	GACTCTCCCAGCAAAGGTCC
SLC16A3_25	target_1286	CGGGTCAGCCAGAGCGAGCC
SLC16A3_26	target_1351	CTAAAGGGCAGTGGCTTTTT
SLC16A3_27	target_2172	TGTCGGGGGCTGCTTGTCCC
SLC16A3_28	target_393	CCAGGACTCAGATTACCTCC
SLC16A3_29	target_2955	CCTGGCCGTCATTTCTGCCC
SLC16A3_30	target_2217	GACCACGCACACCATGATTC
SLC16A4_1	target_2372	AGTGACTGTGGGTGGAGGGA
SLC16A4_2	target_767	CAAGCATGAAGTAAACTAAG
SLC16A4_3	target_2793	TCCTTTTGGCGACTATGCTC
SLC16A4_4	target_2111	ATGTTGTGAGAAGTTCCCTG
SLC16A4_5	target_2890	AGACAAGTGTATGAGAGCTC
SLC16A4_6	target_1614	AAGGTAGAATTTTTTGCCGC
SLC16A5_1	target_2874	GCCTTCCCCACCCCACTTCC
SLC16A5_2	target_735	GTTTTCCCGGCTCAGGGTCT
SLC16A5_3	target_1619	ATTGGAAGGGCTCCTGGGCA
SLC16A5_4	target_747	TTATCTCCGCCCCAAGCCCG
SLC16A5_5	target_2148	GGCGCAGCCCTCAAAGCTCG
SLC16A5_6	target_1856	AAGAAGGGATCCTCAACCTC
SLC16A5_7	target_745	GGGCCAGGATGCGGGAGGGG
SLC16A5_8	target_258	GGCCAGGCAGGGCGGGCCCA
SLC16A5_9	target_648	GACCCACCTTCCAGCCTCCC
SLC16A5_10	target_2967	GGCTCCGGACGCAGGCGCCA
SLC16A5_11	target_2834	GCCGGGGACAGTCCAGCAGC
SLC16A5_12	target_845	GGGATTCCGTCGGGTGGGGA
SLC16A6_1	target_1586	TGGGGGGCGGGGGGAGGGTG
SLC16A6_2	target_2593	GCCCGGGTCGCAGGCGGCCG
SLC16A6_3	target_1303	CCCCCGAGGCCGGCGGAGAC
SLC16A6_4	target_2915	TAGGCAGCGACGCGGGGCCG
SLC16A6_5	target_968	GGCGCGGGCGGCAGCACGCA
SLC16A6_6	target_1518	GGCTCGGGTGCCCGAGTCGC
SLC16A7_1	target_862	GGGAGCCGCCTCCCGGTGCC
SLC16A7_2	target_2687	GAGGCCGGCCCGGGGGGTGG
SLC16A7_3	target_1991	GGGGGCCGGACAGGCTGCGG
SLC16A7_4	target_2708	GGAGGAGCGCGCGCCAGGGG
SLC16A7_5	target_971	AGCATGCTCAGTCGGTCTCC
SLC16A7_6	target_2120	GTCAAAACTAAAATCCGAAG
SLC16A7_7	target_791	TTGAGTGACAAAGAGATAGA
SLC16A7_8	target_2525	CTCAAGTGAGCTAGGGGAAG
SLC16A7_9	target_1403	TAAATGCCAACTCTGAGAAG
SLC16A8_1	target_526	GGTGCTGGACGCCCACCTCC
SLC16A8_2	target_2114	GGGGCAGATGCCGGCTGCAA
SLC16A8_3	target_766	AAGGCGTCGGGAAGTGGAGC
SLC16A8_4	target_956	GACAACAGAACAAACAGCAG
SLC16A8_5	target_190	AAGAGGAAAATCACGCACAG
SLC16A8_6	target_1308	TCACGCGTACGGGGCGACTT
SLC16A9_1	target_2383	GGAGGCGGAGGAGATGGAGG
SLC16A9_2	target_1938	GCGCCTGCTCCCGCTGCTCC
SLC16A9_3	target_2132	CACTGCCCGAGCCGCGGCCC
SLC16A9_4	target_668	TCCCTACTCCTGGCCGGGCC
SLC16A9_5	target_1294	CCGTCGGCCAGGCGCCCTCT
SLC16A9_6	target_1109	GCTCCAGGCCTGGTAGGGCC
SLC17A1_1	target_1677	ACTGGCAGATTCCCAGTTTC
SLC17A1_2	target_932	TACCTTTTCCTTAAAGCTTC
SLC17A1_3	target_2892	CACAGTGATGTCAAAAGATT
SLC17A1_4	target_1910	TGTGGGTCAAAATCATCCAG
SLC17A1_5	target_2099	ATGATTTATGGGGCTAAACT
SLC17A2_1	target_183	GTAAGTTATAGAGCTGTGTT
SLC17A2_2	target_2262	GAGGAGGCAACATTAACAAG
SLC17A2_3	target_2350	AGGATTGTTAAAAGGAAATC
SLC17A2_4	target_2261	GGGCACTACTGGTATGCTTT
SLC17A2_5	target_2330	GAAAGCAAGGGGGCATGGTG
SLC17A2_6	target_1653	AAAAAGGCTTGTTGACTGAA
SLC17A2_7	target_1670	AGGGCTCCTGAAATCAGTGA
SLC17A3_1	target_1507	AACTGCAGAGGGGATTGGGC
SLC17A3_2	target_2501	TGAGGATTCTTTGCCACCCT
SLC17A3_3	target_1125	ATGCTTCTTCAAAGCCTATT
SLC17A3_4	target_1182	AACTACAAAGTTGACTCAGA
SLC17A4_1	target_606	ACATAAGGGCTAAAGGTTTT
SLC17A4_2	target_1906	TCATGCTTCAAGCCCAGCTG
SLC17A4_3	target_886	TTAAGGATGAGGGAAGACAT
SLC17A4_4	target_1925	ACCAGCTTGGAGAATTTTAT
SLC17A5_1	target_1540	CGGCGGGGGCGGAGTCGGCG
SLC17A5_2	target_1909	GTCCCCGCGGTCCCGCCCAG
SLC17A5_3	target_198	AGTGAGCCCGCTCCGCCCGC
SLC17A5_4	target_994	GGAGTTCTGGGAGTTCTCGT
SLC17A5_5	target_2064	CTTGGGTTGGACTAGGGAAG
SLC17A5_6	target_1987	GCTCCCCGGCATGCGTAGAC
SLC17A6_1	target_2540	GAACAGCAAAGTCAAAAGAA
SLC17A6_2	target_1129	GGAGGAGATCATGGGCAGAG
SLC17A6_3	target_1648	AAAATGGTGTCTTTGCTGTA
SLC17A6_4	target_1824	CAGAGCATATTCAAAACTCA
SLC17A6_5	target_2156	CCGGAATATCACAGAAGCCT
SLC17A6_6	target_2670	CAGACTTACGCTGGCGTGAT
SLC17A7_1	target_2856	GGCCCCGCCCCGGCCCCACC
SLC17A7_2	target_1331	TCAGCGCCGGGGGCGGGGCG
SLC17A7_3	target_2559	GCTCAGGAGGGGACAGGACG
SLC17A7_4	target_1358	GACAGACGAGGGGAGGGGCC
SLC17A7_5	target_710	AAAGGGCTGCGAGAGGGGGC
SLC17A7_6	target_1602	ATTGGGGGGCGTGAACTCGG
SLC17A8_1	target_1510	GCGCAGCCTCTCTCCCTCCC
SLC17A8_2	target_793	AGCTGGGGTGGGGCAGGAGG
SLC17A8_3	target_193	AGCGTCCCCAGCTGCAGCCC
SLC17A8_4	target_1876	ACGCGGCTGGCTGGAGGGGC
SLC17A8_5	target_2632	TCTCAGGACTCCTGGTGGTC
SLC17A8_6	target_2044	TAGGCCACGGATACTGCTGC
SLC17A9_1	target_2674	GGGTGGGGCGGGCACCCGAG
SLC17A9_2	target_1687	GGGGCTGAGCCAGGGCGCGT
SLC17A9_3	target_1207	GGGGATTCCCAGCAGCAGGC
SLC17A9_4	target_2308	CAGTCAGGGCGACCCAGCCA
SLC17A9_5	target_966	GCCCCCACACTAACCTCTGC
SLC17A9_6	target_2910	CAGCAGGGACCGACGTCAGC
SLC18A1_1	target_980	GGGCTGGAGAGGATAAAGAG
SLC18A1_2	target_2535	TCCCTGCGTCAAAGGCAGGA
SLC18A1_3	target_1926	AGGTTGCAATTAAATCTTTG
SLC18A1_4	target_1484	AGATATTAGCCTAAGCAAAG
SLC18A1_5	target_528	CGAACTCTTTAACTCTTGCC
SLC18A1_6	target_687	AGGGTCTGAATGAACCCTGT
SLC18A2_1	target_222	GGCGGGGGGCTGGGGCGCCC
SLC18A2_2	target_2980	GGCGCGGGCGGGCGGAGGCC
SLC18A2_3	target_2979	CCGGGGAAGAGGCGCGGCCG
SLC18A2_4	target_2561	CCGAGGCGGGGACAGGGAGG
SLC18A2_5	target_2415	GGGACCCAGGCCTGGGGAAG
SLC18A2_6	target_1723	CAGCGCGTGGCCGAGTGCCT
SLC18A3_1	target_1832	GGCCGGGGGCGGGGCGTGGC
SLC18A3_2	target_2445	TGCTCCAGGGCTGGAGGCCC
SLC18A3_3	target_1711	CGCCGCGTCACAGCCCCGAG
SLC18A3_4	target_772	CTGGAGAGCGGACCCCTGCC
SLC18A3_5	target_1652	TCCACACCGAGAGCCCTTCC
SLC18A3_6	target_1459	CCCAGCCCCCGAGTGGTGCC
SLC19A1_1	target_1858	GGCGGGGCCTCGCGCGTGGC
SLC19A1_2	target_1071	GACGCTCCTGCCGCAGCGCC
SLC19A1_3	target_2299	CCGGGGCTGGGAGACGGCCG
SLC19A1_4	target_1433	GTGACCGGGTGGGGAGAGGC
SLC19A1_5	target_732	GGGTGGGAGGGTGCCCCGTG
SLC19A1_6	target_595	GAGGGGCCGCGTGACCCCGG
SLC19A1_7	target_2832	AGGAGCGGGAGGGCTCTGGG
SLC19A1_8	target_305	AAGGCTGAGGAAGAGGGAGT
SLC19A1_9	target_1161	GGGACGCAGGTCACAGCTCT
SLC19A1_10	target_2711	TCCCCCAGCAGCCTTGTAAG
SLC19A1_11	target_2638	GGGGCCGTTGAGGAGGTGCA
SLC19A1_12	target_943	CTGAGCGCAGAGCTCCCCCT
SLC19A2_1	target_2961	GGTTCCCGGAGTGGAGGCGG
SLC19A2_2	target_822	CGCCAGGCCTCTGACGTCCC
SLC19A2_3	target_2814	GCCTGCTCTTCCATTGGTCG
SLC19A2_4	target_2729	CAGAGGGTGGGCCTTAGGAC
SLC19A2_5	target_755	TGTCCTCCGCGCTTGAGCCC
SLC19A2_6	target_457	TTCCCGGCGTCCGCTGTGAT
SLC19A3_1	target_1366	GGAAGGGGGCGGAGCCTGCC
SLC19A3_2	target_2213	GTGGCCCCGGGCTCCGGGCC
SLC19A3_3	target_2435	CTGGCCCAGGGCCGGTTTTC
SLC19A3_4	target_2953	AAACAGTCAACTCTGCTGAA
SLC19A3_5	target_1463	AAAATCTGGGCTTCCACACT
SLC19A3_6	target_2676	GGATGAAAGGTCTGGACGCC
SLC1A1_1	target_2924	GGAGGGAGGAGCGGCAGGCC
SLC1A1_2	target_2600	GGGGCGGGACTCAGGGTTCC
SLC1A1_3	target_1232	AGGAGCTGGGGCGGCCTCTC
SLC1A1_4	target_1895	ACGCACCCACCCTCCTTCCC
SLC1A1_5	target_580	GGCGCCTGGGCCAACCAGCG
SLC1A1_6	target_1800	GTGGGACGCCCGGGGTCCCT
SLC1A2_1	target_905	GAGATGGGGGCGGGGGGCGG
SLC1A2_2	target_1265	CGAGAGGCTGGGGGGAGGGA
SLC1A2_3	target_1194	AGATCCTGGGCTCCTGCCAC
SLC1A2_4	target_2406	GGCAGAGGAGGGACCGCGAC
SLC1A2_5	target_1078	AAAGGAGTTGCCCGAGGCGG
SLC1A2_6	target_505	CCCAAGCCTTCCCGGACGAG
SLC1A2_7	target_1076	GCACCCCGCCCGCCGCCCCC
SLC1A2_8	target_2649	GGCGCGGAGAGTTGGCCGAG
SLC1A2_9	target_1587	TTTTTTTTTTAGGCCGAGAG
SLC1A2_10	target_2486	CTCGTGGGTGCCGGCTGAGA
SLC1A2_11	target_1700	GGGACGGTTCTCCACCCACT
SLC1A2_12	target_2074	TTAATATTAATGCAGCTCCC
SLC1A3_1	target_2932	CACCCTCGTCTTCCCTGAAA
SLC1A3_2	target_1092	AGGAAACATGCAATAATGTG
SLC1A3_3	target_1042	ACGTTTCAAAGACTTTTCTA
SLC1A3_4	target_2948	TTAATTCCCCGATTCGAAAA
SLC1A3_5	target_1777	CTCGTAACAGTTGTACAACC
SLC1A4_1	target_2669	CGGAAGAGGTTAAAATCCAG
SLC1A4_2	target_999	CTCACGCCACCACTTCCAGT
SLC1A4_3	target_2357	GTGTTTCAGCTTTGGTTACG
SLC1A4_4	target_1509	TCTCGCCAGGGCTCAGGCCT
SLC1A4_5	target_2502	GGCGGTTTGGCCATCCTGAA
SLC1A4_6	target_835	TCCTTATTGTTCACGTTCTA
SLC1A4_7	target_2294	GGCTCCCGGCGGCGGCTCCC
SLC1A4_8	target_2167	GCCCGCCGTCCCGCCCCCTG
SLC1A4_9	target_1827	GGCGCTGGCCAATCACAGCC
SLC1A4_10	target_1380	AGTGAGCGGGCTGGGGCCGC
SLC1A4_11	target_1098	GGACCAGAGGCTCCCGGCGG
SLC1A4_12	target_2506	CGGGCGGGAGGCTCCACCCG
SLC1A5_1	target_2245	GGTGTGTTGGGAGGCGGTGG
SLC1A5_2	target_2201	CCTCCTGGAGGGCCTGCCAG
SLC1A5_3	target_343	TGGCTGATGCAAGCTGTCCA
SLC1A5_4	target_375	AATATGCATCTGTGTTTACA
SLC1A5_5	target_281	TGAGAGTATGGGGGAGGATC
SLC1A5_6	target_2677	ACACTGTCACACAAGAGTAA
SLC1A5_7	target_1419	TCAGCTCCCGCTCCCCCGGG
SLC1A5_8	target_2650	GGCACTGCCCGCGGCTCCCA
SLC1A5_9	target_2882	GGACGGGGCTTTGGGGCCCC
SLC1A5_10	target_564	TAGAGGGAAGTCTCTGCTCC
SLC1A5_11	target_2085	GCGGGAGTGGTCACGTGGAC
SLC1A5_12	target_1249	CTCCTTGCTGGGGGCATTTT
SLC1A5_13	target_1122	GGGGGCGGGGCTTGAGAAGG
SLC1A5_14	target_2624	GGCGGGGCTGATACCCGAGA
SLC1A5_15	target_1689	GCTGCAGAGCGTTCGGAGAC
SLC1A5_16	target_1503	TAATACCCATCTCCAGGAGC
SLC1A5_17	target_2743	GTGGCTCTGAGCCCGTTTAG
SLC1A5_18	target_843	AAGCTGCCAGGGATAAGGGT
SLC1A6_1	target_2472	CGCCTGTAATCCCAGCACTT
SLC1A6_2	target_2240	CAGGAGAATCACTTGCGCCC
SLC1A6_3	target_2946	CTGGTGAGGGCCAGGACAGA
SLC1A6_4	target_2945	CCGGCGTGGGCAGATGGCGA
SLC1A6_5	target_2986	GGACTCTCAGAAGGCGGGGG
SLC1A6_6	target_1446	AGGGTAATGAGCGCTTCCTG
SLC1A6_7	target_2830	GGAGCCTGGGCTGGGCGCGG
SLC1A6_8	target_1751	TGGGGGTGGGCGGGGGTGAG
SLC1A6_9	target_2381	GCGGGGGCTGGATGCCGGAG
SLC1A6_10	target_1999	GGGCACCGAGCGGCCGGGGG
SLC1A6_11	target_2189	GAGGCGCGGCTCCGAGCAGG
SLC1A6_12	target_876	AGGCGGAGGGCATCGCGGAG
SLC1A7_1	target_1660	TTCTTTCTGGAAGGAAGCAG
SLC1A7_2	target_1368	GAACAAGAGGAACATTTGCT
SLC1A7_3	target_1844	CCAGCTGCATCATTAGGAGC
SLC1A7_4	target_1333	AAGAGGAACGCTTGGCTTTG
SLC1A7_5	target_346	GTGGTCTGCTCTAATTTCCC
SLC1A7_6	target_2200	CAGTTGAGTGGACCAGGTAC
SLC20A1_1	target_2794	CCCTCCCTGCGGCCTCGCCC
SLC20A1_2	target_2622	CTGGGCACGCCGGGCCGAGG
SLC20A1_3	target_854	CCACGCCCCCAGCGGGGAGC
SLC20A1_4	target_1198	CTGTCCCGCCCCACGTGGAC
SLC20A1_5	target_2680	GCGCCACCGTCGGGCTCACC
SLC20A1_6	target_1269	CCAGACGGTGCCGAGACTCC
SLC20A2_1	target_1585	CGCGCGCCCGGCCCCGACTC
SLC20A2_2	target_1915	CGCTGGCCGCGTGCCGCCTC
SLC20A2_3	target_2228	CGCTCCGGGGCTCTTTACCC
SLC20A2_4	target_2139	GACGAAGGCAGAGGGCGTCC
SLC20A2_5	target_2146	CCTGCCGGCCGGTCGGTTTC
SLC20A2_6	target_1231	ACCTGGCTCCTCGTTTCATC
SLC20A2_7	target_2028	ACAAGCAAAAGCAAAGCAAA
SLC20A2_8	target_2952	CTTTTATTTCAGGATTCTGG
SLC20A2_9	target_817	ATTCAAATCAGACCAAACTT
SLC20A2_10	target_2984	AGAAACTGGGGTGGCGGCGG
SLC20A2_11	target_2483	CAGGCCTTCACCCAACATCC
SLC20A2_12	target_2960	ATCCCAACAACCCTGCTGGG
SLC20A2_13	target_1230	CTTGGTATTCTGAAGCCAAA
SLC20A2_14	target_1893	GCACTAAAGCTCCATTTTAC
SLC20A2_15	target_540	GAAAGCAATTCACAGGTGCT
SLC22A1_1	target_1330	CCTGCCCTCTTCTTGCTCTG
SLC22A1_2	target_1336	AGGAAAAGGAAGAATGCACG
SLC22A1_3	target_300	GACCCCACTGACTCGCTCCC
SLC22A1_4	target_2345	GCTGAACTTCAATTCTCTTC
SLC22A1_5	target_2305	CTGTCCAAGTGTGAAACATC
SLC22A1_6	target_1216	AATCTTTTACCCTATGGTGC
SLC22A10_1	target_1493	GGAGAGAGTAAACCTTTAAA
SLC22A10_2	target_2177	GTGACTCATGAAATTTACAT
SLC22A10_3	target_981	CACTTGAGGACAAACATATT
SLC22A11_1	target_1923	CAGGGAGTGGCTGAGGCCTC
SLC22A11_2	target_882	GATTTAAGAATGAGATCAGC
SLC22A11_3	target_928	GTTAAAGTTTAATCTCAGCG
SLC22A11_4	target_2602	AGGAAGGCAGTTCATGTCTC
SLC22A11_5	target_2983	GGGCTGTTGCCTCACTGAGT
SLC22A11_6	target_2071	GATGTTACTGAATTACAGTT
SLC22A12_1	target_955	GAGAGGCCATAGCTGAGGTG
SLC22A12_2	target_1743	AGGGGACAGAGATCTCAGGG
SLC22A12_3	target_2162	TCCACCGAGGACTCAGGACA
SLC22A12_4	target_1423	GTGGGGTGTCTGTTGATGCT
SLC22A12_5	target_988	CATTGGGCACACCGAACCTG
SLC22A12_6	target_1259	GGTAACAGCAAAGCGGGCAC
SLC22A13_1	target_637	CATCCTCAGCAAACTAACAC
SLC22A13_2	target_2448	CAGGTGGAGCAGGGCAAGGC
SLC22A13_3	target_519	GCTCTGGGAACTTGCTCCTC
SLC22A13_4	target_1900	TCAGCCCCCTAGGTGTGACT
SLC22A13_5	target_2749	TGATGAAAAAATAGTCCACA
SLC22A14_1	target_803	CCCCCCTGGCCCAACCATCC
SLC22A14_2	target_2382	CTGTGCTTCTGTTGTCATGA
SLC22A14_3	target_2916	CTCAATTACACTAAAACTCC
SLC22A14_4	target_2550	TTAACTAAGAAAGCAAGGGA
SLC22A14_5	target_1833	ACTACTGAGAACGTCAAGGT
SLC22A15_1	target_2820	GGGCCGGGGCGGGCCGGGCC
SLC22A15_2	target_750	GGGCGGGGCGCCTGCGCGGG
SLC22A15_3	target_2432	GGTGGACGCCGGGCGGGGAG
SLC22A15_4	target_2863	GCGGGGCTGTCAGGCTCGAG
SLC22A15_5	target_2869	GGGGCTGGATGCCCTGGACC
SLC22A15_6	target_2130	AACAGGAAGTCCAGAGGCCC
SLC22A16_1	target_2466	GAGCAGGAGGCCGGGCGGGG
SLC22A16_2	target_2689	TGCCGCCTCGGCCTCCTTCC
SLC22A16_3	target_929	CGCCGGGACCACAGCGCGCC
SLC22A16_4	target_697	CCCCGCGCGTCCCAGTGCTC
SLC22A16_5	target_1676	AGGGGCCAAGCGACGGAGGG
SLC22A16_6	target_204	AACAGAATACAGCCTCGCGC
SLC22A17_1	target_243	GGGGGCGGGGGTGCTGGGAG
SLC22A17_2	target_321	GCAGGGGGCAGGTGGGAGGG
SLC22A17_3	target_1760	GTTGGGGGGCAGGGGGTGGC
SLC22A17_4	target_1807	TGGCGTCGCCACCTGGGGCT
SLC22A17_5	target_2027	GCGGAGGAAACCGCAGAGCA
SLC22A17_6	target_467	TAGGAAGGCAGTCAGGGGCG
SLC22A17_7	target_2899	GGGGGGCCAGGGCCCAGGGG
SLC22A17_8	target_871	GGAAGGGGAGGAGAGTCTAG
SLC22A17_9	target_1631	CCTCTCTCTGACGAAGAGTC
SLC22A17_10	target_2211	CCGCAATGGCCCGCAGACCC
SLC22A17_11	target_1035	GGGCTCTGTCGTCTCTTTCC
SLC22A17_12	target_2154	TGAAGGATAGTAGCTAGTCC
SLC22A18_1	target_1036	TGGGTGAAGAAGAAAGCAAG
SLC22A18_2	target_630	ACCAAAGCCGCTTCCTCTGG
SLC22A18_3	target_2640	ATGTGGGAAAATTGCCCTTT
SLC22A18_4	target_2195	GGGGAACTTCCTGGTTCTGA
SLC22A18_5	target_2421	GAGGAAGTCCAGGGGTGCCA
SLC22A18_6	target_967	CTGGGGACGCACAGGCTCGC
SLC22A18_7	target_1779	AGCCCCGGCCCCGCCCTTTC
SLC22A18_8	target_1963	GCCCCTGCCCCGCCCACCAG
SLC22A18_9	target_1389	GAGCCCGCCCCTCCCCTCGA
SLC22A18_10	target_2987	GGCACGGGCGCTCCCGGAAC
SLC22A18_11	target_1949	TGCAACAGGGACCGCCCCTC
SLC22A18_12	target_2884	CGATTGCAAAGCGCGAGGGC
SLC22A2_1	target_1891	GGGCATTTGGGAAGTGCAGA
SLC22A2_2	target_1270	AGATTACTGGGCTGTGATAT
SLC22A2_3	target_2906	TTCCCTGCGGTGGGACACAG
SLC22A2_4	target_2008	GACATGCACCCCCGCTGGAG
SLC22A2_5	target_2024	GGGCGGGTTGTTTGTGCTGC
SLC22A2_6	target_573	CCAGTTATAATAAACACGAC
SLC22A20_1	target_397	GGGAGGGGGAGGAACAGGCC
SLC22A20_2	target_2366	AGAGAGGCCGGGAGGGGCCC
SLC22A20_3	target_426	AGAGAAAGGGCATGGGGGAG
SLC22A20_4	target_1226	TCTCTCCATCTCTCACCCCG
SLC22A20_5	target_1608	TCAGGTGTCCCCACATCTGC
SLC22A20_6	target_2795	ATGTCTGCAGTCCTCACCCC
SLC22A23_1	target_117	CGGGCCCGCGGCTCCCGCAG
SLC22A23_2	target_83	GAGCCGCGGGCCCTCCTCGG
SLC22A23_3	target_142	ACCCGCCGGACCCCGCGCCC
SLC22A23_4	target_131	GCGCCCCGGGCACAGCGCGC
SLC22A23_5	target_42	GCGGCTGCAGGCGCCTGGCC
SLC22A23_6	target_143	AGAGCGCGGCGGAGGCTCCG
SLC22A23_7	target_1778	GGGGGCAAGAGTGGCAGGCC
SLC22A23_8	target_2140	GTGCCCCACCCCCACGTACC
SLC22A23_9	target_942	GTTTCCTCAATGGTAGAATG
SLC22A23_10	target_2484	CAGAGTTGGGGCTGCAAGCC
SLC22A23_11	target_2066	TCAGTGCTGCCTGACCTTGA
SLC22A23_12	target_1114	GAGGACAGACGCAGAACACT
SLC22A24_1	target_721	TTGTACAAAGATCAGAGAGC
SLC22A24_2	target_191	AGCAGGGCTTTTTTTGGACT
SLC22A24_3	target_1370	GTTCAAGTCATACCAATGAC
SLC22A25_1	target_418	GCAATTTCCTCAAGTAGTTT
SLC22A25_2	target_2179	TGACCCCACTCTCTTCTTAA
SLC22A25_3	target_314	CCCTCTCTCCCATCTGCAGC
SLC22A25_4	target_1199	CTGGACAAGTGATCCCCAAG
SLC22A25_5	target_2516	ACTTAGTGTGATTTAAGGAA
SLC22A3_1	target_317	GGGTGGCGCGGGGGAGGCGG
SLC22A3_2	target_2284	AGAGAGGCGGGGGCCGCGGG
SLC22A3_3	target_727	GCAGGAGGAGCGGCTGCGGC
SLC22A3_4	target_819	CCGGGCGCCCGCAGCAGCCC
SLC22A3_5	target_652	CAGCGCCAGGGCGAGTGAGG
SLC22A3_6	target_1522	CCTCCCGCGACCTGTGGCCC
SLC22A31_1	target_2717	TGGGCAGGGCAGGGAGGGCG
SLC22A31_2	target_563	GCCCCCACCCCAGCCGGCCA
SLC22A31_3	target_1440	GAGGGACCCCGGGGACACCC
SLC22A31_4	target_2537	GGGTACCAGCGCAGGTGCTG
SLC22A31_5	target_2258	CTATGACGCCACCAAGGCCC
SLC22A31_6	target_796	AATAGGAGGTGGAAACGGGT
SLC22A4_1	target_2520	CCCATCCCCGGCCGGGCGCG
SLC22A4_2	target_728	AAGGGGAGGGCGGCCCAGCC
SLC22A4_3	target_1329	AGCCGGGAGCCCAGCCTCCC
SLC22A4_4	target_958	CGGGCGCGCGAAGCACAGGG
SLC22A4_5	target_1316	CAAGCTCAGCGCGAGCTCCC
SLC22A4_6	target_865	CCGCCCCCAAGGACCTGACG
SLC22A5_1	target_2337	TGGGGCGGGACGCGAGGGCG
SLC22A5_2	target_389	GGCCCGGGCGGGGCCTGTCC
SLC22A5_3	target_996	CTCTGCCAGCCAAGCCTGCT
SLC22A5_4	target_2904	CCGGGCCTCGCCAGGTCCCC
SLC22A5_5	target_2124	GCGGGCCGGGAGTGCACCTG
SLC22A5_6	target_1679	TAGGAAGGCAGCGGGACTCG
SLC22A6_1	target_200	CAGGAGAGGGTGGACTGAAT
SLC22A6_2	target_2672	GGGGGGCATCTGGGGGCAGG
SLC22A6_3	target_1673	AGCAGGGAGAGGGGTGTATT
SLC22A6_4	target_1541	GGGGCCAGAGTGGGATCTAT
SLC22A6_5	target_2862	GACCTATTTGTCTTCCTTTT
SLC22A6_6	target_2349	AAGTGTGACTTGGTATCAGA
SLC22A7_1	target_2563	CCTGTCTTGCCTGGTGCCTG
SLC22A7_2	target_1287	AGAGGTCCCTGGAGACCTGA
SLC22A7_3	target_2539	GCTGGGGAGGGCCCAGTCCT
SLC22A7_4	target_1236	GCAGCCAGAATCCAGCCCTC
SLC22A7_5	target_1039	AGGGGAAGCCATCCATTCAG
SLC22A7_6	target_2514	GGTCACTGGCTCGTGGCTCT
SLC22A8_1	target_1499	GCTGCCTCAGCGAGGGCCGC
SLC22A8_2	target_2444	TGAGGAGAGCTGGGCTTGGT
SLC22A8_3	target_1813	GCAGCGTGGCTGAGCCTAGC
SLC22A8_4	target_2806	AGAAAGTCAAACATTAGCCC
SLC22A8_5	target_666	TATATAAGCCCCCCTGGGGG
SLC22A8_6	target_1913	TGCGGATTAACGTCACTGGC
SLC22A9_1	target_1918	CATTCCAGGAAGCATAATTT
SLC22A9_2	target_1347	ACTAAAATAAACCTGCTACA
SLC22A9_3	target_1565	GTAGCTCCCAAAGTCAGCAC
SLC22A9_4	target_1379	ACTTCTCTGAAAACAACAGA
SLC23A1_1	target_1263	TGTAACCAGATGCCCAGCTC
SLC23A1_2	target_490	GCGCAGATGTGGGCAGGGAA
SLC23A1_3	target_1031	ACATGTGGCAGAGGCTTGGG
SLC23A1_4	target_1716	GGATTGCGAAAGGGGGGCCC
SLC23A1_5	target_2412	CCAAGAGAGGGCCAGAGTCG
SLC23A1_6	target_2103	GTTAATACATTACCTCTGCC
SLC23A2_1	target_1394	CCGCCCCCGACCCCTGCCCT
SLC23A2_2	target_2627	GGGCCGGGGGCGGGGTGCAG
SLC23A2_3	target_2951	GGAGCCGCCCGCCCCCGCGC
SLC23A2_4	target_931	AGCAGCCCCTCCCCGGGGGG
SLC23A2_5	target_2513	GAGGGAGGTGGGCCCCAGAC
SLC23A2_6	target_2629	GGGAGCGCTGCCGGGTGCCA
SLC23A2_1	target_991	AGAACAAAAAGGCAGGGCGA
SLC23A2_2	target_266	ATTTCTGGGTCTGACTGGGA
SLC23A2_3	target_429	GGCATCATCCAATCCACTGT
SLC23A2_4	target_2943	TTGCACCCTCTTCTGGAGCA
SLC23A2_5	target_547	CCACTTTCACCCACGTGAGC
SLC23A3_1	target_2913	GGTATAAGGAATTTGGGGCA
SLC23A3_2	target_2226	GCTGGGCAAAGGTGAAAGGG
SLC23A3_3	target_369	TGGTCTAGGGGCAGGAAATC
SLC23A3_4	target_1064	GCTGTAGAAAGTAGGATAGG
SLC23A3_5	target_1157	AAATTCCATCAGCCATTAAC
SLC23A3_6	target_1969	GGAAGAAGATTCTCGGGGGA
SLC24A1_1	target_669	GCCTTCCACCAGGGACACAG
SLC24A1_2	target_407	ATAAGCTTCTTAGAGGAGGT
SLC24A1_3	target_684	CTGTGGGCCCACAAAGTCAA
SLC24A1_4	target_909	CAGGCTTGGTCAGGTGTACC
SLC24A1_5	target_833	ATTGTACAAGTTCTGGGTCC
SLC24A1_6	target_2668	AGGGGAAGAATATCCGATCG
SLC24A1_7	target_765	TTCCTGCTTGTCCTGGAGCC
SLC24A1_8	target_642	TTAGGAGACAGGTAGAGAGG
SLC24A1_9	target_326	TCAGTTAGTTCAGCTGCAGC
SLC24A1_10	target_2807	GGTGGATCAAAGGCTCTGCC
SLC24A1_11	target_2530	GGCTCTGGCAATAAGCTCCA
SLC24A1_12	target_238	AGAAGCTGGAAAGTGCAATC
SLC24A2_1	target_911	CTCAGTTTCCTCATTTAAAA
SLC24A2_2	target_2801	AGATCGCACAGCTGCAGGAC
SLC24A2_3	target_2524	ACTCATCTTGAAAACAATCC
SLC24A2_4	target_2463	AATTACGGTACCTACCACCC
SLC24A3_1	target_873	GGGCGGCGGGGGCGGCCGGG
SLC24A3_2	target_2958	GCGCCGGGAGGCGGCGGCGC
SLC24A3_3	target_1724	GGCGGGGGCGGAGGGGGCAG
SLC24A3_4	target_756	GGCCTGGGGCGGCGGCGCGG
SLC24A3_5	target_1017	GGCGAGCGGCGAGGAGGAGG
SLC24A3_6	target_899	GAGGGAGGGGAGGAGGGACT
SLC24A4_1	target_1211	GGTGGAGGGGACCCCAGCCC
SLC24A4_2	target_2017	AAATTTCAGAACAGCAGCTG
SLC24A4_3	target_2266	GGTTTTGTATCTCTCCTTTC
SLC24A4_4	target_856	GGGGTGATACAGGTGCAGGC
SLC24A4_5	target_1940	GGTGTAAACCGCTTTAAAAA
SLC24A4_6	target_1681	AACATGGAAAGCTCAACCGT
SLC24A4_7	target_450	GCAGCGGGCGGGAGGCGCCA
SLC24A4_8	target_331	GCAGGAGGGGAGGAGTAGGG
SLC24A4_9	target_392	AAGGGCGGGGGGTGAGAGGC
SLC24A4_10	target_554	TGCGGGCGCCAGCGTCTGAG
SLC24A4_11	target_2331	CTGAAGAGAAGAGTGCACGG
SLC24A4_12	target_2090	GGGATTATATTGGTCAGTAG
SLC24A4_13	target_1650	GGCGCTGGGGCTGGAGCAGG
SLC24A4_14	target_227	AGGTCGGCGGGGGAGCCCCT
SLC24A4_15	target_576	GAGAGGATGGGGAGCTTCAG
SLC24A4_16	target_1596	GCGCGCGGGACTCTGAGCTC
SLC24A4_17	target_1993	GAAGGTGGGGACGCGCGACG
SLC24A4_18	target_638	GGCCAAAGCCTCATGGCCCG
SLC24A5_1	target_779	CAGCTCTCCTCCGTCTCCTC
SLC24A5_2	target_1533	TCCTGCCCAATACCCTGCCC
SLC24A5_3	target_1555	GACCCAATCTCCAGGGAGGC
SLC24A5_4	target_1583	ACTCGCCCTTTCTCCTGTGC
SLC24A5_5	target_475	GGCCTTGCTGAGATGTGCCC
SLC24A5_6	target_506	AATCTGCCCTTAGAGACTGT
SLC25A1_1	target_178	GCCCCGCGCCCCGCGCGCTC
SLC25A1_2	target_155	CGGCCGCCGCGCCCGCGTCC
SLC25A1_3	target_86	CGGGCATGGCGGGCGGGAGG
SLC25A1_4	target_91	GGGGCGGGGCCTCAGCGTCC
SLC25A1_5	target_151	GAGAGGGGTCCGCGTCCCGG
SLC25A1_6	target_112	GGAAGGCGATCCTGGCAGGT
SLC25A1_7	target_2391	GGCCTGGGCGGGGCGCGCCG
SLC25A1_8	target_2238	GGCTGCGGGAGGCGGAGCCG
SLC25A1_9	target_1120	GCGAGCGGCGGGACGGGGGC
SLC25A1_10	target_2659	CGGGGCCAAAGCGCAGCCAA
SLC25A1_11	target_572	GTCGCCCAGGGACTCGGCCT
SLC25A1_12	target_676	CAGCTCCGAGCAGTGGGTCA
SLC25A11_1	target_2989	GAGCGGCGGAGGCCAGAGGG
SLC25A11_2	target_658	ATCGCGAGAGCGCTCCAACT
SLC25A11_3	target_2032	ACAGCAACTATTCAGCTGCG
SLC25A11_4	target_2420	TTTCACCGAATTAGAATCGC
SLC25A11_5	target_1087	ATAGAGAAGAGTTTGTTTGA
SLC25A11_6	target_653	AGCACTCTCGCGAGATTTGA
SLC25A12_1	target_2634	GCGCGTCCCCCTCCTCCGCC
SLC25A12_2	target_1197	CTGGTCCAGGGCCGGCCGGC
SLC25A12_3	target_759	GCCGCGTGCGGAAAGGGGCC
SLC25A12_4	target_706	GCCTTTCTGGCCGGGACGCC
SLC25A12_5	target_323	GCGCTTGTTTTCCCCGTGGG
SLC25A12_6	target_2250	GCGGCGCGTCGGGATCCCAT
SLC25A13_1	target_2633	TCAGATCCTGGGGCAGTGGC
SLC25A13_2	target_2710	CTGGGCCCAGCCTTGGCCGC
SLC25A13_3	target_2385	CTCTGCCCTGCAGCCGGGGA
SLC25A13_4	target_2438	CCGCTGGATCACGCGCACCC
SLC25A13_5	target_2996	GGCCTCTGCGGCGTGGGCAG
SLC25A13_6	target_1124	CCCGCTGCGCTGTCCAGCAG
SLC25A14_1	target_1040	CTGCAGGCGCAGAAGCCTAG
SLC25A14_2	target_230	AGAGTTCTAAAGGCGAGGGT
SLC25A14_3	target_1757	GTTTTTAGTTTTGGAAGGGG
SLC25A14_4	target_1140	GGGGCAACCGGACTTGCGGG
SLC25A14_5	target_2133	AAGTAACCAAAGCGTTGCTT
SLC25A14_6	target_823	GAGTTGAAATGGCTGCGCCG
SLC25A15_1	target_1139	CGGGCTGGCTGTGCGCGCCG
SLC25A15_2	target_424	ACGGGAAGCGGAAGTGGGCG
SLC25A15_3	target_1972	GTCGGCGGCAGCACCACGCC
SLC25A15_4	target_1966	GGTCTCGGGGATCCCAGAGG
SLC25A15_5	target_665	TAGCCCGCTGGGCTGGGACT
SLC25A15_6	target_1936	CCCGCTCTCCACCTTCACCA
SLC25A16_1	target_837	GGGGCTCTGCCGGGAGGGGC
SLC25A16_2	target_2579	GTGGCAACGCCGGGTGAGGC
SLC25A16_3	target_1992	CTGCTCAGGCCCCTTCTGTT
SLC25A16_4	target_2107	GGGGCCTGTGTCACGCGCCA
SLC25A16_5	target_2270	TGACGCCCTGTTCCGCGTCC
SLC25A16_6	target_2293	GGACGGAAAAAGGAAACGGT
SLC25A17_1	target_1307	GGCCCCTGTGGGCGCGGGGC
SLC25A17_2	target_1729	GGGGCGGGAAAGCGGGGGGG
SLC25A17_3	target_1457	GGAACCGGGAGCCGGGTACC
SLC25A17_4	target_2723	CAGCGAGGTGTTCGCGGGGC
SLC25A17_5	target_1254	GGAGGAACTGGTCAGGGCCC
SLC25A17_6	target_1431	GGAACGCCAGAGAACGTCGG
SLC25A18_1	target_1709	TCATGCTTTCTCGAACCTGC
SLC25A18_2	target_2526	TAAAACTGCTTAAGGAAACT
SLC25A18_3	target_1519	CAGCACACAATAGCCAAATC
SLC25A18_4	target_1867	TCCAGATGCCTTCGCCTTCT
SLC25A18_5	target_1233	CTGCATTGATATGCATGTCA
SLC25A19_1	target_1973	GCTTCCTGGGAGATGTAGTC
SLC25A19_2	target_605	AGCTGCACGGTGATTGGCCC
SLC25A19_3	target_1785	CTCGCGCGCCCGCGAGCAGC
SLC25A19_4	target_268	CCGTCCAGCTGTCCTGCCCT
SLC25A19_5	target_600	CCCGCCAGACGCTGGACCAA
SLC25A19_6	target_345	CGCCTCCCGCAAGATATCAC
SLC25A2_1	target_1788	GCTGGAGGCGGCTGGGGGCC
SLC25A2_2	target_2569	GGTCCGCGTCCCCCGCCTGC
SLC25A2_3	target_382	TCCTGCGGCTCCTGGCGCAC
SLC25A2_4	target_488	TAGTGAGCCGCGCGCTGGGC
SLC25A2_5	target_1501	GGTGCAGGGATGGCGGCTCC
SLC25A2_6	target_618	CTAAAATAACCCCCTGCTGC
SLC25A20_1	target_2136	GGAAGGCTTCCTGGAGGAAT
SLC25A20_2	target_2076	GGTTTGGGAGTGTGGGCCAG
SLC25A20_3	target_923	TCTGGAGTGAGTGGATGAAT
SLC25A20_4	target_578	CAGAGGAAACATGGAAGTCT
SLC25A20_5	target_1315	TGGCAGAGCGCAAAGCCGCA
SLC25A20_6	target_2994	CCAGCACCTAGAAGGACGCC
SLC25A21_1	target_2739	CGCCCACGCCCTTCTCTATC
SLC25A21_2	target_1825	GTACTTGGCGCTCCAGGCCT
SLC25A21_3	target_640	TCACTGTGCTCTGGCTTGCC
SLC25A21_4	target_2188	GGGACGACACTTGCACCTCC
SLC25A21_5	target_831	CACTTCACTTGAGTTATCAG
SLC25A21_6	target_881	CTAGTTTGACAAACTACCGG
SLC25A22_1	target_659	CGCCGCGCGCGCTCCGCCCT
SLC25A22_2	target_362	GGCCGGGCCGCGCGTCCCCA
SLC25A22_3	target_2389	GGGGAGCCGAAGCCCGGAGG
SLC25A22_4	target_860	GGCGGGGAGGCGCGTCCGCT
SLC25A22_5	target_2174	CCCACGGCCAGGGGGCGGGT
SLC25A22_6	target_677	CGCGTGGCTGTGGCCTGGCT
SLC25A22_7	target_419	GGCCGGGCTGCGGGGGCGAG
SLC25A22_8	target_1817	GCGGGCGGGAGGGGGGGTCC
SLC25A22_9	target_2237	GGTGCTGCGGCGGCCGAGGG
SLC25A22_10	target_2759	CTGGCGTGAGACGCCGTGCT
SLC25A22_11	target_2777	GGGAGCGCGCCCGGAACCGT
SLC25A22_12	target_707	GCTGCCCGAACAACGTGGCC
SLC25A22_13	target_1328	GGCCGTGGGGCGGGGTGGGG
SLC25A22_14	target_1707	AGCAGGGGTGGGTCTGACTC
SLC25A22_15	target_240	GTGGGTGGCCTCGCTGTGCC
SLC25A22_16	target_1883	GGGCACTTTCTCTTTCACTT
SLC25A22_17	target_454	AGGCGAGGGGCCGCAGGGAT
SLC25A22_18	target_2063	AGGCTTCCGGCAGCCTTGAG
SLC25A23_1	target_403	GAGGGGACCGAGGGCGGAGC
SLC25A23_2	target_1376	GGGCGTGGGGAGGGAATGTC
SLC25A23_3	target_1794	TCTCCTCCCCCGACCTGCAT
SLC25A23_4	target_2954	GCACTTGCGGGAGGTGGTGA
SLC25A23_5	target_1160	AGTTCTGGCGCGGGCGGCGA
SLC25A23_6	target_215	AGACGGGCTAGGGAGCTCAG
SLC25A24_1	target_1006	TGGGCTGCGCTGGGAGACCG
SLC25A24_2	target_2950	GCGCAAAGGCGCGAGCGCGC
SLC25A24_3	target_972	CCCTGGAAGTTTCTGGGGAA
SLC25A24_4	target_2002	TCTTCCTGGAGTGGGAGCCG
SLC25A24_5	target_2149	TGCGGTCCCACGCAGGTCCC
SLC25A24_6	target_1349	TGATCAGACGTGAGTGAGGC
SLC25A24_7	target_2464	GGGAGCTGGGAGCTGGGTCT
SLC25A24_8	target_199	GGGCCCGGCCAGTGCCGCCG
SLC25A24_9	target_368	TGGGGAGGAGCTCGCCGCGC
SLC25A24_10	target_1722	CCGAGGAAGAGGCCCCCAGC
SLC25A24_11	target_2075	GGGAGGTGCTGTGCGGACCC
SLC25A24_12	target_2038	CACTTCCGGCTCTCTGGAGG
SLC25A25_1	target_2688	GCGCGGAGGGGCGGGGCTCC
SLC25A25_2	target_1739	CCGCTTCGCCGGCCACGCCC
SLC25A25_3	target_2709	GGCTCGGATGGGGAGGAGGG
SLC25A25_4	target_1391	CGGGGTCACCCGGCTCCGCC
SLC25A25_5	target_2803	TGACTGGCCTTCGGTGCGCC
SLC25A25_6	target_1046	CTGGCGGAAGGGGCGGCTTC
SLC25A25_7	target_827	GCTGCCTGTGATTGGAGGGC
SLC25A25_8	target_1793	GATGCTCGGGTCCTCGGCTT
SLC25A25_9	target_2665	GTCGGCAGAGGTGATTGGCC
SLC25A25_10	target_574	GCTGCAGTGAGAATGCAGAC
SLC25A25_11	target_2909	GCGGACTCAAGCTCCAGATG
SLC25A25_12	target_1429	GCTGGTAGGGATAATGAACT
SLC25A25_13	target_524	CTGATGCCACCTTCTCCCCC
SLC25A25_14	target_2529	CAGCCAATGAACACAGAGCC
SLC25A25_15	target_2302	AGCCTGGCCTCAGCTGTCAT
SLC25A25_16	target_2244	TGGCAGGACTTGCCGTGGGA
SLC25A25_17	target_2919	AAGTGAGAGGCACAAAGATC
SLC25A25_18	target_2427	AGTTAACTGCAGGGAGGGAG
SLC25A26_1	target_1469	TAGGCTACACCATATAGCTT
SLC25A26_2	target_2089	TGTAGTTGGCTATACTAGCT
SLC25A26_3	target_884	GCTGTACAGGTTTGGTAGCT
SLC25A26_4	target_1134	CGTTTCTCAGAAGAGTATCC
SLC25A26_5	target_2015	TCATGTGTTGCTTAACCACC
SLC25A26_6	target_1065	TCATCCTTGTGCAAGCAACA
SLC25A26_7	target_201	TAACCTCGGGAGGCGCGATT
SLC25A26_8	target_1748	GGCGGAGGGAGGAGTCGTGA
SLC25A26_9	target_1399	ACCCAGAAGAGGCGTGGCTG
SLC25A26_10	target_2307	CCTAATCGGATATTTCATTT
SLC25A27_1	target_1373	GGCTCCGCCCCCGGCCTCCA
SLC25A27_2	target_582	GCCGGCCGCGGGTCCCTCTG
SLC25A27_3	target_1811	ATGCAAGGAGGGGCAGGGCC
SLC25A27_4	target_830	GAGGTGGGAGGGAGCGACAA
SLC25A27_5	target_2701	GGAAAAATCACCTGAAAACT
SLC25A27_6	target_1804	CTCGCCCGTCAGTCCTAGCC
SLC25A28_1	target_2271	AAGGGGAAAAGGTGGGATGT
SLC25A28_2	target_2783	CCTGTCATTCCTCCGCCCTG
SLC25A28_3	target_698	GGAAAGGGGTGGGTCTAACT
SLC25A28_4	target_2306	CACGCCCCCCAAGCAACCAT
SLC25A28_5	target_2335	CTTAGAAGCTTCTTGTTTAT
SLC25A28_6	target_2194	CGGCTGATTTTTCGTACGTA
SLC25A29_1	target_430	GTGGGCGCGCGGGCGGGGCG
SLC25A29_2	target_603	GAGGCGGGGCGCGGGGGACG
SLC25A29_3	target_360	GGGTGCGCAGGTCCGGCGGG
SLC25A29_4	target_2212	GGCGGCGAAGCGCAGTGCCC
SLC25A29_5	target_1911	CACGCCCGGCCAATGAGGCG
SLC25A29_6	target_548	CGCCGAGTGAGGCCAATGGG
SLC25A3_1	target_2754	GCGGAAGAGCTGGGGCGGGC
SLC25A3_2	target_1095	TTCTGCGCAGGCGCGCGTTC
SLC25A3_3	target_1951	GGGTCTATATTTTTTGAGAG
SLC25A3_4	target_2572	AATCCTCCCGCGCACAAGCC
SLC25A3_5	target_2796	GGGGCGGGAATAAGGTTGCT
SLC25A3_6	target_1766	ACGCGATGACGCTACGGGCT
SLC25A30_1	target_2059	TCTTCCCCTGCCGCTGCCTG
SLC25A30_2	target_596	GCCCGTCCCAAGTGCCCCTC
SLC25A30_3	target_2643	GCCCCAGATGGGGACACGGA
SLC25A30_4	target_1755	GTCAGGGGTGTGGCTAGTGC
SLC25A30_5	target_1508	GAAACCAATGGGAGCTGAGG
SLC25A30_6	target_1479	GGCCTCCGATATCGACTGGG
SLC25A31_1	target_2528	CGTGTCAGGTGTCACGTGTC
SLC25A31_2	target_1091	GCAGGCGTCACCGCGCATCC
SLC25A31_3	target_1268	GGAGGCGGTGAGCATTGAGC
SLC25A31_4	target_1574	CGCGTGCGGAAAAGCTGCGC
SLC25A31_5	target_364	CACTTCTACGAGCGGAGCCT
SLC25A31_6	target_1213	GACTCCTGACACGTGGCTCC
SLC25A32_1	target_1073	CACGTGACTGGAAGTAGTCT
SLC25A32_2	target_1632	GACACCTCGTGGAGTCCGGC
SLC25A32_3	target_2554	GCGGTGGGCGGAACTCCTAG
SLC25A32_4	target_1113	ACCTCTCTGTAAGTCCAACT
SLC25A32_5	target_2928	GGAAAAGCGGAAGTCGCCTG
SLC25A32_6	target_365	GAAGATGCTGAGCCGGAATC
SLC25A33_1	target_764	GGGCGCGCGAGTCTGGGGCG
SLC25A33_2	target_825	CCCGGCGCGCGGCCGTCACG
SLC25A33_3	target_724	GGGGCCGGACCGTGACGTCA
SLC25A33_4	target_2873	GGTTAGGACGCGGATGTGGG
SLC25A33_5	target_2845	GGGGAGGTTGCGCAGTTCTG
SLC25A33_6	target_1229	GCCAGCCCCGAGCGAATGAC
SLC25A34_1	target_2620	CCAGGGTCCAGGCCCGCCCT
SLC25A34_2	target_1928	CGGAGGCGCGTCCCAGGCTC
SLC25A34_3	target_2316	GCTCTGCTCAGCTGTTCCAG
SLC25A34_4	target_775	GCTGGCAGGTGTGGGCACAG
SLC25A34_5	target_650	TGGACTGCTGAGATAGACCA
SLC25A34_6	target_180	ATCTGGGGGAAAGGTCACTT
SLC25A35_1	target_1480	TGGGTGTCAGAAAGCGGGGT
SLC25A35_2	target_1558	GGAGTCAAGAGCTGGCAAGC
SLC25A35_3	target_2039	GATAGAAATCTAGGAGATTC
SLC25A35_4	target_2091	AGAATTTAGATTTGCAGTCA
SLC25A35_5	target_744	TGTCAGGGTCAAATGTCAAG
SLC25A35_6	target_585	GTCAAACGTCAGCTGGAATT
SLC25A36_1	target_1412	GCGCGACGGAGAGTGGGCGG
SLC25A36_2	target_847	GGGGGAAGATGACTATTTGA
SLC25A36_3	target_1343	TGGGAGCCTCTGTTTATGTC
SLC25A36_4	target_226	GCGTGGCCAGAACGCGTGCC
SLC25A36_5	target_1640	TTTCAATGAAAGGGGCCGCG
SLC25A36_6	target_1101	GTTCTTTCACGTGATCCCTA
SLC25A37_1	target_998	ACCAATGGCGCGGCGGCCGC
SLC25A37_2	target_1144	GACGGGGGCGAGAGGAGACG
SLC25A37_3	target_670	TGGGCTGGTCCGCGAGGGGC
SLC25A37_4	target_1245	GTGACGTCACACAGGGAGGC
SLC25A37_5	target_2329	GCTTGGAAATGTGCACGGGA
SLC25A37_6	target_351	ATCGCCGGGAACCAAGAGGC
SLC25A38_1	target_619	TTCTGGGCGTTTTCACCAGG
SLC25A38_2	target_1267	GTTCTGGGTGCAAGGAAGCG
SLC25A38_3	target_1870	CAGGGAACTTTGCTTTTGCG
SLC25A38_4	target_975	GCTGCCTTACTGGGCAGACC
SLC25A38_5	target_2375	ACGTATTTACAATCCAGACC
SLC25A38_6	target_2503	CAATAGCCCACGTTGGCTAG
SLC25A39_1	target_1526	GCGGGCGGGGCCTCGTGGCG
SLC25A39_2	target_539	CAAGGGGGCGGGACCGTCGC
SLC25A39_3	target_1217	TGGCCGGCAGCTCTCAGCGC
SLC25A39_4	target_1364	GTCCGGGCGGAGACGCGAGT
SLC25A39_5	target_185	GCTTGCGGCTGGTCGGCCCG
SLC25A39_6	target_900	GGCGGAGCCGGGGACACTCC
SLC25A4_1	target_2584	CCCCGGCCCAGCCTCGCTCC
SLC25A4_2	target_674	CCCCCTCCTCCCAGCTGCAG
SLC25A4_3	target_1828	CCGGCGCTCGCGCCGCGCAT
SLC25A4_4	target_2376	CCCCGCCGGGCTCTCGCGAG
SLC25A4_5	target_2229	ATCGGGGGCGAAGGCGCTTC
SLC25A4_6	target_992	CTGCAACTTGGGACGTTTAA
SLC25A40_1	target_3003	CACGAGGGGCGAGCGCGAGG
SLC25A40_2	target_1013	CGCCTTCCTCCTCCGCGCCT
SLC25A40_3	target_2553	GGCGCGCAGCGCGAGAAGGC
SLC25A40_4	target_492	GGGCGCGCGTATCGGCGCCG
SLC25A40_5	target_1180	GCACGGCGCGTGGCGTGAGA
SLC25A40_6	target_1191	AGATTTGAAAACGCGTCACG
SLC25A41_1	target_2251	GGTGGATACTTGGGGGAAGG
SLC25A41_2	target_1482	TTGTGACTTCATCCTCCTCT
SLC25A41_3	target_2058	TATTGGTTTGGGGGATCAGG
SLC25A41_4	target_3006	CCCTGTGACCTTCCTAGGTG
SLC25A42_1	target_2702	CGCACCCCCAGAGCGCGCCA
SLC25A42_2	target_225	AGAGGTGGGGCTATTGGGAG
SLC25A42_3	target_914	GCTCCCTGGCCAGTCAGCGC
SLC25A42_4	target_722	AGGGACCACTCAGGCACCCC
SLC25A42_5	target_2256	GGTCCACGCCACGCCCCGAT
SLC25A42_6	target_2093	ATTGGCGAGTATGAAGCAGA
SLC25A43_1	target_1448	GGCCCGAGGCTGGTCGGGGG
SLC25A43_2	target_1181	GCGCGAGGGCCTGGAGGGTC
SLC25A43_3	target_386	AAACAGTTACTGTTCTCTCA
SLC25A43_4	target_1598	ATATCCGCGGCCTCGGACCC
SLC25A43_5	target_1179	GCCCCGTCTACGCCCTAGCC
SLC25A43_6	target_1924	ATGGGCATAGTCTCCCCAGT
SLC25A44_1	target_1169	CAGGCGTGAGCCACCGTGCC
SLC25A44_2	target_1897	TAACGAAGGTAAAGAAGGCG
SLC25A44_3	target_1299	CTTTATATTCAAATCAAGGC
SLC25A44_4	target_1309	AAATGGGGTCACCTTGTGTT
SLC25A44_5	target_1651	CGCAGGCGCCTTAACGCTGA
SLC25A44_6	target_636	CTGGATCTTCAATAAGCGTC
SLC25A45_1	target_135	AGCAGAGAAAGCAAGGGGGT
SLC25A45_2	target_147	CCCCAGCTGGAGGGGTGCCA
SLC25A45_3	target_41	GAAGAGCCAGTCCACAGGCC
SLC25A45_4	target_164	GGCAAGAGTGCCCAGGAAGA
SLC25A45_5	target_144	GAAGAGTCTGGAGGCTCGGG
SLC25A45_6	target_64	TCAGTCAGCCTTCTGTCTCC
SLC25A45_7	target_1544	TCTCGCTCTGTTGCCCAGGC
SLC25A45_8	target_2570	GGAGTATAGTGGCATGATCT
SLC25A45_9	target_1686	AAGACAGGGGAATTGCAATA
SLC25A45_10	target_2712	AATTGGCTCTGTCTAGGCAG
SLC25A45_11	target_453	TGGCTGTACGAGAGACAGGA
SLC25A45_12	target_1922	GGGAAGGAGGAAGCCGAGGA
SLC25A45_13	target_237	GGGCTGGGCCTACCCCCTGG
SLC25A45_14	target_1460	CTGAAGAGAACAGCCAGGCC
SLC25A45_15	target_1706	GGCCACGCTACCTCCGCACC
SLC25A45_16	target_859	ACTCCCAGGAGTGACTCACC
SLC25A45_17	target_2278	CTGCCACGCAGCGGCAAATG
SLC25A46_1	target_2822	CCGTCGGCCGCCGCCGCGTC
SLC25A46_2	target_3005	CACGTGCTCCGAAGACTTCC
SLC25A46_3	target_673	GCACGGTTGCTAGGGAGACG
SLC25A46_4	target_1643	CTGACAACCGGAAGTCACGT
SLC25A46_5	target_282	TTAGGGAATAGGTGGGAATA
SLC25A46_6	target_1547	ACAACAAACTTTTAAGGTCC
SLC25A47_1	target_1975	AAGGGTCCCGGGGGCAGGGA
SLC25A47_2	target_1655	TCCCAGTGCCCTCGGGACCC
SLC25A47_3	target_2815	GGTGACAGGCACCAGAGAGC
SLC25A47_4	target_2799	ACCGGAAGCAGAGCCTGCTG
SLC25A47_5	target_816	AAATACCTGCGGCAGGGGAG
SLC25A47_6	target_2606	AGGTCTGAGAGGGGCCAGCT
SLC25A48_1	target_2030	TCTCTTAGTCCTCCCTTCTC
SLC25A48_2	target_995	GGCTGACATCACGCCCCCAG
SLC25A48_3	target_1521	TGGCAAGGAAGAGGATAACC
SLC25A48_4	target_2662	ACCTTAAAGGCACAGCACTC
SLC25A48_5	target_2562	CCTCTCCAAGTGCCGGAGGG
SLC25A48_6	target_2134	GGCTCATCCCAGACACAAAG
SLC25A5_1	target_299	CCGGGGCGGGGTCTGGGCCC
SLC25A5_2	target_404	GCTCTGCCGCCCAGCGCGCC
SLC25A5_3	target_489	ACCCGCCCCTTCCTCTCGCC
SLC25A5_4	target_798	GAGCGGCAGGCGTCGGAGGC
SLC25A5_5	target_629	AGGAGTCGTGGAGGGCGGGC
SLC25A5_6	target_2342	GGCGGCGCGGAGAGCAGTCC
SLC25A51_1	target_1285	CGCTGCCTGCAGGGGGCGTC
SLC25A51_2	target_471	CTGCGGGGCGAGCGCCTTCG
SLC25A51_3	target_295	GGCACGCTGAGGCCACCGTA
SLC25A51_4	target_1408	AAACTCCAAAGTACCCTCTG
SLC25A51_5	target_2206	AGGTTTGAAGATACTCAACA
SLC25A51_6	target_2048	GTCGGTTTTAGGGGCCTTGT
SLC25A52_1	target_2053	TCACGCTGCGCCCCCGCCCC
SLC25A52_2	target_252	GAGCAAGCCGGGACCTGCGC
SLC25A52_3	target_1016	GCGCAGACCATGACCGACCC
SLC25A52_4	target_279	TTGCCATGCTTGCTTTAAAA
SLC25A52_5	target_1731	GGTTTCTTCTCGGATCCCAG
SLC25A53_1	target_577	CGAGGCGGGGGCGGGGGAGG
SLC25A53_2	target_2512	CCGGTCTGTTTGGGAGAGCC
SLC25A53_3	target_1478	GTCTTTTTACCTGTGTTTTT
SLC25A53_4	target_1264	TCCCCAGTTTGTTTGTAAGT
SLC25A53_5	target_1801	CGTTTCGCGACTACGTCAGT
SLC25A53_6	target_671	TCTATACCAGATTAGTCGCC
SLC25A6_1	target_92	GCGGGGGCGGAGAGTGGGCG
SLC25A6_2	target_122	TGGTGTGGGGCGGGGCCTGG
SLC25A6_3	target_162	CCTCCTCGCGCCGCGCTCAT
SLC25A6_4	target_116	CCTGCGTGCCTCGCCTCTGA
SLC25A6_5	target_177	CTCCGGGGAGCGCAGCCAAT
SLC25A6_6	target_166	GCGCGGTTCGCTGGAGTGCG
SLC26A1_1	target_38	CCACAGCTGCAGCGGCTCCT
SLC26A1_2	target_110	GGAGGCTGGGAGCTCCTCAG
SLC26A1_3	target_124	ACCTACAGATTGCTGAGTCA
SLC26A1_4	target_96	TTGTAGGAGTTAGAGCTGTG
SLC26A1_5	target_103	TAATTGAACTACAGAGTCCA
SLC26A1_6	target_176	CCGGGAGTTGAACTGTAATC
SLC26A10_1	target_1108	CGAGCAGCCAGGCCCGCCAG
SLC26A10_2	target_1438	CGTGGCGCCTGCTGCTGGCT
SLC26A10_3	target_1823	CTTCGGGCTGTGGAGGCTGC
SLC26A10_4	target_2704	GCGGTGGCCGGAGTGACCGT
SLC26A10_5	target_1276	TGCACGTGCCCCAGGGTGAG
SLC26A10_6	target_1089	GGCCCTAACAGCAGCCTGTC
SLC26A2_1	target_1667	TCAGAGGGCGGCACCCTCCC
SLC26A2_2	target_304	AGGTTCCGCCGCTGCTTCCG
SLC26A2_3	target_233	TGACTCCTCCGCGGAGAGAG
SLC26A2_4	target_641	CTCCTCGCGATTGGCTGCCC
SLC26A2_5	target_1692	CAGCTTGTGCTCTTCTGTCC
SLC26A2_6	target_938	TGGTGGTAGCGTCGCTCGCC
SLC26A3_1	target_1701	TCTGCTGATCAAAGTCTCAA
SLC26A3_2	target_1411	ACAATGAAAAGACTGCAATG
SLC26A3_3	target_849	GCATAGGGATGTCTATATAT
SLC26A3_4	target_2991	TTAATCTCACAAGGAACTTG
SLC26A4_1	target_1442	CAGGGGCGGGCCAGGCCCTG
SLC26A4_2	target_1626	TTCCTCTTCTCCTCCCCATG
SLC26A4_3	target_1959	GGGATGAGTGAGGATCCGGG
SLC26A4_4	target_1355	GACCACGGACCTCTTCCTCT
SLC26A4_5	target_957	CTCTTACTGGCTGCCACGCA
SLC26A4_6	target_2558	GCAACCCTTGAGATTAGTAA
SLC26A5_1	target_1524	CGGCCGCGCCCCGCGACTCC
SLC26A5_2	target_534	GGCGGGGCCTGGCCCTAGCG
SLC26A5_3	target_1115	CGGCAGGGATGCCCGCGCCC
SLC26A5_4	target_2964	GGCTCTAGGAGGAGGCGCCG
SLC26A5_5	target_2855	CGGGGCGGGCTCGGGTTACC
SLC26A5_6	target_2850	AGCACGCTTTGGAAAGTTCT
SLC26A6_1	target_105	GGGCGGGGAGAGACTGGAGA
SLC26A6_2	target_128	AGGGCCGGGCGAGCAGCGAG
SLC26A6_3	target_152	GCTTGGGCCAATCAGCGCGC
SLC26A6_4	target_119	GGGGCCTAAGTGGCGCGCGC
SLC26A6_5	target_129	CCGGGGGCTAATCCCGGGGC
SLC26A6_6	target_77	CTGCAGTCCCATCCAGCTCC
SLC26A6_7	target_2853	GGCAGCTGGAGGAGGACCTG
SLC26A6_8	target_2497	GGAGGGAGCAGCCTGGGACC
SLC26A6_9	target_1756	ACTGGAGAGGGACTGGGTGG
SLC26A6_10	target_2829	CAGCCAGCAGTGGGCTCCCG
SLC26A6_11	target_348	TAGGACAAAGTCCCCCAAGT
SLC26A6_12	target_1143	CTGGTAGAACACTCAGCACT
SLC26A7_1	target_1702	TCACTACAACCTCTGCCTGC
SLC26A7_2	target_2160	ATAGTTTCACTCTTGTTGCC
SLC26A7_3	target_1047	ACTCGGGAGACTGAGGAGGC
SLC26A7_4	target_1406	AAAAAAGCCTGGTAAGAATA
SLC26A7_5	target_947	ATTGCACTTGCACTGCAGCC
SLC26A7_6	target_543	CAAAATCATAAAACTGCCAG
SLC26A7_7	target_1580	GTTTTTGGCTGCAATCCCAA
SLC26A7_8	target_2007	AGGTAGTTCTGGGCGTGTGT
SLC26A7_9	target_2315	TGGGCTATGCTAATGAAACC
SLC26A7_10	target_409	TGGACTAGCTGGATATTTCC
SLC26A8_1	target_141	TGGGGGAGGGGACGAGGAAG
SLC26A8_2	target_102	TCGCCTGGCTGGCGGCGCTG
SLC26A8_3	target_168	GGAGCATGAGCAGCTGGGCT
SLC26A8_4	target_74	TCTCATCTCCTCAGCCCGCC
SLC26A8_5	target_100	GCGGGCGCTGGGATCCCACA
SLC26A8_6	target_1167	GGCCTAGCCCGCGGGCGTTC
SLC26A8_7	target_612	GGAAGAGGAGCATGAGCAGC
SLC26A8_8	target_2068	GGGCTGAGGAGATGAGAGTG
SLC26A8_9	target_770	GGGCTAGGGAGCCAGGAAAG
SLC26A8_10	target_1475	AGGTATGAGGAGGGCGACCC
SLC26A8_11	target_1932	GATCAAGAATAGCAAAACCT
SLC26A8_12	target_2487	GAGAAGGAGCCTTGGTATAC
SLC26A8_17	target_1821	ACCTGGCTCCTTGGCGGGGG
SLC26A9_1	target_1693	CTCTGAGCCAATCAGAAGCC
SLC26A9_2	target_768	GGGCTCACCCCGTGGCCCTG
SLC26A9_3	target_1971	AAAAAAAGGGCTGTTCATTT
SLC26A9_4	target_2587	GGAGATAGGAAAAGGAGATA
SLC26A9_5	target_434	GTTATTTATAAACGCCTCCC
SLC26A9_6	target_1837	CTACACCATAGCTAAGCCTG
SLC27A1_1	target_1615	GGGCGGTCGTGGGGCGGAGC
SLC27A1_2	target_2339	GGCGCAGAGCCGAGGCCTGG
SLC27A1_3	target_807	CCGAGTCAGACTCCGCCCCC
SLC27A1_4	target_2144	CGCGTTCCCGGACTCGCGGG
SLC27A1_5	target_2785	AAGGGGCGATGCCTGGCCTG
SLC27A1_6	target_517	GAGTTGACCAATCCCAGGCC
SLC27A2_1	target_720	AGGGCAGCCTGCCCAGCCCC
SLC27A2_2	target_657	CGGCTGAGCCCGCCCCCTTG
SLC27A2_3	target_2543	TGGGAAGTGGCCGAGGCTCC
SLC27A2_4	target_486	GGGGCAGCCACCTGCTCTCC
SLC27A2_5	target_2907	GAGGACCGCGTGGGAGGGCC
SLC27A2_6	target_405	TGGAGGTCTGGGGTCAAGTC
SLC27A3_1	target_2738	GGGGGAGGGCTGGGAGTCCG
SLC27A3_2	target_2352	GGAAGGCGCGAGCACCGCCC
SLC27A3_3	target_1628	GCTCGCACCCTACCAGGTCC
SLC27A3_4	target_533	GCTCCCTCCCGGACTGCTCG
SLC27A3_5	target_311	TAGGGCGGAGCGTAGGCTGT
SLC27A3_6	target_2184	TTCTAAGTTGTTTCTCGGCT
SLC27A4_1	target_1043	CTGGGGCTGCGCTGCGCCGC
SLC27A4_2	target_1202	GGCGCCGCCGCGCGGCACGC
SLC27A4_3	target_2896	TCGGCAGGGAGGAAGGGCCG
SLC27A4_4	target_391	GGCTGGGGCCGAGCGGCGTC
SLC27A4_5	target_949	GAGTCCGCGAGGAGACAGGC
SLC27A4_6	target_2771	GGGGTCTCCTCGGCTGGGTG
SLC27A5_1	target_381	CAGTGGCTGGTCCTCTCCCC
SLC27A5_2	target_384	AAGGGCTGGGGGCAAAGTCC
SLC27A5_3	target_753	TTCCCAGGTCTCTGCCCCTT
SLC27A5_4	target_1155	CTGGACCCACACACAAGACC
SLC27A5_5	target_2060	GGTTAGCGCCAGGCAGAGAG
SLC27A5_6	target_1642	GACAGCAGGAAGGAGGCTAG
SLC27A6_1	target_134	GGGGCTGGGCGGGGCAGGAC
SLC27A6_2	target_67	GGGGCGGCGCTCAGGAACCC
SLC27A6_3	target_173	GCGAGCTGCGGCTGGGGTAG
SLC27A6_4	target_170	GTCCGTGGCCTCAGGGCCAG
SLC27A6_5	target_97	GACCCACGCGCCCGCTGGAA
SLC27A6_6	target_52	GGTCCCGGAGAACTGCTCCT
SLC28A1_1	target_1183	ATGGGCTGTGTGTCTTGGGG
SLC28A1_2	target_438	ACCTTGAGCTTGGAGCCCAA
SLC28A1_3	target_297	GTACCTGGCAGGGAGTCAAG
SLC28A1_4	target_1452	TTGCTGCCTCATCTGGTGGT
SLC28A1_5	target_805	TTAACTTTGGCAGTCAGGAG
SLC28A1_6	target_1090	AATCCTTGTTGTAGAGATTA
SLC28A2_1	target_661	AAGCTCAGCTGCGAGGGAGG
SLC28A2_2	target_716	GGGGCAGCTTGGGTGGGGCA
SLC28A2_3	target_2122	TGTTTTTAAGACTGTTTTGC
SLC28A2_4	target_1382	GCCTAAGACTTATGCAGAGG
SLC28A2_5	target_302	AGGGCAGGCTCAGCGAAGGA
SLC28A2_6	target_1281	ACATAAAACTAACCAATGGC
SLC28A3_1	target_569	CTCTCTGCCCCACCCCAACC
SLC28A3_2	target_2036	CGGGCGGGTTGGCGGGGTGG
SLC28A3_3	target_973	TTCTCCCCAGGAGTGCAAAT
SLC28A3_4	target_685	TGTGGTGCACAAAACAGAAA
SLC28A3_5	target_2876	GATGCCAAAAATGGGGATAA
SLC28A3_6	target_1322	AAAAGATTAATAAGGTGGGC
SLC28A3_7	target_2450	GGGAGCTGGGGCCTGGAATG
SLC28A3_8	target_1996	CAACTCAGCCACAGCAGGAT
SLC28A3_9	target_274	GTCCTTTCCTTCAAGGTGGC
SLC28A3_10	target_776	GAGGACTTTGTCTTGCATCT
SLC28A3_11	target_1733	ATGCTGAATGCTGGCCGGAC
SLC28A3_12	target_2652	GTGTGTCTAGAAATGTCATC
SLC29A1_1	target_2009	GGGGAGGGGCAGAGAGAAGG
SLC29A1_2	target_2683	AGGCGCCGGCCGCCAGTCCC
SLC29A1_3	target_2239	GGGACGGGGTTAGGGGCCCA
SLC29A1_4	target_2219	GGGCACCCGAGGCTCCGGAA
SLC29A1_5	target_1855	TGGGTCGCCTCCCTGAGACC
SLC29A1_6	target_2390	TAGTGAGCAGGGACGGCGTG
SLC29A1_7	target_2595	GCAGGGGTGGGCCGGGGGCG
SLC29A1_8	target_400	GGGGCTCGGGGTGGGAGCGG
SLC29A1_9	target_1834	CGCGCGGAGTCGCCGCGGGG
SLC29A1_10	target_1435	CCAGGCGGCCCTGGGGGCGC
SLC29A1_11	target_969	CAGACAGCCTTGGTGTGGCA
SLC29A1_12	target_2428	GAGGGTACAGCCACACATTA
SLC29A1_13	target_509	GGGGGCGGGGCCGCGGGCGT
SLC29A1_14	target_2227	GGGGAGGTGGCAGTGGGCGC
SLC29A1_15	target_1175	GGTGGGAGCGGCGGAGCGCG
SLC29A1_16	target_2827	GCGGGGTGGCAGGGGTGGGC
SLC29A1_17	target_2766	GGGCGGGGCGAGCTCAGCGG
SLC29A1_18	target_1661	CTGCAGCTTCCCTCTCCCGC
SLC29A2_1	target_617	GCTCGGGCCCCGCCCCACCT
SLC29A2_2	target_401	CTCCTTCCCCCACCCGCCTC
SLC29A2_3	target_2941	GGCTGCGGGGAGGGGCTGTG
SLC29A2_4	target_353	GCCCCCGCGGAGAGGACGGG
SLC29A2_5	target_1621	GGGGAGCGGGCGGGTTCCGC
SLC29A2_6	target_1357	GGAAGGCGGGGGTAGGGACG
SLC29A3_1	target_1221	GCGAGGGGCGGGGCGGGGCC
SLC29A3_2	target_2164	CGGCAGGCGGGCTCCTCCCC
SLC29A3_3	target_1715	AAGGGGGAGCCCCGGCGCGC
SLC29A3_4	target_2410	TTTTTTCCTTTGTCTTCTGC
SLC29A3_5	target_2731	GTTTGCAAACGGGGAAGCGG
SLC29A3_6	target_2870	CCTGCGTGCGCCCATTTTAT
SLC29A4_1	target_1313	GGAAGGGGGAGGGGAGGGGG
SLC29A4_2	target_2317	GAGGAGGGAGGGGCGGGGCC
SLC29A4_3	target_2482	GAGGGGGAGGGAGGAGAGGA
SLC29A4_4	target_1464	AAGAGGGAGGAGGAGGGGGG
SLC29A4_5	target_529	AGGGAGGAGGGAAGAGGGTG
SLC29A4_6	target_625	GCGGGGGGCGGGCAGAGGCG
SLC2A1_1	target_2705	GGGATGCGCGGAGTAGCGGG
SLC2A1_2	target_2605	GCTGGACTGGAGTTCTCACT
SLC2A1_3	target_743	AGTGCACCGAAGTCACCCAG
SLC2A1_4	target_2451	TAGTAACAGTACCACCTCGT
SLC2A1_5	target_2993	TTAGAACAGCGTCTACTGCA
SLC2A1_6	target_1894	CTTGCCTTACAGCCGGGTAC
SLC2A10_1	target_2730	GGAGGGACAGAGGCGGGGGC
SLC2A10_2	target_2842	TTGCCAGGCCTGGGGCGGCC
SLC2A10_3	target_1426	TGCGCGCGGGAGGGCAGGGC
SLC2A10_4	target_895	AGGCCCCGAGGCCTGGAGGC
SLC2A10_5	target_2488	AGGACAGTGGGCGAGGGAGG
SLC2A10_6	target_705	GGGGAGCCCAGGACCGCCCC
SLC2A11_1	target_1852	GTAGCTCTATTGCTCAGACT
SLC2A11_2	target_480	TCTGCTCAGGTGACTTCTTA
SLC2A11_3	target_2612	GCCCATCACAGTGTCTGCTC
SLC2A11_4	target_2975	CCCTGGCGGCAACCCGAGAC
SLC2A11_5	target_1353	CCTGGGCAGAGCGAGAGACT
SLC2A11_6	target_711	CGGAATGCGGGTAGGAGAAC
SLC2A11_7	target_1381	AGAGCGCTCCGAAGACTGGT
SLC2A11_8	target_2035	CGGACCTGCCTCTCACGCAA
SLC2A11_9	target_2098	GCTGGGGGCACTTGGAGTTG
SLC2A11_10	target_1553	GGGCGCCTGAGGCGCATGCG
SLC2A11_11	target_1594	GCGCGAACCCTCAGCTGGTG
SLC2A11_12	target_1829	AGCGCAGTGGGTATTGAGAG
SLC2A11_13	target_374	TGCGCCTGAGCTTGAGTCTC
SLC2A11_14	target_2000	GCAGAGCCGCTAGAGTGTCG
SLC2A11_15	target_2318	CGCTACAGCTTCGTCTCGAC
SLC2A12_1	target_463	GGGGGAGGGCCGTGAGTCAG
SLC2A12_2	target_990	GAAGCAAGGGGTTAAAAGAA
SLC2A12_3	target_247	CAAGAGCTACCCTTAGCTAA
SLC2A12_4	target_477	TTTGCCTTTAGATGCAGAGT
SLC2A12_5	target_704	ATTCTAGCACCTTTGAAAAG
SLC2A12_6	target_1611	GGGAACTCAGACGGAGTGTT
SLC2A13_1	target_2280	CCGCCGCCACGGCCGCTCCG
SLC2A13_2	target_2276	CCCGCCGCGCTCCGACGCTG
SLC2A13_3	target_2253	AGCCGGGAGGAAGAAAGCGG
SLC2A13_4	target_2747	TGCTGCCGTGGCAGCCGGAG
SLC2A13_5	target_1290	GCAGCGGCGGTTGCTCCCGC
SLC2A13_6	target_1038	AGTGTGGAGTGAGACCCGCC
SLC2A14_1	target_146	GGTGAGAAGCCGGGAGGGGC
SLC2A14_2	target_123	GGGATCCCCAGCAGCCGCCG
SLC2A14_3	target_111	ACGCCTGAGGGGGCGCTCGG
SLC2A14_4	target_106	GAGTTCCCCCGCCCGGTCGC
SLC2A14_5	target_87	GGCTGGACCGTGCGGTGCGC
SLC2A14_6	target_133	GGCTCGCGGTCGGGGTTGTC
SLC2A14_7	target_901	GGAGTGCAGTGGCACAATCT
SLC2A14_8	target_2287	GGTCTCACTGTCACCCAGAC
SLC2A14_9	target_330	CTAAGAGTTTACTTTCTGTT
SLC2A2_1	target_1697	ATTTCAAGGCATGTGTTATG
SLC2A2_2	target_989	TGAGCTGCCGTGCTGTGCTG
SLC2A2_3	target_2492	CTGGTGAAAAGAGAAATCTT
SLC2A2_4	target_470	CTGTTTAGAGCTGAGCTGTG
SLC2A2_5	target_2489	TCCACAGATAATTAGTGCTG
SLC2A3_1	target_2474	TGTCTGTGGGGCGGGGGCGG
SLC2A3_2	target_855	GTGGAGAGAGTGGAAGGATG
SLC2A3_3	target_1529	ATTAGAAGAGGGAAGGAGTA
SLC2A3_4	target_978	TTTAAGAGAGGGGGGAGGGA
SLC2A4_1	target_2173	GGGCAGGAGCGAGGTGGCGG
SLC2A4_2	target_1340	GCCACGCCCCTCCGCGTGGC
SLC2A4_3	target_1678	GGAGGGGGCGTGGCCTTCTG
SLC2A4_4	target_1591	TGTGAAGGGCGTGGCCCGCG
SLC2A4_5	target_2348	GTTGGTGGGGCGGGCCAATG
SLC2A4_6	target_1439	CCTGGGGTTTAGAGTTTGGC
SLC2A5_1	target_2792	TCTGTTGCCCTCAGATTACC
SLC2A5_2	target_3004	TGACTGTAGTTTTCCTGGCA
SLC2A5_3	target_1361	CCTCCACCCTACATGACACC
SLC2A5_4	target_1402	TTATTTCTGTCAGGAACGCA
SLC2A5_5	target_1567	AGCATCTTTGAGGTCTCTAG
SLC2A5_6	target_1685	TCATTCACCATGAGCCTGAC
SLC2A6_1	target_2684	GGCCGCTATTGGCTGTGGGA
SLC2A6_2	target_262	ACGCGGTGCCGGCCGCGCCC
SLC2A6_3	target_2588	TCCCAGGGCGGAGCCCCTGC
SLC2A6_4	target_752	GGATGCGGACCCGGCTTCCC
SLC2A6_5	target_334	CCGCAGGCTGTCCTGATGCT
SLC2A6_6	target_2399	TCTTGGGGCGTGACCTTCGG
SLC2A7_1	target_2755	AGCAGGGTCCAGAGAGCAAA
SLC2A7_2	target_1506	CAGAGCAGGTGTCACTTGGG
SLC2A7_3	target_1069	CCTTGTTCAGGTGGGAGAAC
SLC2A7_4	target_2346	CCCCAGGAGCAAATTCTCCT
SLC2A7_5	target_1072	ATAAAGCCAGGTAGGCCCAG
SLC2A7_6	target_1082	ACAGCCGGTCTTTAGGTGGC
SLC2A8_1	target_1392	CGGGGGGTGGGGGACGGTGC
SLC2A8_2	target_812	AGCGCGCTGGAACCGCCCCT
SLC2A8_3	target_1847	GAGCAGCCAATAGGAACGCA
SLC2A8_4	target_218	TCTGCTTTAATGTGAAGGGC
SLC2A8_5	target_1609	GCGGGGCTAGCGAATCAGCT
SLC2A8_6	target_748	CGGGATCGGAACCGCAGAGC
SLC2A9_1	target_1486	GGAGGGCGGGAGTTCCTGAC
SLC2A9_2	target_2609	AAAAAAAAAATTCCACCCCC
SLC2A9_3	target_2893	AGTGAGGAGGCAGAGTCCAC
SLC2A9_4	target_553	CCTCTCCAGGATTGCCACCC
SLC2A9_5	target_2455	AGCAATGAAACAGTCCAAAA
SLC2A9_6	target_2282	CAATTTGATCATGCCTGAAC
SLC2A9_7	target_2959	TGCCAAGCAAAGAAACAGAA
SLC2A9_8	target_1638	TTTATTCACTCAGTTCCTGT
SLC2A9_9	target_1003	CATTAAGTAACCCTCTTTCC
SLC30A1_1	target_1275	CGCGGCGCGGCGCCGCCGGC
SLC30A1_2	target_934	GGCGGCGGTGGCGGGGAGCT
SLC30A1_3	target_1933	CCTGGGTGTGGGGGCTGCTG
SLC30A1_4	target_841	GCTGAGCCGGGCCTCGGCGC
SLC30A1_5	target_954	GCTCTTGGTACCCCGGCTCC
SLC30A1_6	target_920	GGGGCTCGGCGGCTTGACCC
SLC30A10_1	target_2648	GGCCCTTTTCCCCTCCCTCG
SLC30A10_2	target_1885	CGGAGGAGAGGGGGCGTGTC
SLC30A10_3	target_2972	AGCCCGTGCACCGCCTCCCG
SLC30A10_4	target_795	CAGACTCCCTCCCCATGCAG
SLC30A10_5	target_604	CCTGGGCCTGACTTGGCAGG
SLC30A10_6	target_1994	GGGACAGGACTGTGCAGAGA
SLC30A2_1	target_1149	GGGTCAGCCGCTGCGCCCCG
SLC30A2_2	target_568	GGGGAAGGGGGGGCGGTCGC
SLC30A2_3	target_1770	GGCGCAGGCACAGGTGTGCG
SLC30A2_4	target_678	GTGGGCTCCGCGGGCCCCAT
SLC30A2_5	target_1753	GGCTGCAAAAGGCCCGGCTG
SLC30A2_6	target_1029	AACCCGTGTGAAGCTGCCGT
SLC30A3_1	target_2671	GAGCCTGGAGGCGGAGCTTG
SLC30A3_2	target_2998	GGGACGGGGCTGTGGAGATG
SLC30A3_3	target_1579	CTCGGGTGGCGGGGCGCTCC
SLC30A3_4	target_1797	GGGCTTTGGCAGTGGGGGCG
SLC30A3_5	target_1600	TTAAGGGTGGGGAGAGGCCG
SLC30A3_6	target_2163	GGGCTCTGGCGCGGGGAAAT
SLC30A4_1	target_546	GGGCGAGGCGCGCGAGGGAG
SLC30A4_2	target_373	GCGCCCCGCCTCTCGCCCCG
SLC30A4_3	target_2326	CCACTGCGCCGCCTCCGCCC
SLC30A4_4	target_2981	GCGCCCCAGCCCTGCGCGCC
SLC30A4_5	target_2623	CGCGCGCCCCCGCCCATCGC
SLC30A4_6	target_235	GCGAGGCCACGCGCGTGCGC
SLC30A5_1	target_688	CCGCCTCCTATCAGCCTCTC
SLC30A5_2	target_802	GCCCTCCCCCTCTGCCCTAC
SLC30A5_3	target_1158	CTCGCCTTTCCTCGTCCCTT
SLC30A5_4	target_2106	TGTCCCTACAGTGCCACCTA
SLC30A5_5	target_1543	GGAATCCGCTGTACTTCTGA
SLC30A5_6	target_2018	AGTGCACAGGGAGCGCCACC
SLC30A6_1	target_1204	GCCGGGAAGGGGACGGAAGC
SLC30A6_2	target_785	CTCTGAGCTCTCCGAGAGAT
SLC30A6_3	target_976	TCCCTGCACTCCGTGGCGGA
SLC30A6_4	target_415	GGCTGTGAGGAAAGCGTGGG
SLC30A6_5	target_1698	GTGGGGCACCAGTGGGCGAT
SLC30A6_6	target_2496	GAAGTGCGTGCTCTGGCCTC
SLC30A7_1	target_2362	GGTCGCGGGCGGGGCCTGCG
SLC30A7_2	target_2678	GCGGAGGGCGTGGCTTGCGG
SLC30A7_3	target_320	GGGCGGGATGAGAAAGGTGC
SLC30A7_4	target_2272	GCGTCCTGGGACAGGAAAGG
SLC30A7_5	target_113	TGTGAGGGGCTGACCTGGGA
SLC30A7_6	target_153	GGAGCTGTTGGAGGGACGCC
SLC30A7_7	target_2392	GGCCTGCGCGGCGGAGGGCG
SLC30A7_8	target_1684	GGAGGGAGGCCGGTCGCGGG
SLC30A7_9	target_2797	CGGCGGGGGCGGGATGAGAA
SLC30A7_11	target_2373	AACGCGTCCTGGGACAGGAA
SLC30A8_1	target_1560	GCGGGAACCTGGGCTGCGCG
SLC30A8_2	target_2267	GAGGTGTGGAGGGAGTGGCG
SLC30A8_3	target_877	GAGCCAGCTCCCTCTGCTTG
SLC30A8_4	target_2995	TCGGCCTCGGCGTCCGCTCT
SLC30A8_5	target_1566	CCTCTCTGGGCTGGCCAATG
SLC30A8_6	target_1100	GAGGCGCTGAGAGCGAGCAA
SLC30A8_7	target_1982	AAAGCAGTTGGTAAACTGTA
SLC30A8_8	target_801	GCACCTGGTAAATTATAAAC
SLC30A8_9	target_1606	CACGGCACACCTACTTCAGC
SLC30A8_10	target_245	GGTGGGATTGTCAGGGTCAG
SLC30A8_11	target_2667	TTTACGGTTTACAGTTTACC
SLC30A8_12	target_2214	GAAATCCACCAGTATTTTAC
SLC30A8_13	target_402	ATTCAATTGTGCTTTCTAAG
SLC30A8_14	target_2872	TTGCTACAAATTGCTGATGT
SLC30A8_15	target_2657	AATTAGTTTAGTGTAGCGAA
SLC30A8_16	target_535	TTTGACCTTCGGAGCACACG
SLC30A9_1	target_497	GTCTGGGTCCCCGGGAAGGA
SLC30A9_2	target_1138	AGCCACGCCCTCCCCACTTT
SLC30A9_3	target_2927	AGTACAGGTGCAAAAGAAGA
SLC30A9_4	target_1571	TTTAGCGACGCCTGCCGTGG
SLC30A9_5	target_2519	GTAACACGTTGAGCACCAAT
SLC31A1_1	target_1288	CTCTGGAGAAGGTGGGGCAA
SLC31A1_2	target_1665	CGTGCTGGAGTTCGCCCTGC
SLC31A1_3	target_2518	TGTGAAGCTCCGCCCCGCTG
SLC31A1_4	target_2320	CGCGGCGGCGTGCTGCTTTC
SLC31A1_5	target_2190	TGGAGAGGCCTGACGTCACT
SLC31A1_6	target_844	CTCTGGACCGAAAGTAGACT
SLC31A2_1	target_2429	GGTCCGGGCGAGGCGGCGCG
SLC31A2_2	target_1554	GCGCCCCCTGGCCGAGACCC
SLC31A2_3	target_1490	GTGTGGGGACCACAACTCCC
SLC31A2_4	target_2170	AACGCCAAGCCTCAGCCCTT
SLC31A2_5	target_645	CGCCCTACTTCGGCGTCCTC
SLC31A2_6	target_1151	GGAACCTGGGGCGAGGCGCC
SLC32A1_1	target_2016	GCTGCGGAGGGCGGCGGCGG
SLC32A1_2	target_2583	GCGGTGCGGGGGTGGGGGAT
SLC32A1_3	target_1350	GGGGACGTGAGGAAGGGGCT
SLC32A1_4	target_1220	CGCTCCCGCCCCTCGGAATC
SLC32A1_5	target_342	GAGAGGAAATACCCGGAGGC
SLC32A1_6	target_2495	TCAGAGCAGCTACGCGAAGC
SLC33A1_1	target_2695	GTTTGGGCGGCGCCCCGCCC
SLC33A1_2	target_2875	CACGCTCTCGTGGCCCAGTT
SLC33A1_3	target_1725	ATTGGCTTGCTCTGGAGGCT
SLC33A1_4	target_1939	GGCTGCCGGAACCTTCGGGG
SLC33A1_5	target_214	TTGGTGGGAACCTGCAATCT
SLC33A1_6	target_1400	AGGCCCTGTGACAGCGACTG
SLC34A1_1	target_2180	GAGGTTAATTGGGGGACAGA
SLC34A1_2	target_341	GACCCTCCTCTTTATACTCT
SLC34A1_3	target_2182	GGAGGGCAGCTAGGGTTCCA
SLC34A1_4	target_632	TTAACTGGGAGGAATCTCAG
SLC34A1_5	target_1629	GTGTCTGGGTCGTGGTTGAT
SLC34A1_6	target_2544	TGCTAATCGTCAGCTCTGCA
SLC34A2_1	target_2601	GCGGCTGCGGCAGGCGGTCC
SLC34A2_2	target_1032	CGCTGCGCGGAGAAGACGCG
SLC34A2_3	target_2813	ACGGGCCCCGCCGCGCGAAC
SLC34A2_4	target_2541	GCAGGTAGGCAGTGCCCCGG
SLC34A2_5	target_1618	TTTTCTCTCGGCAGCCTGGC
SLC34A2_6	target_1462	TGCGAGGGGCGTGATGACAG
SLC34A2_7	target_1961	CGCTAGTCCCTGTGAGCCCC
SLC34A2_8	target_1573	AGAATGGAAGACGGCAGCCC
SLC34A2_9	target_2614	CTAGGTTTGTGGTGGCTGCC
SLC34A2_10	target_1625	GGGGGCAGTGTCACATCACC
SLC34A2_11	target_208	TGCAGTTATTTAAGGTGCCT
SLC34A2_12	target_781	GAAGGGGAATGCGACATCTC
SLC34A3_1	target_2033	GGCACTGCGGGGCGGGGCAC
SLC34A3_2	target_852	AGGGTTGGGCTGGGGCTTGG
SLC34A3_3	target_2092	CTGGAGTGGGGCTCCTCCCA
SLC34A3_4	target_910	GGATGCCCAGTACCGAGGGC
SLC34A3_5	target_2277	CCATACTCTAGCATCCTGCC
SLC34A3_6	target_2644	CTGGGTGGAGTGTGTCTCTT
SLC34A3_7	target_599	CTCCTGGCCCCAAGGCCCCT
SLC34A3_8	target_1450	CCCGTGAGGGCCTGGGCTCC
SLC34A3_9	target_2939	GGTGGTGAGGGGGCACCTGC
SLC34A3_10	target_538	AGAGTGACAGGATGGAGACA
SLC34A3_11	target_2367	CACGGGGCGGGAGCAGTTGC
SLC34A3_12	target_483	GAGCCCATTAATGTTTACCC
SLC35A1_1	target_2325	AGAGCGCCTCGCCGGCCTCC
SLC35A1_2	target_2158	GGCCTTCCCGGCCGCGTCCT
SLC35A1_3	target_1147	ATCCAAGCTACACCCCAAAA
SLC35A1_4	target_1881	GGTGACAGGTGTGTGAAATT
SLC35A1_5	target_350	GGAGAACGCGGATCGAAGGG
SLC35A1_6	target_1914	GTCATAGAGACGAAGCCGCT
SLC35A2_1	target_527	CTCGCCCCCTGGAGAGCACA
SLC35A2_2	target_2691	ATAAAGAGCCGAGATGAAAG
SLC35A2_3	target_1348	CGCTTTCCCGTCTTCCAGCG
SLC35A2_4	target_1428	AGAAACTACCAGGTGCTTCA
SLC35A2_5	target_1395	GTGGCTGAACCAATGAGTCT
SLC35A2_6	target_1128	ACGGAAAGGGCGGCGCCTTA
SLC35A3_1	target_2598	TTGGGGCAAAGAACCCTGAG
SLC35A3_2	target_1234	AGATGGAGTGACACTCGTCG
SLC35A3_3	target_738	GCCAAGGTGTCCACTGCGTA
SLC35A3_4	target_2838	TGACAGTCACTTTTAGGAGA
SLC35A3_5	target_2454	GCAAACAGACAGTCCCGCAG
SLC35A3_6	target_1569	AGTAGGGGTGGGAGCAGATG
SLC35A4_1	target_2012	GCCCTCCGTAAAGATGGCCG
SLC35A4_2	target_2361	CAGTCGGCACGAGGGAGGCG
SLC35A4_3	target_2183	AGGGGGAGGTGCTTTCCTAG
SLC35A4_4	target_2804	AGGCACTTCCGGAGCATTTT
SLC35A4_5	target_319	CTCGACGGGAGGGGGTCACG
SLC35A4_6	target_1916	CGTGTGAGCGCACTCACGAC
SLC35A5_1	target_2849	AGAAAGGGGCCGGGCTGGGG
SLC35A5_2	target_2536	GGCAAGAGAGTGAGAAGGAA
SLC35A5_3	target_2094	CCCCGGTGGCGGCGCAGCTA
SLC35A5_4	target_2291	GTGCGTCCGCTTCTCACCTC
SLC35A5_5	target_525	CGAGGACAGACAGCTCGCAG
SLC35A5_6	target_2666	TGCTTCACTCGCGCCCCTTC
SLC35B1_1	target_273	TGGAAAAATCTCCAGGGCGA
SLC35B1_2	target_376	GGACCTTGGCTCCATCCCTG
SLC35B1_3	target_1666	CTCGAGGCTGCCGGTTCCCC
SLC35B1_4	target_2296	GAAGTGGTTGCTGGGTTCTG
SLC35B1_5	target_1864	GCATGCGACCGCTGTCCAGC
SLC35B1_6	target_1150	CAGTTCTGGTAGTGACTGCT
SLC35B2_1	target_3	CCCGCGCCCAGGGGCAGCCC
SLC35B2_2	target_31	GCCGCGACCACGCAGCGCCC
SLC35B2_3	target_18	TCTGCCTCCGGGCCGCGCGG
SLC35B2_4	target_14	CTGTGGTCCGGCGGCGGCCC
SLC35B2_5	target_1	CGGCTTGGGTTCCGGGGACC
SLC35B2_6	target_28	CGGGCGCCTCTTCAGGGCTG
SLC35B2_7	target_118	CCCGCCGCCGCCTCCAGGAG
SLC35B2_8	target_80	CGCAGGGGGCGCGCGGCCCG
SLC35B2_9	target_156	GCCAGCGAGCCAGCGGCCAG
SLC35B2_10	target_101	GGAGGGAGGCGGGAAGAGCG
SLC35B2_11	target_130	CTGCTGCCCTAGCCCCCACC
SLC35B2_12	target_120	GTGGGGTGGAGGGGGAACCG
SLC35B2_19	target_2216	GTGGGCGAGGAACGCGGGCG
SLC35B2_20	target_2778	CCCACTTCCCATGATCTTCG
SLC35B2_21	target_1552	GATGGGGGCAGAGCATTAGG
SLC35B2_22	target_2196	GGGATGTAAGGATGAGTAAA
SLC35B2_23	target_1077	TCTCAGTTCCTCTAATTCAC
SLC35B2_24	target_2908	CGCCCGCTGTGAAGCCCCAC
SLC35B3_1	target_2934	GCGTGGCCCCGCCTCCCGAC
SLC35B3_2	target_2353	CCTGTGTGGCCGGTGGCGGG
SLC35B3_3	target_2751	AAGGCGACCCTCGCACCGCC
SLC35B3_4	target_916	ACGCTAGGCCGGCACTGCCT
SLC35B3_5	target_2515	AGAGCATGCGCGGGAGGTAA
SLC35B3_6	target_813	GTCGGTGAGCGCCGATCTGC
SLC35B4_1	target_1473	TCATTTCCCAGCAAGACCCG
SLC35B4_2	target_1346	GTTACTTTCAGCGCTCTGGG
SLC35B4_3	target_2056	CAAGTTTGTTGTGACCCTGG
SLC35B4_4	target_433	GCAAGAAACACTGACGCTTT
SLC35B4_5	target_1714	CCCGGCATGACTCGCGCGAT
SLC35B4_6	target_2776	ACAGAGCTGTGACTGCTCGT
SLC35C1_1	target_1989	GACTTCCCAGGCCCCGGCCC
SLC35C1_2	target_1247	GAGGGTTCCCCGCCCCTTCC
SLC35C1_3	target_2112	TCCTGGTCTCCCCGGCTGCC
SLC35C1_4	target_858	GATTCTTCCAGCTGGCAGTG
SLC35C1_5	target_2852	GGGCAGGCCACTTTCTCCGA
SLC35C1_6	target_2118	CCTGTGGTCTGCCACTCACC
SLC35C1_7	target_620	GCAGGGGCGGGGCTGGGGAC
SLC35C1_8	target_2706	CTCCGCTGCCCGCTGCTGGC
SLC35C1_9	target_984	AAGCGACAGCCCCAGAGAGG
SLC35C1_10	target_224	TTGAGCCTCGCCCTGCTTCC
SLC35C1_11	target_2255	AAGGGCAAGGCGGGGCGTGC
SLC35C1_12	target_1592	GAGGTTGATGGAGCCCTTCC
SLC35C2_1	target_561	GGGGCGGGGCAGCACGGGGG
SLC35C2_2	target_2459	GCGGAGCCGGGGCGAAAAGG
SLC35C2_3	target_1658	GCCGGAAGCTACCCAGGGGC
SLC35C2_4	target_1868	TGTCCTCCGCGAAGTCCCTC
SLC35C2_5	target_1295	GAGAGACGCAGACAATTACA
SLC35C2_6	target_1472	TCTGTTGTGGTCGGGTTCTG
SLC35D1_1	target_2286	CACCAGACTCCCCACGCCCC
SLC35D1_2	target_1342	CGTGCTCGTGCGCAGGCGCA
SLC35D1_3	target_1445	ACCCTCCTCCCCTCTGTTAC
SLC35D1_4	target_566	CTCTCCGCGGGGCGCGTACC
SLC35D1_5	target_219	GTGTACTGTAACTACTTGGC
SLC35D1_6	target_777	GGCTGGAAGGCCGTATTCTC
SLC35D2_1	target_1037	CCGCCCCCTGCGAGCGCCCG
SLC35D2_2	target_2005	CGCGCAGGGTCCTCCCGCGC
SLC35D2_3	target_1195	CGGCAGGAACAGGAAGAGCC
SLC35D2_4	target_1968	CTGGTTCCAGGCACCTCCTT
SLC35D2_5	target_2192	CTCCAGGGCCGGCAATGCGC
SLC35D2_6	target_1808	GAAAAGCGCTGCCTTCCTCC
SLC35D3_1	target_696	GGCGGGGGGGCCGGTCTGAG
SLC35D3_2	target_2374	GTCCGACTGCCCCGCAGCTC
SLC35D3_3	target_313	GGGGAGGCAGTGACGAGGGC
SLC35D3_4	target_762	GCGGTGGGTTGTGTCCCGCG
SLC35D3_5	target_894	TAGCGACAGCTATTTGTAAG
SLC35D3_6	target_1240	GGGACTCCGAAAAGTGGCAG
SLC35E1_1	target_672	GCCCCGCCCCCGCCCGGCGT
SLC35E1_2	target_2715	GGGCGGGGGGGCAGGCGCCC
SLC35E1_3	target_1737	GCTTCCGGCCTCGGCTCCGC
SLC35E1_4	target_502	CGCGGAGGGATGACGCGAGG
SLC35E1_5	target_907	GTGGTGGCTGGCGCGTCGGC
SLC35E1_6	target_1593	AATGGGAAACGGCGTAGACC
SLC35E2B_1	target_2285	CTCAGCGTCCCCTCCCCCGT
SLC35E2B_2	target_1538	CTGCGTGTTTCCACCCCCGT
SLC35E2B_3	target_2249	ACGGCCCGGGCTGGACCACC
SLC35E2B_4	target_1927	TGCTCGGGCCCTTCCACTGC
SLC35E2B_5	target_1635	TTTTAAGGTCTAGGGTAACA
SLC35E2B_6	target_2126	AGTGCCTCTCCGCTGCCGCC
SLC35E3_1	target_2510	CCGCCCGCAGCCACGTGACT
SLC35E3_2	target_1967	CGGCTCGGGGGCGGAAGCAC
SLC35E3_3	target_2150	GAACGGCCGCTACCCTGCGC
SLC35E3_4	target_1955	GGGTCGGGGACCCAGAGGAT
SLC35E3_5	target_773	ACGCAAGCGTCGCGCGCCCA
SLC35E3_6	target_432	GTAGGCGTTAGGTGACCAAG
SLC35E4_1	target_1024	GGGGGAGGCAGAGGCGGAGG
SLC35E4_2	target_1481	CCCCAGCCAAGCCCCGCCCC
SLC35E4_3	target_1467	TCCGGGGGCGGGGCTTGGCC
SLC35E4_4	target_291	GTGTAGGGAGCGGGCGGCGG
SLC35E4_5	target_1617	GCCGGGCCTGAGCTGGAGCC
SLC35E4_6	target_1297	CTCCTGCTGCGACTCACGCC
SLC35F1_1	target_186	GGAAGAGCCGGGGCGGGCGG
SLC35F1_2	target_2491	GCGCGGGGGCGCGGAGCTGC
SLC35F1_3	target_729	CGGCGGCGGCACGGGCGCGA
SLC35F1_4	target_2825	CGAGGAAACAAGGAGAAATC
SLC35F1_5	target_1028	ACTCCTTCCCCGGAACCGAC
SLC35F1_6	target_2685	GCCCCGCGAAGTGGCTGCGA
SLC35F2_1	target_1713	CGAGACGGGTGGATCACCTG
SLC35F2_2	target_2828	CACCTGTAATCCCAACGCTT
SLC35F2_3	target_1890	AGAGTGGGAGGGAAGAGGAG
SLC35F2_4	target_1941	CGCTTCATTAAAATAACTGA
SLC35F2_5	target_627	GTACAAATCAGCCAGAGGGA
SLC35F2_6	target_800	TGAGCCGGGACTCTCCTAAC
SLC35F3_1	target_2050	GGCGAGCGCGCGGGCCGGCC
SLC35F3_2	target_1637	ACGGTGACGGGCGTGGGGCG
SLC35F3_3	target_1274	CATCGTGCCGCACGCCGCGG
SLC35F3_4	target_867	CCGCCGCCCTAGCACACCGC
SLC35F3_5	target_1206	CCTCGGCTGCCGGGTCGTTG
SLC35F3_6	target_1176	CGCTCGGGTACAGACCGCGC
SLC35F4_1	target_72	GGCGGCGGCGGCGGCGGCGG
SLC35F4_2	target_1458	CAGCTCCTGCTCCCGCGCCC
SLC35F4_3	target_940	CGGGGCCCGGGAGCTGGTGC
SLC35F4_4	target_1956	GGAGCGGCCCCCACTCGGGC
SLC35F4_5	target_1683	CGGGCGGTGGAGTCAGAGCC
SLC35F4_6	target_1312	TGCCAGGCTGACGGAGAGGC
SLC35F5_1	target_196	GAAGAAGAGGAAAGCGAGCG
SLC35F5_2	target_1934	GGGTGTCTGGGGCAGAGCAA
SLC35F5_3	target_891	GGAAGAAGGGAAGTAGGGCG
SLC35F5_4	target_1763	GGCGAAAGAAGAGAGAAGAT
SLC35F5_5	target_234	TTTCGTTCTAAGGCGGGCGG
SLC35F5_6	target_2985	TCGCAGTTTGTGAAACGGAA
SLC35F6_1	target_1839	AGGAGGGGTCACGTGACGCC
SLC35F6_2	target_2289	AGGCGCGCTCCCCGGGGGCG
SLC35F6_3	target_726	TCGGCAGAGCGCGGGCACCG
SLC35F6_4	target_2125	CTCACTCTCCCCCGCCTTTT
SLC35F6_5	target_435	AAAAAAAAACTGGAAGGCCT
SLC35F6_6	target_1223	GCCGTGATTTGCCAGGGCCA
SLC35G1_1	target_2022	GGGGAGACCCGCTGCCTCCC
SLC35G1_2	target_2109	CCTTGGGGGAGGGTGCGGGT
SLC35G1_3	target_608	AGGCCAGCGGAGGACGCGCG
SLC35G1_4	target_1210	GGCCGGGCGCGCATGCGCAT
SLC35G1_5	target_2168	GTGGGCACCACAGCCCGACC
SLC35G1_6	target_1033	TCCAACCCTCTGCTGCGTTC
SLC35G2_1	target_2304	GCCTCCGTGCCCACTTGCAG
SLC35G2_2	target_2283	CAGGGTTGTGCCTGAACTGA
SLC35G2_3	target_2589	TCCACGGGAAAGCGCCCGCC
SLC35G2_4	target_1338	GGCGTAAGCTAGAGGGGCCC
SLC35G2_5	target_1280	ACTACGTAGCCCTGGCAGAC
SLC35G2_6	target_1599	TTCAAACAAGCGCCCTCCAA
SLC35G3_1	target_165	GCAGATAAACAAGTGAACAA
SLC35G3_2	target_5	GGGGGATTTGGCAGGGTCAT
SLC35G3_3	target_50	TTCTTGGGTGTTTCTCGCAG
SLC35G3_4	target_1525	TCTTCCCTGGAACTCTCCTG
SLC35G3_5	target_2481	GTTGGACTCAGTGGGAAAAT
SLC35G4_1	target_1068	GATCATTCTTGGGTGTTTCT
SLC35G4_3	target_17	GTTGGACTCAGCGGGAAAAT
SLC35G4_4	target_1861	TCTTCCCTGGAACTATCCTG
SLC35G4_5	target_1238	ACTGTGACCTCATTGGAGTT
SLC35G5_3	target_1775	TCTCTGGTTTTCCTAGGCAG
SLC35G6_1	target_1177	GCCTCAGCCTCCCAAGTAGC
SLC35G6_2	target_2582	CACACCATTGCACTCCAGCC
SLC35G6_3	target_518	CGCTTGAATCTGGGAGGTGG
SLC35G6_5	target_1892	AGTTTCCACTCTTGTTATCC
SLC36A1_1	target_1261	GGTGCTGTGGAGCAGAGCTC
SLC36A1_2	target_613	GGGCGCTGGGGACTGCGAAT
SLC36A1_3	target_1291	GATCCCACCGCCCACGCCAG
SLC36A1_4	target_2681	GCTCAGTGAGAAAAAAGGCG
SLC36A1_5	target_1023	GAACATAGTCCTTCCAGCAG
SLC36A1_6	target_2101	GGCAGTAATAGGTCGCCAGG
SLC36A2_1	target_2574	CGAGGCCCCGCCCACCTCCC
SLC36A2_2	target_1616	CTGGGAAGAGGAGGAGAGGA
SLC36A2_3	target_2625	CCTCGTCCACTGGCTTCTCC
SLC36A2_4	target_1557	GGCAGGAAGAGGTGCCCTCC
SLC36A2_5	target_2257	AAGGCATCACCCATTCGTAT
SLC36A3_1	target_2933	GAGCAGGTGGCATTTGAACT
SLC36A3_2	target_2599	CAGCTACCATGTTCCCTGTT
SLC36A3_3	target_2833	TTGGGCCACATCTGCATCCC
SLC36A3_4	target_1901	GGGGTGAAGAGTGGCTTGTA
SLC36A3_5	target_2575	TCTGCTGCAGCTCATTGGCT
SLC36A3_6	target_2610	AAACCAGAGCTACCTCACAA
SLC36A4_1	target_2358	CGGCCCCTCCCGCCCCTCGC
SLC36A4_2	target_2458	CCCGGCTCGGCGGGCACCGC
SLC36A4_3	target_2914	GCGGCGAGGAGCATGCGCAG
SLC36A4_4	target_2656	CCCGAGGACTGCTGCGAGGC
SLC36A4_5	target_1874	CCCCAGGGAGCTATGGGCCC
SLC36A4_6	target_740	TGGGTAACCTGAGATCAGCG
SLC36A4_7	target_1337	GTGTTTGCGCGCGCGCGTGT
SLC36A4_8	target_522	TGTGTGTGTTGAGTGGGGCG
SLC36A4_9	target_924	CGTCTTTGACGTGTACCCAC
SLC36A4_10	target_253	AGAGCCTGCGCCGTGACTCA
SLC36A4_11	target_2468	TCAGATAACCGGTTCCTTTG
SLC36A4_12	target_892	AACTTGGTCAGACGAAGCCC
SLC37A1_1	target_2254	TGATGGGAGACCCCTGCCAG
SLC37A1_2	target_1086	GGTTATGGGAAGGGCCTCTG
SLC37A1_3	target_521	TTTCCTCTCATTTTCCAGTA
SLC37A1_4	target_575	AAGATGAGGACATCATCAGG
SLC37A1_5	target_1084	GGATGATGGGAAAGCTCCGC
SLC37A1_6	target_679	GGGATAATGGGAATGCCTCG
SLC37A2_1	target_1492	GGCAGGCAGGCACGTCACAC
SLC37A2_2	target_1153	AGAAAGTGCAGGGCGGAATG
SLC37A2_3	target_2769	CCCGACAGCTCTGAGGTGCT
SLC37A2_4	target_2826	CGGTTCCCCAGCGGGTGGTG
SLC37A2_5	target_1974	GTCTCGTGTCCCGCCCGTGT
SLC37A2_6	target_2377	GCAGCAATCTCGACGCTGTC
SLC37A3_1	target_1250	GGCGCGGAGGAGGGCGAGGA
SLC37A3_2	target_643	CGCCACGCGGCCTCACCTGC
SLC37A3_3	target_1375	CCCACAGAACTCTGCTGCTG
SLC37A3_4	target_301	GGTAGAGAGAAGAAATGATA
SLC37A3_5	target_713	TGCAGCTAACATTACTGGCC
SLC37A4_1	target_607	GGGGTGGAGGAGGTCCCGGA
SLC37A4_2	target_510	AGGTAAAGGCAGAAATCCTG
SLC37A4_3	target_2006	AGGGTGCTGGCCTGGCTCAC
SLC37A4_4	target_1257	ATTACTGAGCGCCAAACTGT
SLC37A4_5	target_296	CAGGCAAGCAGACATGATAG
SLC37A4_6	target_1045	TCAGGCAGACAAAAGTAATT
SLC37A4_7	target_1111	GGCGAAGACCACGCCCCCGC
SLC37A4_8	target_2745	CCGCTGGTCACGCTGCTCCT
SLC37A4_9	target_308	GAGTTCCCCGCCCCACATGC
SLC37A4_10	target_2235	TGGCCGGCAAGCGAAGCAGC
SLC37A4_11	target_2117	GAACGAGCATAGCGCCCCTT
SLC37A4_12	target_2780	AGGGAGTAAGTCGACGTCCC
SLC38A1_1	target_57	GGCGCTGCCCGCGGCTCTCC
SLC38A1_2	target_148	CCCCGCCGCCCCTGCCACTT
SLC38A1_3	target_61	GGTCCCCTTCCCGCCAACCC
SLC38A1_4	target_154	CCCTGGGCACAGCCTGCAGA
SLC38A1_5	target_40	GCGCAGCATGAGGATGGCCG
SLC38A1_6	target_99	TGGCAGGTCCGAGCGCAGCC
SLC38A1_7	target_1978	TACCCTCACACCGCCCCTCC
SLC38A1_8	target_188	AGTCTATTTCCCCCTGAGAA
SLC38A1_9	target_203	GCTGATCCCTTTTCATCATT
SLC38A1_10	target_1487	ACAGGATCATGTGATGGGGG
SLC38A1_11	target_1432	AATGTAGGCATATACATTTC
SLC38A1_12	target_2760	TTGAAATAGAGTGACTCACC
SLC38A1_19	target_1805	CGGGGGGTGCTGCGTGCGGC
SLC38A1_20	target_1390	GTCCGCGGCCGCTACCCAGC
SLC38A1_21	target_628	GGAGAGCGCAGCTGACCCGA
SLC38A1_22	target_769	AGGAACCACGCACGTCTGGA
SLC38A1_23	target_1604	ACACAGGAAATTTTCACCAA
SLC38A1_24	target_1581	TCTGGGAGTGTTTGAATCCC
SLC38A10_1	target_2087	CCGGAGGGGCGGGCGGAAAC
SLC38A10_2	target_511	GGTCCAGCCGACCTGTGCCC
SLC38A10_3	target_2045	GGACGCGAGCCAATGAGAGG
SLC38A10_4	target_1532	GGCCAGGGGGTAGGGTTTGG
SLC38A10_5	target_255	GACAAGGGACTCGCCCCGCG
SLC38A10_6	target_2843	CGAGACCCTCAGGTGCCCAC
SLC38A11_1	target_887	GGCGGGGGTGTGAAGGGGGG
SLC38A11_2	target_479	TCGGGGCAGGGCAGCGTGGG
SLC38A11_3	target_879	GGCGGGGAGACAGGGCTGCC
SLC38A11_4	target_1319	CTCTCCCTGTTCTCTCAGGG
SLC38A11_5	target_1209	ACTCTTCCCTGGAGCTGCAG
SLC38A11_6	target_1496	AGTTAGCTTCTCCTTTGCTG
SLC38A2_1	target_1590	CGGGGCTGGGCCGCGGGCGC
SLC38A2_2	target_447	GGTCGGAGGCGGGGCCCAGG
SLC38A2_3	target_997	CCGCAGAGGGAGGGGCAGGG
SLC38A2_4	target_1384	GGCGGGGCCTAGGTCTGGGC
SLC38A2_5	target_1154	AGAGTCTTGGGGGCGCCTGC
SLC38A2_6	target_265	AGAGTGGGCTTGGGCTTTGC
SLC38A3_1	target_1942	AGGGCGCCCGGCCCCGCCCC
SLC38A3_2	target_2775	TGGCGGGCGGGGGGCGGGCC
SLC38A3_3	target_987	CCCTGGCGGCCCGCGGGAGG
SLC38A3_4	target_499	GGGGCTGGTCGGGGGAATGG
SLC38A3_5	target_390	CCGGGGCAGGCCGGGAGCAA
SLC38A3_6	target_2347	TGGGAGAGCAGAGCTGCCAG
SLC38A4_1	target_2397	GCATCTAGGGGCGTGGCTGG
SLC38A4_2	target_416	AATAACACTGGGTACACTCG
SLC38A4_3	target_1561	CGCCCAGGACGTGCGGTCAC
SLC38A4_4	target_246	ACTTTGGCTTACGGCGGGAT
SLC38A4_5	target_2476	TGCAATGTTGGTACTCCTGC
SLC38A4_6	target_1362	AAAAGACGCAATTTACCAAC
SLC38A5_1	target_2055	CCGTCTGTTCACTCCCCTCC
SLC38A5_2	target_1663	CCTGGACCCCACCCCAAGCG
SLC38A5_3	target_1061	GTCTGTCCGTCTGTCTTCTA
SLC38A5_4	target_897	TAGTGGGACTTCTCAGGGCT
SLC38A5_5	target_2138	AACTCACACTGTCCGCAAAC
SLC38A5_6	target_1465	AGGCATGCCTGTCATATGCC
SLC38A6_1	target_2356	GGTGAGGTGGCGGCCGCGTT
SLC38A6_2	target_1985	GATCCAGCTGCAGAGCGACG
SLC38A6_3	target_1712	TGGGTCGCGGGTGGATGGGC
SLC38A6_4	target_1359	CCGATCGGTACCGGAGCGGG
SLC38A6_5	target_2999	GGGGAATTGGAATGGTGCTT
SLC38A6_6	target_2596	ATCACTGTTCGCCGCGAAGA
SLC38A7_1	target_560	GGGCTGAGGATTCAGGGAGC
SLC38A7_2	target_2505	GACGCCCGCTCGGGCGGCCG
SLC38A7_3	target_410	CTGGCTCAGGGCAGTGCTGT
SLC38A7_4	target_2423	CAGTGTTTGATTTGGTCAAG
SLC38A7_5	target_1055	ACACGAGCTGGCTGGACGCG
SLC38A7_6	target_1004	TATCCTCTTACTTTTAGTCT
SLC38A8_1	target_2368	GCCGCTCCTGCCCGCTTCCT
SLC38A8_2	target_363	GGCTAGAGGCGGCAGAGGGG
SLC38A8_3	target_615	CGTCAGCTCCCCCTTTCCAA
SLC38A8_4	target_2661	GAAGGGGGACTAGAAGTCGT
SLC38A8_5	target_551	AGGGAGCTCTCACTGAGTTG
SLC38A8_6	target_2616	AGGATATCGAGAACTTAGGG
SLC38A9_1	target_2312	ACTCCCAGAGGGCTCTGCGA
SLC38A9_2	target_2545	GCTGGGCAGCCGGCGCGCCC
SLC38A9_3	target_1815	TCGCAGGGGCCGGCGGGAGT
SLC38A9_4	target_2956	GGGCCCAGCCCCGAGGCTTC
SLC38A9_5	target_1772	GCCAGCACGCCCATCACCGC
SLC38A9_6	target_1806	TCCGACTGGACTCGCCCACC
SLC38A9_7	target_1018	GGAAACTGAGTGCTTTAGGC
SLC38A9_8	target_2485	AAGATGGTTGCCCCCTCAGA
SLC38A9_9	target_2360	ATGGTGTGGCAGATACTGTT
SLC38A9_10	target_656	TGAAGTTTTGGGTAGTAAAT
SLC38A9_11	target_681	TAAGGATTCTGTTGACATTA
SLC38A9_12	target_1398	TAGGGTTGCTGATTAATTGT
SLC39A1_1	target_611	AGAGCGCCACGCGGTGGGCG
SLC39A1_2	target_2732	GGCAGGGTTGTAAACAAAGG
SLC39A1_3	target_602	GGGGCAGGACATCGAGCCAA
SLC39A1_4	target_436	TCCAATCAGGACTCAGCTTT
SLC39A1_5	target_1495	AAGGCCGCCTCTTCCGTAAC
SLC39A1_6	target_2556	GCTGAAGACTTAGGTTTCGG
SLC39A1_7	target_157	GGAGCGGGAGCGGGCGGAGC
SLC39A1_8	target_125	TGCTCTCGCTCACTCTCCTC
SLC39A1_9	target_45	GGAGGACTGAGGGGCCGGAG
SLC39A1_10	target_95	GGGGCCCTGGGGCGCATCTG
SLC39A1_11	target_66	GGATATTAGGAAAAGGACCT
SLC39A1_12	target_136	AGTTAGGAGCAATCAGAGAT
SLC39A1_13	target_1917	GGGGAGCTATGGGAGGGGGC
SLC39A1_14	target_2637	CCGAGTGGGCGGGGACAGAC
SLC39A1_15	target_1958	TCAGAGATCGGGAGCGGGAG
SLC39A1_16	target_1203	ACGCGGCTCCTGTGGGGGAG
SLC39A1_17	target_167	GCGCGCTTCCGGCCTAGAGT
SLC39A1_18	target_565	TGCCATTGGCAGTCGGTCGT
SLC39A1_19	target_1372	GTAAGGCTGGGGGCGGGGTT
SLC39A1_20	target_359	CTACACCTTTTCTTTCTTCC
SLC39A1_21	target_1802	AGGTCCAGGATACGAGATCC
SLC39A1_22	target_1957	GGGCTGAAGGTGAAATATCG
SLC39A1_23	target_2037	GGGAGGTCAACGGGCTATGC
SLC39A1_24	target_1843	AGGGCTGGGCTCTTCAGAAC
SLC39A1_31	target_1352	TCGGCTGCCCAGGCCTCCCC
SLC39A1_32	target_2631	GGGACTCCTGTTCCCGGGCC
SLC39A1_33	target_965	GTGCGGGCTGTCTGGCAGCG
SLC39A1_34	target_1142	TGCGAGGCCGCCAAGCGTCG
SLC39A1_36	target_496	CAGATGAAGAATGCGTGAGC
SLC39A10_1	target_2241	GTTGCCCTAAGAGACTGAAA
SLC39A10_2	target_782	TTTATTTAGTGCTAAGTGCG
SLC39A10_3	target_1377	TTACTTTAACAAAGGGGGCG
SLC39A10_4	target_761	GCTTTTTGGCTAAAGCGTTT
SLC39A10_5	target_903	GGACGGGGTGCGGCTGCGCA
SLC39A10_6	target_824	GACTTGAATTTCCTATTCCT
SLC39A10_7	target_2143	CGCCACCTAGCTATTCACTT
SLC39A10_8	target_1840	CACTACTCACGGATTCCACA
SLC39A10_9	target_1790	ACGCAAACTGCGGAGTTCCG
SLC39A10_10	target_1831	CATAGCGTAGCACCCATAGG
SLC39A11_1	target_1417	GGCGGGGCCCGGAGGCGGGA
SLC39A11_2	target_889	TCACAGCCGTCTGCAGGCTC
SLC39A11_3	target_1575	CTCGCAGACTGCTGGGCTCT
SLC39A11_4	target_358	GCGGGCAGAACAGAGCCCTG
SLC39A11_5	target_347	CGCCTGAAGAATAGATTCTC
SLC39A11_6	target_1053	GTTGCCAGTTGCGGCCAAGG
SLC39A12_1	target_194	AAAAGGGAGAACTTTCTGTC
SLC39A12_2	target_1345	CCTTTCAAGGGACAGAATCT
SLC39A12_3	target_1768	GTAGGTGAGCCTAAGAAAAT
SLC39A12_4	target_2694	TCAAGGTAATCAAATCAGTG
SLC39A12_5	target_2054	TGAAGTCTTTCTATTCTGCG
SLC39A13_1	target_452	GGGCTGCGGGCCGGAGGGGA
SLC39A13_2	target_2414	TGCCGCGGGGTCGGGGGGAG
SLC39A13_3	target_1520	GCTTCCGTCCCTGCCCAGCC
SLC39A13_4	target_269	GGGAGGGCGCTTCCGCCTCG
SLC39A13_5	target_2660	CACACGCACCGCGCTCAGCC
SLC39A13_6	target_2478	GCGGTGGGGGACCCGGGTAG
SLC39A14_1	target_1409	GAGCGGGGCGGGCCGGGGGC
SLC39A14_2	target_2123	CCGGGGCTGCCACGTGGGGC
SLC39A14_3	target_2215	CTGCGCCCTCCTGCGCCTCG
SLC39A14_4	target_2137	TGGCCAGGTCCCCAGCCTGC
SLC39A14_5	target_2083	GCGGGCGCCGACCACAGCCA
SLC39A14_6	target_1425	GGAGGAGCCTGCGGGTCCTC
SLC39A14_7	target_1132	TGGGGCAGTGGGTGGGGGCG
SLC39A14_8	target_1099	GCTGCCCATCCCGCGGCCCT
SLC39A14_9	target_2224	GGTGAGGCTGCGCGGGGCCG
SLC39A14_10	target_780	CCCCGCCCTCACCTGGCGCT
SLC39A14_11	target_2019	CGGTGCCCGGGAGCGGCGCC
SLC39A14_12	target_1094	GCGGAGGAGCCCCGCACCCC
SLC39A2_1	target_2332	AGACGCCACTGGGCTGTGCC
SLC39A2_2	target_1720	AGGAAGGCGTGAACCAGGGG
SLC39A2_3	target_1014	GGGGCCTCCATGCAGGGGGA
SLC39A2_4	target_725	GAAACTCCAGACTCCCTGCC
SLC39A2_5	target_542	CTAAGACTATCCGTAGCTCT
SLC39A2_6	target_1528	GGGTTGGTCTAATCCAAAAT
SLC39A3_1	target_616	TTGGCCTCCCCGAGACCCGC
SLC39A3_2	target_2145	GCGCAGCCACCAAGCGGCCC
SLC39A3_3	target_1875	GGTTTCCTCCCGCTGAGCGG
SLC39A3_4	target_1872	CTCTCCTACCGGCACAGGAA
SLC39A3_5	target_2199	GCCAATCCGGGTTTCCCGCC
SLC39A3_6	target_481	AGGAACGGTTCCGGCAGGGT
SLC39A4_1	target_1253	GCTGGCAGGGCGGAGCTGGC
SLC39A4_2	target_1904	GCCAGGGCTGGGGGACCCGT
SLC39A4_3	target_2976	CGCCCTGGCCAGAGGTGAGC
SLC39A4_4	target_2663	CTGGATCAAGAGGCTCTGGG
SLC39A4_5	target_357	GGCTCAGCAGACCAGCAGGC
SLC39A4_6	target_2080	GGTCCGCCAGCGTATTTAAC
SLC39A4_7	target_1063	GTGGCTCCAGGCTGTTGGGG
SLC39A4_8	target_908	GGACCCGCCCGGGCTGCATG
SLC39A4_9	target_635	GCCTGTGGGGGTCGAGGGCT
SLC39A4_10	target_2292	GGCTGCCTGTCCAGGGGAAG
SLC39A4_11	target_1451	GATTGGCTGCTGGAGATGCC
SLC39A4_12	target_494	TCTGCAGGAATACCTGGGAG
SLC39A4_13	target_583	CACACTCCCAGCCCCACCCC
SLC39A4_14	target_439	GGGAGGCGGAGCCGCAGGCC
SLC39A4_15	target_1647	CGTGGGAAGGGGTCGGTGGG
SLC39A4_16	target_1119	GGCGGGGCCCCAGATCACCG
SLC39A4_17	target_2500	CCGGAAGTGGAGGAGGAACG
SLC39A4_18	target_1944	GGAGCCCTCGTGGGGGGGCT
SLC39A5_1	target_926	GTCACCTGCAGGGAGGGGGT
SLC39A5_2	target_1123	CTTTCTGTGGGAAAAGGAAG
SLC39A5_3	target_2242	GGGTGTCCCTAGAAGGTGGA
SLC39A5_4	target_2127	GGGGCAGGTCTGCTTTGCCT
SLC39A5_5	target_2682	AACTAGGCATTTGGGAAGGT
SLC39A5_6	target_692	GAGTCCAACACAGAGTAGAG
SLC39A5_7	target_221	GGGGTGGGGCCAGTGTGTGA
SLC39A5_8	target_1485	GGTGGCCCCTCCCTACCCAG
SLC39A5_9	target_1896	GATCAAAAGTCAGTCTCTGC
SLC39A5_10	target_1865	GGTTCACTGGTCTCTGGGGT
SLC39A5_11	target_2635	TCTGCCCTGGGAAAGCCACA
SLC39A5_12	target_2966	AGAGGAAAAAGACTAGGCCC
SLC39A6_1	target_398	AGGGCCGCGCCACGCCCCCG
SLC39A6_2	target_2210	CAGCAGCCAGGGCTGGCCCC
SLC39A6_3	target_2818	GGGCATGCGCAGTGCGACCC
SLC39A6_4	target_309	CGTCTGCGGAGCCGGGTTCC
SLC39A6_5	target_1947	GGGGCGCTGGCTAGCGAGTA
SLC39A6_6	target_2901	AGTTGGGGGTCATTTCCTCG
SLC39A7_1	target_2654	GAGGTGATTTGAGGGGAGGG
SLC39A7_2	target_979	ACCGAGGAGGCGGTCTCCTC
SLC39A7_3	target_739	TTTGTACAGACGGGAAGTCT
SLC39A7_4	target_1931	CTGACACGCATGCGCGAGTG
SLC39A7_5	target_760	GGCGAGGCGGGCTAACAGGC
SLC39A7_6	target_1908	TTCCCGCCCCCTCGTCTAGT
SLC39A8_1	target_421	AGAAGATCCGGGGAGAGGGA
SLC39A8_2	target_145	AAACAGATAGGAGAGGTGAG
SLC39A8_3	target_2426	CTGCGTGTCAACGTAAGACT
SLC39A8_4	target_951	AGTTAATCGGAAGCACTCGC
SLC39A8_5	target_810	CTGGGGATTGCGCGTTTAAA
SLC39A8_6	target_2929	GCCCCGGCGTGGACGCGCGC
SLC39A8_7	target_2416	GACCGCCGGCCTTCCCTCCG
SLC39A8_8	target_794	GTGCTACGGAGGCGGGGACA
SLC39A8_9	target_328	AAGAGGGCATGGCTGATGCT
SLC39A8_10	target_944	AACCCTCAGGAGTGAGGGTG
SLC39A8_11	target_1214	GGAGTTCAGGCTGGGGAAAT
SLC39A8_12	target_2713	CACTGCAGCCTCCGCCTTCT
SLC39A8_13	target_2664	GGAGTGTAGTGGCACTATCT
SLC39A8_14	target_1255	GTCTTGGTTTGTCACCAGGC
SLC39A8_15	target_1318	TTGGCTGATGTTTGAACTGT
SLC39A8_16	target_584	CTCACCAGAGTGAGAATTTT
SLC39A8_17	target_325	AAGGGGACCCTCCCTCTCCC
SLC39A8_18	target_1849	GCTGCAGAAAAGGGCTCTTC
SLC39A8_20	target_2395	ACGCGCAATCCCCAGGACTC
SLC39A8_21	target_2549	GCCAAGCTCAGAGAAGATCC
SLC39A8_22	target_730	AGTGAGACGTGCAGTCCCCA
SLC39A9_1	target_790	TTCCGGCGGCTCCTCTCGCG
SLC39A9_2	target_2608	GCTACCCGAGTCCGAGTCCC
SLC39A9_3	target_1930	TGCAACGCAAAAGAGCCTTT
SLC39A9_4	target_786	GATGGTGAGAAAGGCCTCCG
SLC39A9_5	target_310	TTGTAGTTAAGCTCGTGTAA
SLC39A9_6	target_842	CTGCTGTAGCGAAGAGAGTT
SLC39A9_7	target_3001	TGCCTTTGTAAAGGAGGGGG
[truncated: 1,009 more rows]
