# Supplementary material for: Gain-of-function genetic screens in human cells identify SLC transporters overcoming environmental nutrient restrictions
Source: Life Sci Alliance. 2022 Sep 16;5(11):e202201404. doi: 10.26508/lsa.202201404 (PMC9481932; doi:10.26508/lsa.202201404)
Supplement: Supplementary file 7 [file LSA-2022-01404_TableS7.xlsx]

## Sheet: Suppl_Table_7_AAscreen_GSEA_res
GeneName	aLFC	medLFC	pval	padj	ES	NES	nMoreExtreme	size	leadingEdge	totalSize	Screen	log10padj
SLC44A1	0.946678	0.946678	6.96555e-05	0.000487588	0.99798	1.52492	34	2	target_1570; target_377	5	Cys	3.31195
SLC25A5	0.698361	0.698361	0.00194239	0.00679838	0.984646	1.50455	975	2	target_299; target_404	6	Cys	2.16759
SLC25A23	0.742814	0.742814	0.00383304	0.00894376	0.977778	1.49406	1925	2	target_2954; target_215	6	Cys	2.04848
SLC25A25	0.596468	0.596468	0.00518436	0.00907263	0.973737	1.48788	2604	2	target_827; target_2688	13	Cys	2.04227
SLC25A51	0.620762	0.620762	0.0191612	0.0268257	0.945455	1.44467	9627	2	target_2048; target_295	6	Cys	1.57145
SLC1A4	0.431263	0.431263	0.0232092	0.0270774	0.939394	1.4354	11661	2	target_2294; target_2357	11	Cys	1.56739
SLC17A6	0.885212	0.885212	0.0358965	0.0358965	0.923232	1.41071	18036	2	target_1129; target_1824	6	Cys	1.44495
SLC25A15	0.999547	0.999547	0.00031581	0.00221067	0.995556	1.51973	158	2	target_1139; target_1966	6	Full	2.65548
SLC39A4	0.713	0.713	0.00187897	0.00617515	0.986667	1.50616	945	2	target_908; target_1253	12	Full	2.20935
SLCO2B1	0.523034	0.51165	0.00264649	0.00617515	0.9519	1.62465	1342	3	target_2369; target_647; target_1256	12	Full	2.20935
SLC1A2	0.831046	0.831046	0.00355535	0.00622186	0.980202	1.49629	1789	2	target_1587; target_905	12	Full	2.20608
SLC34A1	0.58718	0.58718	0.00831038	0.0116345	0.967677	1.47717	4183	2	target_2180; target_632	6	Full	1.93425
SLC26A6	0.526796	0.526796	0.0178681	0.0208461	0.949899	1.45003	8995	2	target_2497; target_1756	12	Full	1.68097
SLC16A5	0.632622	0.632622	0.0213539	0.0213539	0.944646	1.44202	10750	2	target_745; target_1856	13	Full	1.67052
SLC1A3	1.375	1.43861	3.88878e-05	0.000583317	0.993129	1.67074	19	3	target_1777; target_2932; target_1092	5	Gln	3.2341
SLC1A2	1.29219	1.15957	0.00103442	0.00775812	0.968472	1.62926	531	3	target_1194; target_2406; target_905	12	Gln	2.11024
SLC17A3	0.814674	0.814674	0.00335557	0.0167778	0.981414	1.48417	1698	2	target_1507; target_1125	4	Gln	1.77526
SLC52A1	0.640641	0.640641	0.0331745	0.0622021	0.932929	1.41084	16796	2	target_2968; target_2508	6	Gln	1.20619
SLC10A4	0.601399	0.601399	0.0249051	0.0622021	0.942626	1.42551	12609	2	target_425; target_2607	6	Gln	1.20619
SLC4A9	0.587234	0.587234	0.0190807	0.0622021	0.950303	1.43712	9660	2	target_1133; target_1542	6	Gln	1.20619
SLC1A5	0.579355	0.579355	0.0214349	0.0622021	0.947071	1.43223	10852	2	target_1503; target_1419	14	Gln	1.20619
SLC6A12	0.572129	0.572129	0.0295128	0.0622021	0.93697	1.41696	14942	2	target_2895; target_283	18	Gln	1.20619
SLC2A14	0.617701	0.617701	0.0543566	0.0905943	0.911515	1.37846	27521	2	target_146; target_111	8	Gln	1.0429
SLC39A1	0.446032	0.446032	0.0648065	0.0972097	0.902222	1.36441	32812	2	target_1203; target_167	16	Gln	1.01229
SLC25A45	0.408017	0.408017	0.0804842	0.109751	0.889697	1.34547	40750	2	target_41; target_135	12	Gln	0.959591
SLC38A9	0.431181	0.431181	0.0972265	0.121533	0.877172	1.32652	49227	2	target_1018; target_656	6	Gln	0.915305
SLC4A2	0.438443	0.438443	0.117749	0.135864	0.86303	1.30514	59618	2	target_1051; target_2165	15	Gln	0.866895
SLC43A3	0.411264	0.411264	0.187649	0.201052	0.821414	1.2422	95010	2	target_948; target_7	16	Gln	0.696691
SLC44A4	0.328294	0.328294	0.277382	0.277382	0.776162	1.17377	140444	2	target_834; target_159	12	Gln	0.556921
SLC7A5	1.77969	1.80402	8.21532e-06	0.000115015	0.995958	1.72919	3	3	target_2041; target_2096; target_2281	6	His	3.93925
SLC17A8	0.76022	0.76022	0.00927176	0.0286534	0.963636	1.48588	4579	2	target_793; target_2632	6	His	1.54282
SLC43A3	0.65592	0.65592	0.0102334	0.0286534	0.961616	1.48277	5054	2	target_948; target_2686	16	His	1.54282
SLC30A8	0.623701	0.623701	0.00778585	0.0286534	0.967273	1.49149	3845	2	target_1100; target_2995	16	His	1.54282
SLCO2B1	0.622492	0.622492	0.00644165	0.0286534	0.970909	1.49709	3181	2	target_1256; target_2369	12	His	1.54282
SLC36A4	0.465168	0.465168	0.0318054	0.0742126	0.928081	1.43106	15710	2	target_740; target_924	11	His	1.12952
SLC22A16	0.786074	0.786074	0.0409739	0.0819478	0.917172	1.41423	20239	2	target_929; target_2689	6	His	1.08646
SLC30A9	0.4001	0.4001	0.0499035	0.0873312	0.907475	1.39928	24650	2	target_1138; target_2927	4	His	1.05883
SLC25A30	0.440929	0.440929	0.0642849	0.0999987	0.893737	1.3781	31754	2	target_2059; target_1479	6	His	1.00001
SLC39A8	0.432157	0.432157	0.079146	0.110804	0.880808	1.35816	39095	2	target_794; target_2395	16	His	0.955443
SLC35B2	0.331103	0.331103	0.114067	0.145176	0.854141	1.31704	56345	2	target_130; target_14	18	His	0.838105
SLC16A3	0.326903	0.348762	0.127366	0.148594	0.772433	1.3411	62013	3	target_393; target_2716; target_2955	29	His	0.827999
SLC38A1	0.403973	0.403973	0.163521	0.170049	0.822626	1.26845	80774	2	target_769; target_148	12	His	0.769426
SLC44A4	0.331298	0.315933	0.170049	0.170049	0.744947	1.29338	82795	3	target_81; target_54; target_159	12	His	0.769426
SLC25A15	1.18508	1.18508	9.59937e-05	0.000671956	0.99798	1.51176	48	2	target_1139; target_1966	6	Ile	3.17266
SLC27A1	0.766391	0.766391	0.00961505	0.0335795	0.966465	1.46402	4907	2	target_2144; target_1615	6	Ile	1.47393
SLC7A5	0.655341	0.655341	0.0143912	0.0335795	0.95798	1.45117	7345	2	target_2041; target_2860	6	Ile	1.47393
SLC11A1	0.469863	0.469863	0.0447683	0.0626757	0.919596	1.39302	22851	2	target_2846; target_1749	5	Ile	1.2029
SLC20A1	0.439479	0.439479	0.0380135	0.0626757	0.926869	1.40404	19403	2	target_2794; target_854	6	Ile	1.2029
SLC39A1	0.450264	0.450264	0.0699912	0.0816564	0.896566	1.35814	35726	2	target_1203; target_167	16	Ile	1.08801
SLC43A3	0.406343	0.406343	0.0839122	0.0839122	0.885657	1.34161	42832	2	target_948; target_2686	16	Ile	1.07617
SLC25A15	1.035	1.035	0.00134967	0.00944767	0.988687	1.49838	691	2	target_1139; target_1966	6	Leu	2.02468
SLC7A5	0.826372	0.826372	0.00573999	0.02009	0.973737	1.47573	2942	2	target_2041; target_2096	6	Leu	1.69702
SLC25A25	0.775563	0.775563	0.0213489	0.0373606	0.945455	1.43286	10945	2	target_827; target_2688	13	Leu	1.42759
SLC6A13	0.613196	0.613196	0.0211129	0.0373606	0.945859	1.43347	10824	2	target_555; target_2988	6	Leu	1.42759
SLC39A1	0.574459	0.574459	0.0288404	0.0403765	0.935758	1.41817	14786	2	target_1203; target_167	16	Leu	1.39387
SLC43A3	0.485662	0.485662	0.0622095	0.0725778	0.90101	1.3655	31895	2	target_948; target_2686	16	Leu	1.1392
SLC16A3	0.347386	0.347386	0.1001	0.1001	0.870707	1.31958	51322	2	target_2424; target_2716	29	Leu	0.999567
SLC7A3	2.29325	2.46306	1.9109e-06	2.29308e-05	0.999596	1.6713	0	3	target_2013; target_2936; target_1178	5	Lys	4.63958
SLC1A2	1.0027	1.0027	0.00082306	0.00493836	0.993535	1.49511	419	2	target_905; target_1587	12	Lys	2.30642
SLC25A15	0.892051	0.892051	0.00254561	0.0101824	0.986263	1.48417	1298	2	target_1139; target_1966	6	Lys	1.99215
SLC11A1	0.587353	0.587353	0.0211036	0.0506487	0.950303	1.43005	10768	2	target_2846; target_1749	5	Lys	1.29543
SLC22A12	0.550883	0.550883	0.0207744	0.0506487	0.950707	1.43066	10600	2	target_1423; target_1743	6	Lys	1.29543
SLC12A4	0.57493	0.57493	0.0273079	0.0546159	0.942222	1.41789	13934	2	target_2615; target_2590	18	Lys	1.26268
SLC26A8	0.537498	0.537498	0.0323854	0.0555179	0.936162	1.40877	16525	2	target_1821; target_770	13	Lys	1.25557
SLC27A1	0.580266	0.580266	0.0471633	0.0707449	0.920404	1.38506	24066	2	target_2144; target_1615	6	Lys	1.1503
SLC39A1	0.630849	0.630849	0.0586646	0.0782194	0.909495	1.36864	29935	2	target_1203; target_167	16	Lys	1.10669
SLC23A2	0.441554	0.441554	0.0884946	0.0965396	0.885253	1.33216	45157	2	target_2513; target_429	10	Lys	1.01529
SLC11A2	0.413856	0.413856	0.0811439	0.0965396	0.890909	1.34067	41406	2	target_515; target_9	22	Lys	1.01529
SLC6A16	0.39854	0.39854	0.129234	0.129234	0.857374	1.29021	65946	2	target_1093; target_737	5	Lys	0.888623
SLC6A15	1.97399	1.85026	1.8537e-06	4.63425e-05	0.996359	1.9388	0	5	target_1708; target_257; target_1664; target_2100; target_445	6	NoAA	4.33402
SLC6A14	2.8632	3.22536	7.78553e-05	0.000973192	0.957524	1.86323	41	5	target_930; target_2004; target_2084; target_2779; target_558	6	NoAA	3.0118
SLC25A23	0.811198	0.819937	0.0080326	0.0385735	0.935327	1.57298	4202	3	target_1160; target_2954; target_215	6	NoAA	1.41371
SLC25A5	0.753663	0.753663	0.00872394	0.0385735	0.971313	1.46792	4461	2	target_299; target_629	6	NoAA	1.41371
SLCO2B1	0.617781	0.583096	0.00812701	0.0385735	0.898504	1.64059	4324	4	target_2369; target_1256; target_242; target_1783	12	NoAA	1.41371
SLC12A6	0.555705	0.555407	0.00925765	0.0385735	0.931285	1.56618	4843	3	target_2798; target_73; target_2379	23	NoAA	1.41371
SLC38A2	0.928628	0.928628	0.0112578	0.0399929	0.966465	1.46059	5757	2	target_1154; target_265	5	NoAA	1.39802
SLC25A36	0.677694	0.677694	0.020148	0.0399929	0.951515	1.438	10304	2	target_847; target_1412	6	NoAA	1.39802
SLC4A11	0.669665	0.669665	0.0239957	0.0399929	0.946263	1.43006	12272	2	target_466; target_1937	17	NoAA	1.39802
SLC39A4	0.669347	0.669347	0.0151408	0.0399929	0.959596	1.45021	7743	2	target_908; target_1253	12	NoAA	1.39802
SLC4A4	0.663475	0.663475	0.016525	0.0399929	0.957172	1.44655	8451	2	target_1059; target_593	12	NoAA	1.39802
SLC34A1	0.660057	0.660057	0.019145	0.0399929	0.953131	1.44044	9791	2	target_2180; target_632	6	NoAA	1.39802
SLC23A2	0.638371	0.638371	0.0172993	0.0399929	0.95596	1.44472	8847	2	target_429; target_2513	10	NoAA	1.39802
SLC4A2	0.593312	0.593312	0.022721	0.0399929	0.947879	1.43251	11620	2	target_2165; target_1022	15	NoAA	1.39802
SLC11A1	0.528103	0.551533	0.0218522	0.0399929	0.901374	1.51588	11433	3	target_2757; target_2846; target_1749	5	NoAA	1.39802
SLC2A12	0.627787	0.627787	0.0300059	0.0468842	0.938586	1.41846	15346	2	target_990; target_1611	6	NoAA	1.32897
SLC27A1	0.572468	0.572468	0.0396722	0.0583415	0.927273	1.40136	20290	2	target_2144; target_1615	6	NoAA	1.23402
SLC25A12	0.616259	0.616259	0.0532939	0.0734396	0.913131	1.37999	27257	2	target_706; target_2250	6	NoAA	1.13407
SLC25A25	0.481618	0.481618	0.0558141	0.0734396	0.910707	1.37633	28546	2	target_827; target_2688	13	NoAA	1.13407
SLC35D2	0.536824	0.536824	0.0619513	0.0774392	0.905051	1.36778	31685	2	target_2192; target_1195	6	NoAA	1.11104
SLC16A1	0.657615	0.657615	0.0669135	0.079659	0.900606	1.36106	34223	2	target_2564; target_1888	10	NoAA	1.09877
SLC19A1	0.712905	0.712905	0.100824	0.114573	0.873535	1.32015	51567	2	target_732; target_2711	9	NoAA	0.940919
SLC29A1	0.656258	0.656258	0.110363	0.11996	0.866667	1.30977	56446	2	target_2766; target_1661	14	NoAA	0.920964
SLC11A2	0.473238	0.473238	0.14529	0.151344	0.843636	1.27497	74310	2	target_515; target_12	22	NoAA	0.820035
SLC2A8	0.495869	0.495869	0.158024	0.158024	0.83596	1.26337	80823	2	target_218; target_1609	6	NoAA	0.801276
SLC25A15	0.900531	0.900531	0.00069332	0.00762652	0.991919	1.50847	350	2	target_1139; target_1966	6	Phe	2.11767
SLC7A5	0.881899	0.92598	0.00153822	0.00846019	0.960792	1.63093	789	3	target_2041; target_2096; target_2860	6	Phe	2.07262
SLC27A1	0.717185	0.717185	0.00868526	0.0238845	0.966465	1.46976	4396	2	target_2144; target_1615	6	Phe	1.62188
SLC25A25	0.64761	0.64761	0.00669814	0.0238845	0.970909	1.47652	3390	2	target_2688; target_827	13	Phe	1.62188
SLC25A22	2.6525	2.6525	0.0224233	0.0361088	0.943434	1.43473	11351	2	target_1817; target_1883	17	Phe	1.44239
SLC1A2	0.75116	0.75116	0.0227057	0.0361088	0.94303	1.43412	11494	2	target_1587; target_905	12	Phe	1.44239
SLC39A1	0.610532	0.610532	0.0229783	0.0361088	0.942626	1.4335	11632	2	target_1203; target_167	16	Phe	1.44239
SLC16A5	0.548104	0.548104	0.031948	0.0439285	0.931313	1.4163	16173	2	target_735; target_2148	13	Phe	1.35725
SLC3A2	0.734126	0.734126	0.0397385	0.0485692	0.922828	1.4034	20117	2	target_495; target_1630	11	Phe	1.31364
SLC11A2	0.467625	0.467625	0.0544918	0.0599409	0.907879	1.38066	27586	2	target_515; target_9	22	Phe	1.22228
SLC7A3	0.441087	0.441087	0.246597	0.246597	0.786667	1.19633	124841	2	target_2013; target_2800	5	Phe	0.608013
SLC25A15	1.25796	1.25796	0.000197622	0.00114127	0.996364	1.51706	99	2	target_1139; target_1966	6	T0	2.94261
SLC35E1	1.02216	1.02216	0.000326076	0.00114127	0.995152	1.51522	164	2	target_1593; target_502	6	T0	2.94261
SLCO2B1	0.548856	0.514264	0.00640937	0.0149552	0.893247	1.65353	3328	4	target_2369; target_1256; target_647; target_1783	12	T0	1.82521
SLC7A14	1.05652	1.05652	0.01745	0.0305375	0.951111	1.44816	8829	2	target_2517; target_2974	6	T0	1.51517
SLC39A10	0.790785	0.790785	0.0475537	0.0665752	0.914747	1.39279	24062	2	target_1377; target_1790	10	T0	1.17669
SLC6A2	0.46991	0.46991	0.133266	0.150924	0.848081	1.29129	67434	2	target_448; target_1589	20	T0	0.821242
SLC22A6	0.334501	0.334501	0.150924	0.150924	0.837172	1.27468	76369	2	target_200; target_2349	6	T0	0.821242
SLC35E1	0.88624	0.88624	0.00070436	0.00493052	0.992323	1.50725	356	2	target_1593; target_502	6	Thr	2.30711
SLC39A1	0.644274	0.644274	0.00381972	0.0111823	0.978586	1.48639	1935	2	target_1203; target_167	16	Thr	1.95147
SLC26A8	0.635793	0.635793	0.00479241	0.0111823	0.975758	1.48209	2428	2	target_1821; target_770	13	Thr	1.95147
SLC25A15	0.759671	0.759671	0.0110251	0.0192939	0.961616	1.46061	5587	2	target_1139; target_1966	6	Thr	1.71458
SLC39A10	0.680993	0.680993	0.0208427	0.0291798	0.945051	1.43545	10563	2	target_1377; target_1790	10	Thr	1.53492
SLC1A5	0.880439	0.880439	0.0436171	0.0508866	0.917172	1.3931	22106	2	target_1503; target_1419	14	Thr	1.2934
SLC38A8	0.515871	0.515871	0.137626	0.137626	0.845253	1.28386	69754	2	target_363; target_615	6	Thr	0.861298
SLC1A2	1.03387	1.03387	0.000796032	0.00824377	0.991515	1.51337	402	2	target_1587; target_905	12	Trp	2.08387
SLC25A15	0.949141	0.949141	0.000969855	0.00824377	0.990707	1.51213	490	2	target_1139; target_1966	6	Trp	2.08387
SLC35E1	0.878652	0.878652	0.0018844	0.0106783	0.985859	1.50473	953	2	target_1593; target_502	6	Trp	1.9715
SLC7A5	0.847956	0.847956	0.0041046	0.0147213	0.978182	1.49302	2077	2	target_2041; target_2096	6	Trp	1.83206
SLC39A4	0.699053	0.699053	0.00432978	0.0147213	0.977374	1.49178	2191	2	target_1253; target_635	12	Trp	1.83206
SLC25A25	0.6603	0.6603	0.00899338	0.0254813	0.965657	1.4739	4552	2	target_827; target_2688	13	Trp	1.59378
SLC6A9	0.569623	0.569623	0.0111899	0.0271754	0.960808	1.4665	5664	2	target_2770; target_171	11	Trp	1.56582
SLC25A5	0.711098	0.711098	0.0237387	0.0504448	0.94101	1.43628	12017	2	target_299; target_404	6	Trp	1.29718
SLC2A4	0.571596	0.571596	0.0414253	0.070423	0.919596	1.40359	20971	2	target_2173; target_1340	5	Trp	1.15229
SLC39A1	0.493481	0.493481	0.0403725	0.070423	0.920808	1.40544	20438	2	target_167; target_1203	16	Trp	1.15229
SLC43A3	0.437621	0.373602	0.0494576	0.0764345	0.847615	1.44591	25352	3	target_948; target_2686; target_7	16	Trp	1.11671
SLC11A2	0.375781	0.375781	0.0640421	0.0907263	0.897778	1.37029	32421	2	target_9; target_1110	22	Trp	1.04227
SLC12A8	0.739664	0.739664	0.0732468	0.0957843	0.890101	1.35858	37081	2	target_2690; target_2417	12	Trp	1.01871
SLC6A2	0.544388	0.544388	0.0848752	0.103063	0.880808	1.34439	42968	2	target_448; target_1589	20	Trp	0.986898
SLC2A11	0.331583	0.331583	0.0942636	0.106832	0.873535	1.33329	47721	2	target_1381; target_2035	15	Trp	0.971298
SLC16A14	0.352086	0.352086	0.117562	0.12491	0.857374	1.30862	59516	2	target_2546; target_1193	6	Trp	0.903405
SLC16A3	0.421837	0.421837	0.198234	0.198234	0.809697	1.23585	100357	2	target_597; target_2424	29	Trp	0.702822
SLC7A5	1.10355	0.876146	0.000179102	0.00143282	0.965629	1.76335	95	4	target_2041; target_2096; target_2860; target_2281	6	Tyr	2.84381
SLC25A15	0.984244	0.984244	0.00596616	0.0225475	0.974545	1.47461	3055	2	target_1139; target_1966	6	Tyr	1.6469
SLC25A25	0.68749	0.68749	0.00845532	0.0225475	0.968889	1.46605	4330	2	target_827; target_2688	13	Tyr	1.6469
SLC25A22	2.61094	2.61094	0.0182753	0.0365506	0.951515	1.43976	9360	2	target_1817; target_1883	17	Tyr	1.43711
SLC25A5	0.702041	0.702041	0.034895	0.055832	0.930101	1.40736	17873	2	target_299; target_404	6	Tyr	1.25312
SLC38A8	0.495273	0.495273	0.215321	0.232188	0.806465	1.22028	110291	2	target_363; target_615	6	Tyr	0.63416
SLC6A16	0.421396	0.421396	0.182956	0.232188	0.823434	1.24596	93713	2	target_1093; target_737	5	Tyr	0.63416
SLC44A4	0.322752	0.322752	0.232188	0.232188	0.79798	1.20744	118931	2	target_81; target_159	12	Tyr	0.63416
SLC35E1	0.97585	0.97585	0.00734533	0.0394407	0.970101	1.47007	3767	2	target_1593; target_502	6	Val	1.40406
SLC6A15	0.876402	0.876402	0.00346408	0.0394407	0.980202	1.48537	1776	2	target_1664; target_2100	6	Val	1.40406
SLC7A8	1.54471	0.669428	0.00788814	0.0394407	0.928052	1.56735	4142	3	target_464; target_287; target_2920	17	Val	1.40406
SLC25A25	0.624008	0.624008	0.0260595	0.06329	0.93899	1.42292	13367	2	target_827; target_2688	13	Val	1.19867
SLC22A12	0.598425	0.598425	0.0252311	0.06329	0.940202	1.42476	12942	2	target_1743; target_1423	6	Val	1.19867
SLC16A5	0.766294	0.597235	0.0208789	0.06329	0.894099	1.51001	10965	3	target_745; target_2148; target_1856	13	Val	1.19867
SLC6A2	0.563757	0.563757	0.0295353	0.06329	0.934545	1.41619	15150	2	target_448; target_1271	20	Val	1.19867
SLC41A3	0.605825	0.605825	0.047347	0.087154	0.914747	1.38619	24287	2	target_284; target_1577	15	Val	1.05971
SLC39A1	0.561893	0.561893	0.0639129	0.087154	0.899394	1.36292	32785	2	target_1203; target_167	16	Val	1.05971
SLC27A1	0.607816	0.521071	0.0559976	0.087154	0.842765	1.42331	29410	3	target_2144; target_1615; target_807	6	Val	1.05971
SLC38A9	0.48692	0.48692	0.0597627	0.087154	0.90303	1.36843	30656	2	target_656; target_2360	6	Val	1.05971
SLC22A18	0.421539	0.421539	0.0966609	0.120826	0.873131	1.32312	49584	2	target_2421; target_1963	12	Val	0.917839
SLC22A23	0.440077	0.440077	0.107815	0.124402	0.865455	1.31149	55306	2	target_1778; target_2140	12	Val	0.905172
MTCH1	0.462945	0.462945	0.12891	0.130196	0.851313	1.29006	66127	2	target_1121; target_2388	6	Val	0.885401
SLC43A3	0.369137	0.369137	0.130196	0.130196	0.850505	1.28884	66787	2	target_2686; target_948	16	Val	0.885401
SLC7A3	4.34492	5.17583	5.18541e-05	0.000414833	0.984517	1.79966	26	4	target_2013; target_2936; target_1178; target_2800	5	Arg	3.38213
SLC25A15	0.964985	0.84491	0.00109455	0.0043782	0.976556	1.64371	562	3	target_1139; target_1966; target_424	6	Arg	2.3587
SLC35E1	0.8264	0.8264	0.00277205	0.00739213	0.985859	1.49033	1406	2	target_1593; target_502	6	Arg	2.13123
SLCO2B1	0.599268	0.599268	0.0135864	0.0271728	0.96202	1.45429	6895	2	target_2369; target_1256	12	Arg	1.56587
SLC39A10	0.523112	0.523112	0.0471997	0.0650187	0.919596	1.39016	23956	2	target_1377; target_1790	10	Arg	1.18696
SLC17A3	0.504063	0.504063	0.048764	0.0650187	0.91798	1.38771	24750	2	target_1507; target_1125	4	Arg	1.18696
SLC43A3	0.418858	0.418858	0.0626105	0.0715548	0.904646	1.36756	31778	2	target_948; target_2686	16	Arg	1.14536
SLC13A2	0.303066	0.303066	0.148944	0.148944	0.842424	1.2735	75598	2	target_2407; target_229	5	Arg	0.826977
SLC7A5	3.37582	3.36617	2.73955e-05	0.00731459	0.970481	1.81469	14	4	target_2041; target_2096; target_2281; target_2860	6	Met	2.13581
SLC12A8	1.83431	1.74811	0.000649167	0.0866638	0.862404	1.84616	360	6	target_2690; target_2456; target_2394; target_1159; target_2642; target_461	12	Met	1.06216
SLC12A6	1.88125	1.97251	0.00117426	0.104509	0.788929	1.85406	657	8	target_2765; target_60; target_1830; target_763; target_73; target_1386	23	Met	0.980845
SLC6A12	1.55629	1.47081	0.00265474	0.177204	0.719876	1.81538	1496	10	target_2386; target_1688; target_1097; target_2895; target_2774; target_1001; target_946; target_836; target_792; target_2521	18	Met	0.751527
SLC16A2	3.07419	3.07419	0.0049099	0.253239	0.970101	1.47768	2620	2	target_2116; target_1020	6	Met	0.59647
SLC7A8	2.17777	1.68057	0.00569076	0.253239	0.693691	1.74935	3208	10	target_464; target_287; target_205; target_2920; target_516; target_379; target_33; target_372; target_68	17	Met	0.59647
SLC34A1	2.08202	1.95045	0.00719613	0.258865	0.911479	1.55484	3899	3	target_1629; target_341; target_2544	6	Met	0.586926
SLC43A2	1.97432	1.74742	0.00775627	0.258865	0.754023	1.69825	4334	7	target_2310; target_1699; target_1449; target_2881; target_541; target_181; target_503	16	Met	0.586926
SLC25A35	2.02391	2.65126	0.0154569	0.282622	0.884575	1.50894	8376	3	target_1480; target_744; target_2091	6	Met	0.548795
SLC2A1	2.2213	2.25545	0.0158776	0.282622	0.883589	1.50726	8604	3	target_2705; target_2451; target_2605	6	Met	0.548795
SLC16A1	1.85222	2.07277	0.0145452	0.282622	0.835069	1.56148	7963	4	target_2564; target_1888; target_861	10	Met	0.548795
SLC6A1	2.00545	2.03555	0.0128368	0.282622	0.891673	1.52105	6956	3	target_774; target_2507; target_1148	6	Met	0.548795
SLC1A2	1.82785	1.54515	0.0129977	0.282622	0.76204	1.63131	7227	6	target_1700; target_505; target_1194; target_1076; target_2486; target_1078	12	Met	0.548795
SLC12A4	1.40063	1.27088	0.00973138	0.282622	0.716889	1.68476	5452	8	target_4; target_29; target_312; target_26; target_1277; target_1740; target_2504; target_1738	18	Met	0.548795
SLC25A22	1.78466	1.19972	0.0129898	0.282622	0.682185	1.6648	7303	9	target_1817; target_240; target_454; target_2777; target_2389; target_2759; target_362; target_1883	17	Met	0.548795
SLC25A17	2.24507	2.24507	0.0282905	0.288241	0.924848	1.40875	15101	2	target_2723; target_1729	6	Met	0.540244
SLC12A5	2.15775	2.15775	0.0213312	0.288241	0.935354	1.42475	11386	2	target_2805; target_1536	11	Met	0.540244
SLC6A6	2.06633	2.15085	0.0207175	0.288241	0.872676	1.48865	11227	3	target_2578; target_2604; target_2465	6	Met	0.540244
SLC25A47	2.13639	2.13639	0.0246432	0.288241	0.930101	1.41675	13154	2	target_816; target_2815	6	Met	0.540244
UCP1	1.81926	2.07522	0.0272859	0.288241	0.805253	1.50573	14939	4	target_1726; target_1000; target_1131; target_890	6	Met	0.540244
SLC32A1	2.18963	2.04929	0.029148	0.288241	0.856508	1.46106	15796	3	target_1350; target_2495; target_2016	5	Met	0.540244
SLC4A9	2.07397	1.92971	0.0280225	0.288241	0.858529	1.46451	15186	3	target_333; target_2082; target_1542	6	Met	0.540244
SLC34A3	1.72433	1.69947	0.0174622	0.288241	0.692369	1.62714	9784	8	target_2939; target_910; target_852; target_538; target_2092; target_2367	12	Met	0.540244
SLC9A7	1.99404	1.67785	0.0232348	0.288241	0.770631	1.55246	12832	5	target_1796; target_192; target_832; target_228; target_2023	6	Met	0.540244
SLC14A2	1.54368	1.6576	0.0272035	0.288241	0.762559	1.5362	15024	5	target_921; target_1887; target_2020; target_327	9	Met	0.540244
SLC1A4	1.46789	1.46592	0.0265932	0.288241	0.698263	1.57267	14862	7	target_1098; target_2502; target_999; target_2294; target_2506; target_1509	11	Met	0.540244
SLC6A2	1.6563	1.27409	0.0275599	0.288241	0.726022	1.5542	15325	6	target_1562; target_448; target_1878; target_2735; target_1589; target_280	20	Met	0.540244
SLC17A1	1.71767	1.75582	0.0316888	0.291756	0.852061	1.45348	17173	3	target_932; target_2099; target_1677	5	Met	0.534981
SLC28A2	1.64084	1.60393	0.0309581	0.291756	0.853274	1.45555	16777	3	target_716; target_302; target_661	6	Met	0.534981
SLC35F5	1.73421	1.77458	0.032914	0.292935	0.85004	1.45003	17837	3	target_1763; target_1934; target_234	6	Met	0.533229
SLC44A3	1.50037	1.37137	0.034726	0.299091	0.713476	1.52735	19310	6	target_2178; target_2141; target_1344; target_2467; target_1995; target_1477	10	Met	0.524196
SLC27A5	2.22652	2.22652	0.04045	0.330351	0.909091	1.38474	21592	2	target_384; target_1642	6	Met	0.481025
SLC30A2	1.76768	1.57226	0.0411334	0.330351	0.783259	1.4646	22521	4	target_1753; target_568; target_1770; target_678	6	Met	0.481025
SLC3A1	1.62396	1.52488	0.0443595	0.330351	0.833468	1.42176	24040	3	target_442; target_251; target_1166	5	Met	0.481025
SLC4A8	1.33488	1.37476	0.0445416	0.330351	0.644795	1.51533	24958	8	target_1427; target_2400; target_2152; target_2443; target_1584; target_2405; target_1136; target_2560	18	Met	0.481025
SLC39A8	1.25533	1.31439	0.0441038	0.330351	0.699865	1.49821	24525	6	target_944; target_794; target_1849; target_145; target_2416	16	Met	0.481025
SLC28A1	2.31892	2.31892	0.050755	0.331677	0.897778	1.36751	27093	2	target_1090; target_297	6	Met	0.479285
SLC7A7	1.79529	1.97807	0.0465131	0.331677	0.732247	1.47514	25689	5	target_2077; target_717; target_1613; target_2978	10	Met	0.479285
SLC13A4	2.20649	1.96932	0.0546408	0.331677	0.820938	1.40039	29612	3	target_633; target_2430; target_2571	6	Met	0.479285
SLC5A9	1.95063	1.95063	0.055916	0.331677	0.892525	1.35951	29848	2	target_1002; target_2580	6	Met	0.479285
SLC40A1	1.89273	1.89273	0.052411	0.331677	0.896162	1.36505	27977	2	target_1534; target_2070	3	Met	0.479285
SLCO3A1	1.67872	1.82959	0.0556493	0.331677	0.764538	1.4296	30469	4	target_2817; target_1187; target_482	5	Met	0.479285
SLC24A4	1.76163	1.74481	0.0513671	0.331677	0.726133	1.46282	28370	5	target_2090; target_450; target_2266; target_392; target_2017	12	Met	0.479285
SLC5A2	1.50668	1.5145	0.0490739	0.331677	0.827405	1.41142	26595	3	target_2611; target_451; target_1070	6	Met	0.479285
SLC2A9	1.62311	1.45073	0.0571428	0.331677	0.818108	1.39556	30968	3	target_2609; target_2893; target_1486	9	Met	0.479285
SLC11A2	1.21921	1.20742	0.0502003	0.331677	0.615751	1.50268	28226	9	target_749; target_1110; target_2113; target_2841; target_231; target_9; target_2878; target_23; target_12	22	Met	0.479285
SLC25A44	1.8017	1.99908	0.0624181	0.333451	0.812449	1.38591	33827	3	target_1299; target_636; target_1309	5	Met	0.476967
SLC39A5	1.81136	1.65228	0.0624441	0.333451	0.713592	1.43756	34488	5	target_2127; target_2242; target_2635; target_926; target_1896	11	Met	0.476967
SLC22A25	1.61909	1.64784	0.0620712	0.333451	0.812854	1.3866	33639	3	target_314; target_418; target_2179	5	Met	0.476967
SLCO5A1	1.48376	1.33814	0.062053	0.333451	0.713997	1.43837	34272	5	target_1633; target_982; target_587; target_1850; target_2714	12	Met	0.476967
SLC30A1	2.04827	2.04827	0.0860498	0.343764	0.865455	1.31828	45934	2	target_841; target_1933	5	Met	0.46374
SLC6A3	2.00702	2.00702	0.0764529	0.343764	0.873535	1.33058	40811	2	target_2523; target_742	4	Met	0.46374
SLC22A17	1.68687	1.82908	0.0877951	0.343764	0.733118	1.37084	48070	4	target_2154; target_1807; target_2211; target_321	12	Met	0.46374
SLC12A9	1.81663	1.81663	0.0692332	0.343764	0.88	1.34043	36957	2	target_2095; target_500	5	Met	0.46374
SLC9A6	2.05545	1.74314	0.0909738	0.343764	0.786176	1.34109	49303	3	target_132; target_149; target_82	6	Met	0.46374
SLC7A6	1.68518	1.68518	0.0906693	0.343764	0.861818	1.31274	48400	2	target_974; target_2327	6	Met	0.46374
SLC5A11	1.57193	1.67314	0.0911849	0.343764	0.730249	1.36548	49926	4	target_2693; target_1414; target_1761; target_1786	9	Met	0.46374
FLVCR2	1.52107	1.62972	0.0888051	0.343764	0.732248	1.36922	48623	4	target_2403; target_828; target_1920	11	Met	0.46374
SLC35F1	1.56688	1.59363	0.0741212	0.343764	0.745249	1.39353	40583	4	target_2491; target_2825; target_2685; target_1028	5	Met	0.46374
SLC2A7	1.56066	1.53757	0.0708357	0.343764	0.803961	1.37143	38389	3	target_1082; target_2755; target_2346	6	Met	0.46374
SLC38A6	1.41459	1.49258	0.0829935	0.343764	0.793048	1.35281	44978	3	target_1712; target_1985; target_2356	6	Met	0.46374
SLC26A9	1.7868	1.46225	0.0848184	0.343764	0.791431	1.35005	45967	3	target_2587; target_1837; target_434	6	Met	0.46374
SLC23A2	1.38671	1.39967	0.076648	0.343764	0.798707	1.36247	41539	3	target_2513; target_931; target_1394	10	Met	0.46374
SLC26A3	1.36616	1.37719	0.0894294	0.343764	0.787389	1.34316	48466	3	target_849; target_1411; target_1701	4	Met	0.46374
SLC38A3	1.44861	1.3599	0.0767274	0.343764	0.742822	1.38899	42010	4	target_987; target_1942; target_390; target_499	5	Met	0.46374
SLC5A1	1.57449	1.32544	0.0700737	0.343764	0.80477	1.37281	37976	3	target_695; target_2409; target_2051	11	Met	0.46374
SLC25A48	1.34936	1.29405	0.0659281	0.343764	0.753336	1.40865	36097	4	target_2134; target_2030; target_995; target_1521	6	Met	0.46374
SLC39A14	1.37585	1.12537	0.0831912	0.343764	0.69377	1.39763	45947	5	target_2019; target_780; target_1099; target_1094; target_2224	11	Met	0.46374
SLC20A2	1.06289	1.12377	0.0914129	0.343764	0.686893	1.38377	50488	5	target_2028; target_817; target_1893; target_2952; target_1230	9	Met	0.46374
SLC4A2	1.08615	0.98306	0.0827102	0.343764	0.630234	1.41945	46226	7	target_2727; target_1695; target_1365; target_2883; target_2165; target_2911	15	Met	0.46374
SLC8A3	1.1128	0.831068	0.0876538	0.343764	0.601751	1.41418	49116	8	target_150; target_140; target_19; target_78; target_22; target_30; target_71	11	Met	0.46374
SLC16A5	1.60768	1.40574	0.0944112	0.350108	0.684466	1.37888	52144	5	target_2834; target_747; target_1619; target_735; target_2713	13	Met	0.455798
SLC39A1	1.47596	1.74628	0.0961964	0.351842	0.683079	1.37609	53130	5	target_66; target_2637; target_965; target_565	16	Met	0.453653
SLC1A5	1.44291	1.37228	0.098849	0.356658	0.617347	1.39042	55246	7	target_1503; target_1689; target_2624; target_1249; target_843; target_2201; target_343	14	Met	0.447748
SLCO1B1	1.79651	2.08634	0.104992	0.362137	0.775011	1.32204	56900	3	target_598; target_318; target_458	3	Met	0.441127
SLC51A	1.60581	1.67623	0.102702	0.362137	0.72094	1.34807	56232	4	target_1960; target_2259; target_1156; target_3000	6	Met	0.441127
SLC13A3	1.26661	1.37325	0.107149	0.362137	0.717528	1.34169	58667	4	target_76; target_51; target_169	6	Met	0.441127
SLC2A12	1.36323	1.2599	0.104161	0.362137	0.775667	1.32316	56450	3	target_990; target_463; target_1611	6	Met	0.441127
SLC25A25	1.56497	1.19185	0.106111	0.362137	0.675566	1.36095	58606	5	target_2709; target_574; target_1046; target_2688; target_1793	13	Met	0.441127
SLC37A2	1.21786	1.22794	0.108872	0.36336	0.772029	1.31696	59003	3	target_1153; target_1492; target_2769	6	Met	0.439663
SLC46A2	1.27322	1.18373	0.111848	0.368685	0.714112	1.33531	61240	4	target_1385; target_1644; target_2047; target_1424	6	Met	0.433344
SLC35G1	1.59769	1.88656	0.115863	0.371113	0.767153	1.30864	62792	3	target_2022; target_608; target_1033	6	Met	0.430494
SLC39A4	1.60185	1.84447	0.12011	0.371113	0.665528	1.34073	66338	5	target_635; target_1063; target_1451; target_2663; target_2080	12	Met	0.430494
SLC10A1	1.70215	1.73879	0.11817	0.371113	0.765562	1.30593	64042	3	target_2918; target_2761; target_1997	6	Met	0.430494
SLC18A2	1.67817	1.67817	0.118306	0.371113	0.841212	1.28135	63153	2	target_2415; target_2979	5	Met	0.430494
SLC16A3	1.30426	1.41265	0.120924	0.371113	0.601996	1.35585	67584	7	target_2675; target_1559; target_2172; target_393; target_1262; target_2716; target_2424	29	Met	0.430494
SLC44A4	1.21746	1.1409	0.119303	0.371113	0.631323	1.35148	66343	6	target_2698; target_1258; target_109; target_1549; target_159; target_79	12	Met	0.430494
SLC26A1	1.75979	1.9331	0.122607	0.372002	0.762328	1.30041	66447	3	target_110; target_103; target_38	6	Met	0.429455
SLC25A42	1.78869	1.65906	0.130651	0.383338	0.701173	1.31111	71535	4	target_2702; target_914; target_2093; target_2256	6	Met	0.416418
SLC22A14	1.39252	1.44951	0.130285	0.383338	0.757074	1.29145	70608	3	target_1833; target_803; target_2916	5	Met	0.416418
SLC26A8	1.42395	1.38969	0.130421	0.383338	0.624244	1.33633	72526	6	target_141; target_770; target_1167; target_612; target_1821; target_100	13	Met	0.416418
SLC52A2	1.46627	1.47235	0.134298	0.389756	0.698746	1.30657	73532	4	target_922; target_1360; target_8; target_85	5	Met	0.409207
SLC7A4	1.80688	1.86035	0.138811	0.39491	0.751415	1.28179	75229	3	target_1186; target_303; target_336	6	Met	0.403502
SLC25A51	1.48508	1.59169	0.146166	0.39491	0.691252	1.29256	80030	4	target_471; target_2048; target_295	6	Met	0.403502
SLC17A6	1.449	1.57901	0.139786	0.39491	0.695189	1.29992	76537	4	target_2540; target_2156; target_1648	6	Met	0.403502
SLC19A3	1.44047	1.46825	0.142609	0.39491	0.748989	1.27766	77287	3	target_1463; target_2953; target_1366	6	Met	0.403502
SLC22A1	1.35189	1.42309	0.147906	0.39491	0.745647	1.27195	80158	3	target_2345; target_1330; target_300	6	Met	0.403502
SLC6A16	1.34364	1.39689	0.147757	0.39491	0.745756	1.27214	80077	3	target_941; target_1771; target_737	5	Met	0.403502
SLC26A6	1.36155	1.11996	0.146383	0.39491	0.648617	1.30666	80849	5	target_129; target_128; target_1756; target_1143; target_2497	12	Met	0.403502
SLC35B2	0.969098	0.974218	0.144619	0.39491	0.587045	1.32218	80827	7	target_18; target_14; target_31; target_2216; target_3; target_2778; target_28	18	Met	0.403502
SLC35G4	1.40193	1.40193	0.151754	0.401171	0.819394	1.24812	81008	2	target_2481; target_17	5	Met	0.396671
SLC35C1	1.83247	1.83247	0.157021	0.403493	0.816162	1.24319	83820	2	target_2112; target_858	5	Met	0.394164
SLC6A17	1.36558	1.3135	0.157166	0.403493	0.684594	1.28011	86053	4	target_332; target_2900; target_1190; target_690	6	Met	0.394164
SLC6A14	1.46753	1.13499	0.155193	0.403493	0.643253	1.29586	85715	5	target_930; target_558; target_2004; target_2779; target_2084	6	Met	0.394164
SLC4A5	1.66339	1.66339	0.164125	0.404394	0.811717	1.23642	87612	2	target_1248; target_2311	7	Met	0.393196
SLC38A9	1.47353	1.47353	0.165826	0.404394	0.810591	1.23471	88520	2	target_2360; target_656	6	Met	0.393196
SLC17A2	1.80108	1.39892	0.167352	0.404394	0.734034	1.25214	90697	3	target_2330; target_1653; target_2350	7	Met	0.393196
SLC26A7	1.56459	1.39246	0.168119	0.404394	0.635907	1.28106	92854	5	target_543; target_1580; target_1047; target_2007; target_947	9	Met	0.393196
SLC7A3	1.17911	1.17911	0.163022	0.404394	0.812315	1.23733	87023	2	target_2013; target_2800	5	Met	0.393196
SLC43A1	1.29006	1.10149	0.161854	0.404394	0.639439	1.28817	89394	5	target_893; target_1242; target_2527; target_1866; target_675	10	Met	0.393196
SLC41A3	1.25213	1.06307	0.16644	0.404394	0.60259	1.28997	92556	6	target_2398; target_1577; target_284; target_65; target_714; target_39	15	Met	0.393196
SLC38A2	1.88699	1.60157	0.172962	0.411757	0.7308	1.24663	93737	3	target_1154; target_265; target_1590	5	Met	0.385359
SLC16A7	1.61075	1.47874	0.174264	0.411757	0.674889	1.26196	95415	4	target_1991; target_2525; target_1403; target_791	9	Met	0.385359
SLC39A11	1.60619	1.60619	0.175865	0.411894	0.804848	1.22596	93879	2	target_1053; target_1575	6	Met	0.385215
SLC15A2	1.58368	1.58368	0.179072	0.415014	0.802828	1.22288	95591	2	target_797; target_1083	3	Met	0.381938
SLC5A10	1.18449	1.14169	0.180306	0.415014	0.629094	1.26733	99585	5	target_2290; target_2413; target_1798; target_2619; target_459	6	Met	0.381938
SLC30A9	1.54839	1.61207	0.187356	0.420934	0.722716	1.23284	101538	3	target_497; target_1138; target_2927	4	Met	0.375786
SLC6A15	1.76036	1.35501	0.185994	0.420934	0.723525	1.23422	100800	3	target_1708; target_445; target_257	6	Met	0.375786
SLC25A45	1.04249	0.888446	0.187607	0.420934	0.539895	1.26881	105125	8	target_144; target_135; target_1922; target_1460; target_41; target_64; target_147; target_859	12	Met	0.375786
SLC22A18	1.07762	0.925482	0.190037	0.422833	0.62393	1.25693	104960	5	target_630; target_2640; target_967; target_1779	12	Met	0.373831
SLC7A9	1.49462	1.72604	0.197576	0.4324	0.717057	1.22318	107077	3	target_275; target_1979; target_977	4	Met	0.364114
SLC47A1	1.56146	1.56146	0.196035	0.4324	0.793535	1.20873	104646	2	target_2639; target_2898	5	Met	0.364114
SLC7A11	1.35545	1.16905	0.199357	0.43275	0.716249	1.22181	108042	3	target_209; target_2303; target_970	6	Met	0.363763
SLC5A7	1.57061	1.57061	0.204877	0.441145	0.788638	1.20127	109366	2	target_1497; target_1008	6	Met	0.355418
SLCO2A1	1.84816	1.84816	0.214651	0.441474	0.783434	1.19334	114584	2	target_689; target_324	5	Met	0.355095
SLC23A1	1.77634	1.66566	0.230848	0.441474	0.700193	1.19442	125109	3	target_490; target_2412; target_1716	6	Met	0.355095
SLC10A4	1.537	1.537	0.242254	0.441474	0.769293	1.1718	129319	2	target_1656; target_2295	6	Met	0.355095
SLC46A3	1.4978	1.53503	0.237618	0.441474	0.696847	1.18871	128778	3	target_2273; target_1025; target_1718	6	Met	0.355095
SLC36A4	1.54477	1.5259	0.22644	0.441474	0.647555	1.21085	123983	4	target_2914; target_924; target_253; target_2468	11	Met	0.355095
SLC38A4	1.42358	1.4973	0.224248	0.441474	0.703414	1.19991	121532	3	target_2476; target_1561; target_246	6	Met	0.355095
SLC36A1	1.43203	1.45897	0.239504	0.441474	0.641211	1.19899	131136	4	target_2681; target_1023; target_1291; target_2101	6	Met	0.355095
SLC27A1	1.4118	1.42785	0.217025	0.441474	0.652244	1.21962	118828	4	target_1615; target_2144; target_517; target_807	6	Met	0.355095
SLC25A40	1.40641	1.40641	0.240162	0.441474	0.770505	1.17365	128202	2	target_1180; target_1013	6	Met	0.355095
SLC25A29	1.37797	1.38614	0.23717	0.441474	0.697034	1.18903	128535	3	target_603; target_1911; target_548	6	Met	0.355095
SLC35E1	1.32188	1.32188	0.243071	0.441474	0.768889	1.17119	129755	2	target_1593; target_672	6	Met	0.355095
SLCO1C1	1.26101	1.27262	0.214029	0.441474	0.577745	1.23678	119020	6	target_1682; target_2208; target_126; target_2263; target_2370; target_1597	10	Met	0.355095
SLC9B1	1.26221	1.26221	0.244712	0.441474	0.768081	1.16995	130631	2	target_758; target_1965	6	Met	0.355095
SLC22A7	1.34176	1.25768	0.235238	0.441474	0.69806	1.19078	127488	3	target_2539; target_2563; target_1287	6	Met	0.355095
SLC25A18	1.18046	1.2451	0.230212	0.441474	0.700485	1.19492	124764	3	target_1519; target_1233; target_1867	5	Met	0.355095
SLC22A11	1.62116	1.22007	0.220532	0.441474	0.705335	1.20319	119518	3	target_882; target_2602; target_2071	6	Met	0.355095
SLC39A13	1.35846	1.2175	0.20938	0.441474	0.710994	1.21284	113474	3	target_2414; target_1520; target_2660	6	Met	0.355095
SLC10A7	1.27646	1.20534	0.233565	0.441474	0.601942	1.21263	129001	5	target_964; target_1564; target_1620; target_2191; target_1662	6	Met	0.355095
SLC19A1	1.15716	1.18786	0.210953	0.441474	0.613155	1.23522	116512	5	target_1161; target_2711; target_1071; target_732; target_305	9	Met	0.355095
SLC38A5	1.1081	1.0808	0.207743	0.441474	0.58086	1.24345	115524	6	target_1465; target_1061; target_1663; target_2138; target_897; target_2055	6	Met	0.355095
SLC25A21	1.388	1.07849	0.231499	0.441474	0.602945	1.21465	127860	5	target_881; target_831; target_2188; target_2739; target_640	6	Met	0.355095
SLC43A3	0.890817	0.914214	0.236597	0.441474	0.566864	1.21349	131570	6	target_2; target_2393; target_13; target_2533; target_0; target_948	16	Met	0.355095
SLC35B4	0.893099	0.844485	0.236739	0.441474	0.642539	1.20147	129622	4	target_1346; target_2056; target_2776; target_1714	6	Met	0.355095
FLVCR1	1.37673	0.693505	0.230244	0.441474	0.60356	1.21589	127167	5	target_1401; target_2462; target_1422; target_2119; target_1112	6	Met	0.355095
SLC39A12	1.2631	1.3215	0.249399	0.44691	0.691188	1.17906	135163	3	target_2054; target_2694; target_1345	5	Met	0.34978
SLC4A4	1.21794	0.990577	0.259168	0.46132	0.632026	1.18181	141903	4	target_614; target_1059; target_868; target_1165	12	Met	0.335998
SLC39A2	1.50812	1.50812	0.276152	0.464321	0.753131	1.14718	147414	2	target_1528; target_542	6	Met	0.333182
SLC25A31	1.40522	1.40522	0.270187	0.464321	0.755903	1.15141	144230	2	target_1091; target_364	6	Met	0.333182
SLC2A11	1.30217	1.33002	0.273496	0.464321	0.625556	1.16972	149748	4	target_2318; target_2098; target_1594; target_1381	15	Met	0.333182
SLC5A12	1.26804	1.26804	0.271839	0.464321	0.755152	1.15026	145112	2	target_590; target_1747	3	Met	0.333182
SLC35G2	1.24902	1.24902	0.267559	0.464321	0.757172	1.15334	142827	2	target_2589; target_1280	6	Met	0.333182
SLC44A2	1.07851	1.08311	0.263048	0.464321	0.554814	1.1877	146279	6	target_1104; target_1420; target_2471; target_2962; target_1444; target_2001	12	Met	0.333182
SLC39A10	0.893347	0.939404	0.276506	0.464321	0.58212	1.1727	152718	5	target_1840; target_824; target_761; target_1831; target_2143	10	Met	0.333182
SLC25A26	1.15489	0.884469	0.275534	0.464321	0.679062	1.15837	149327	3	target_2307; target_2089; target_1748	10	Met	0.333182
SLC8A1	1.11924	0.478819	0.265449	0.464321	0.683646	1.16619	143861	3	target_53; target_1222; target_158	9	Met	0.333182
SLC7A2	1.41956	1.25027	0.28293	0.46631	0.675829	1.15286	153335	3	target_2568; target_2557; target_723	7	Met	0.331325
SLC24A5	1.03815	0.85658	0.281614	0.46631	0.621917	1.16291	154193	4	target_779; target_1583; target_475; target_1533	6	Met	0.331325
SLC38A1	0.870033	0.776429	0.280872	0.46631	0.519838	1.17081	156979	7	target_1604; target_40; target_57; target_1805; target_99; target_769; target_148	12	Met	0.331325
SLC6A13	1.50011	1.13522	0.287265	0.466489	0.619378	1.15816	157287	4	target_555; target_1044; target_1721; target_2988	6	Met	0.331159
SLC22A23	1.14091	1.1175	0.28828	0.466489	0.576861	1.16211	159221	5	target_1114; target_2140; target_142; target_83; target_131	12	Met	0.331159
SLC25A41	1.18029	1.01395	0.286478	0.466489	0.674212	1.1501	155258	3	target_2058; target_1482; target_3006	4	Met	0.331159
SLC4A3	1.53317	1.53317	0.295655	0.475541	0.744014	1.1333	157825	2	target_288; target_1170	4	Met	0.322812
SLC38A11	2.06726	2.06726	0.306551	0.476557	0.739054	1.12574	163642	2	target_887; target_1496	6	Met	0.321885
SLC9A4	1.41344	1.41344	0.300673	0.476557	0.741818	1.12995	160504	2	target_2773; target_2923	5	Met	0.321885
SLC28A3	1.37252	1.37252	0.306995	0.476557	0.73899	1.12564	163879	2	target_2876; target_685	6	Met	0.321885
SLC1A6	1.42828	1.33549	0.299924	0.476557	0.668149	1.13975	162545	3	target_2189; target_2946; target_1999	10	Met	0.321885
SLC1A7	1.45402	1.08576	0.306275	0.476557	0.665319	1.13493	165987	3	target_346; target_2200; target_1333	6	Met	0.321885
SLC27A2	1.13081	0.948355	0.302653	0.476557	0.666936	1.13769	164024	3	target_720; target_486; target_2543	6	Met	0.321885
SLC45A3	1.37593	1.41639	0.314521	0.481626	0.661681	1.12872	170456	3	target_2885; target_2014; target_919	5	Met	0.31729
SLC16A12	1.40646	1.40646	0.316587	0.481626	0.734545	1.11887	168999	2	target_1694; target_263	5	Met	0.31729
SLC25A5	1.61872	1.22243	0.317477	0.481626	0.660469	1.12665	172058	3	target_2342; target_489; target_404	6	Met	0.31729
SLC30A8	0.935395	1.05034	0.313138	0.481626	0.565939	1.1401	172951	5	target_2214; target_877; target_1566; target_2995; target_2657	16	Met	0.31729
SLC38A8	1.05981	0.868472	0.320309	0.483178	0.659256	1.12459	173593	3	target_615; target_2661; target_2616	6	Met	0.315893
SLC12A7	1.24031	1.43868	0.332142	0.485124	0.654164	1.1159	180006	3	target_423; target_1324; target_446	6	Met	0.314147
SLC35D1	1.17534	1.30945	0.325117	0.485124	0.657235	1.12114	176199	3	target_2286; target_219; target_566	6	Met	0.314147
SLC1A3	1.43837	1.12807	0.334384	0.485124	0.653193	1.11424	181221	3	target_2948; target_1092; target_1042	5	Met	0.314147
SLC6A5	1.26858	1.11548	0.326066	0.485124	0.602507	1.12662	178532	4	target_2396; target_455; target_588; target_1341	6	Met	0.314147
SLC20A1	1.07506	1.07506	0.336135	0.485124	0.726061	1.10595	179434	2	target_1269; target_2794	6	Met	0.314147
SLC4A11	0.907855	1.02434	0.329611	0.485124	0.559061	1.12625	182049	5	target_734; target_746; target_851; target_2185; target_2439	17	Met	0.314147
SLCO4A1	1.07944	0.839018	0.333739	0.485124	0.599272	1.12057	182733	4	target_2447; target_2176; target_1293; target_783	5	Met	0.314147
SLC25A36	0.829448	0.790285	0.329823	0.485124	0.655214	1.11769	178749	3	target_1343; target_847; target_1101	6	Met	0.314147
SLC25A28	1.28402	1.0811	0.338445	0.485833	0.597262	1.11681	185310	4	target_698; target_2306; target_2783; target_2194	6	Met	0.313513
SLC15A3	1.37357	1.36548	0.35414	0.48774	0.644974	1.10022	191928	3	target_1050; target_1152; target_2131	5	Met	0.311812
SLC2A14	1.09227	1.1553	0.354388	0.48774	0.59078	1.10469	194039	4	target_111; target_146; target_330; target_133	8	Met	0.311812
SLC25A14	1.15075	1.15075	0.350272	0.48774	0.72	1.09672	186981	2	target_2133; target_1757	6	Met	0.311812
SLC51B	1.06873	1.06873	0.34664	0.48774	0.721616	1.09918	185042	2	target_581; target_857	6	Met	0.311812
SLC9A2	0.99149	1.05041	0.351896	0.48774	0.645918	1.10183	190712	3	target_2655; target_520; target_1436	6	Met	0.311812
SLC22A9	1.04927	1.0286	0.346968	0.48774	0.647939	1.10528	188041	3	target_1918; target_1347; target_1379	4	Met	0.311812
SLC48A1	1.01974	1.01974	0.34942	0.48774	0.720404	1.09733	186526	2	target_1056; target_2343	6	Met	0.311812
SLC52A1	1.19108	1.01628	0.348266	0.48774	0.593207	1.10923	190687	4	target_1393; target_2673; target_2508; target_2819	6	Met	0.311812
UCP3	1.10823	1.04608	0.360274	0.493298	0.588354	1.10015	197262	4	target_1929; target_683; target_1371; target_2498	6	Met	0.30689
SLC6A20	1.416	1.06026	0.372231	0.50707	0.583502	1.09108	203809	4	target_1118; target_933; target_1252; target_1568	6	Met	0.294932
SLC47A2	1.17214	1.17214	0.376708	0.510564	0.708687	1.07948	201093	2	target_1244; target_2204	6	Met	0.29195
SLC22A8	1.4163	1.4163	0.390934	0.515927	0.702626	1.07025	208687	2	target_666; target_1913	6	Met	0.287412
SLC4A10	1.41235	1.41235	0.387043	0.515927	0.704242	1.07271	206610	2	target_1387; target_2697	6	Met	0.287412
SLC25A39	1.37887	1.37887	0.392479	0.515927	0.701818	1.06902	209512	2	target_1526; target_539	6	Met	0.287412
SLC35A2	1.29614	1.29614	0.38325	0.515927	0.705859	1.07518	204585	2	target_2691; target_1428	6	Met	0.287412
SLC35F2	1.16681	1.28895	0.394191	0.515927	0.628537	1.07218	213634	3	target_800; target_1941; target_627	6	Met	0.287412
SLC16A13	1.189	1.189	0.393381	0.515927	0.701414	1.06841	209993	2	target_700; target_1835	6	Met	0.287412
SLC34A2	1.12335	0.795071	0.387159	0.515927	0.535599	1.07898	213834	5	target_1462; target_1961; target_2813; target_1573; target_781	12	Met	0.287412
SLC3A2	1.05739	1.09573	0.396171	0.515989	0.573797	1.07293	216917	4	target_495; target_1962; target_1630; target_850	11	Met	0.28736
SLC9A1	1.20788	1.12237	0.403103	0.520392	0.624899	1.06598	218464	3	target_2750; target_2864; target_1762	5	Met	0.283669
SLC50A1	1.26752	0.847505	0.40345	0.520392	0.62474	1.06571	218652	3	target_1305; target_552; target_2840	12	Met	0.283669
SLC31A2	1.39074	1.39074	0.423971	0.521306	0.688792	1.04918	226323	2	target_1151; target_2170	6	Met	0.282908
SLC12A3	1.35278	1.35278	0.409105	0.521306	0.694949	1.05856	218387	2	target_1471; target_1846	6	Met	0.282908
SLCO1A2	1.30456	1.30456	0.426729	0.521306	0.687677	1.04748	227795	2	target_809; target_2079	3	Met	0.282908
SLC2A3	1.29544	1.29544	0.428672	0.521306	0.686869	1.04625	228832	2	target_855; target_1529	4	Met	0.282908
SLC9A5	1.29273	1.29273	0.428226	0.521306	0.686901	1.0463	228594	2	target_918; target_2931	6	Met	0.282908
SLC25A15	1.2421	1.2421	0.406269	0.521306	0.696162	1.06041	216873	2	target_424; target_665	6	Met	0.282908
SLC12A2	1.16093	1.16093	0.41699	0.521306	0.691717	1.05364	222596	2	target_885; target_2248	5	Met	0.282908
SLC2A13	1.13335	1.13335	0.414995	0.521306	0.692525	1.05487	221531	2	target_2280; target_2276	6	Met	0.282908
SLC15A1	1.07785	1.07785	0.426779	0.521306	0.687639	1.04742	227822	2	target_874; target_1454	6	Met	0.282908
SLC16A11	1.03893	1.03893	0.431493	0.521306	0.685657	1.0444	230338	2	target_2879; target_1741	6	Met	0.282908
SLC10A3	0.978804	0.978804	0.421045	0.521306	0.690101	1.05117	224761	2	target_2490; target_1504	6	Met	0.282908
SLC29A3	0.986311	0.967436	0.42121	0.521306	0.617623	1.05357	228277	3	target_2164; target_2870; target_2410	5	Met	0.282908
SLC10A2	0.900314	0.929296	0.426587	0.521306	0.561666	1.05025	233571	4	target_412; target_733; target_2949; target_2446	6	Met	0.282908
SLCO2B1	1.18769	0.883762	0.429961	0.521306	0.560332	1.04775	235418	4	target_1977; target_1783; target_2121; target_1256	12	Met	0.282908
SLC22A13	1.00559	1.21708	0.444726	0.534874	0.608262	1.0376	241022	3	target_2749; target_519; target_2448	4	Met	0.271749
SLC29A2	1.29216	1.29216	0.450932	0.536184	0.677576	1.0321	240715	2	target_353; target_617	6	Met	0.270686
SLC4A7	0.91216	0.91216	0.45184	0.536184	0.677172	1.03148	241200	2	target_1054; target_2128	9	Met	0.270686
SLC35A1	1.31038	0.906001	0.450422	0.536184	0.605901	1.03357	244109	3	target_350; target_1147; target_2158	6	Met	0.270686
SLC27A3	0.976809	0.904878	0.458644	0.54185	0.602668	1.02805	248565	3	target_2738; target_533; target_2184	6	Met	0.266121
SLC12A1	0.979845	0.979845	0.461494	0.542814	0.673131	1.02533	246353	2	target_1208; target_2781	5	Met	0.265349
SLC30A4	1.43245	1.43245	0.473044	0.551541	0.668283	1.01794	252519	2	target_373; target_2623	4	Met	0.258422
SLC35F6	1.02941	0.911126	0.472648	0.551541	0.543469	1.01622	258791	4	target_2289; target_726; target_2125; target_1223	6	Met	0.258422
SLC9A3	1.27336	1.27336	0.485844	0.554967	0.66303	1.00994	259352	2	target_2903; target_2129	6	Met	0.255733
SLC35C2	1.25881	1.25881	0.479438	0.554967	0.665455	1.01363	255932	2	target_1472; target_1295	5	Met	0.255733
SLC22A16	1.20088	1.20088	0.48245	0.554967	0.664242	1.01179	257540	2	target_697; target_2689	6	Met	0.255733
SLC46A1	1.08665	1.19592	0.490532	0.554967	0.589733	1.00599	265847	3	target_2636; target_2069; target_646	6	Met	0.255733
SLC35B3	1.03954	1.03954	0.486837	0.554967	0.662626	1.00932	259882	2	target_916; target_813	6	Met	0.255733
SLC26A2	0.964597	0.960188	0.490062	0.554967	0.589965	1.00639	265592	3	target_641; target_938; target_1692	6	Met	0.255733
SLC35D2	0.883392	0.883392	0.484885	0.554967	0.663434	1.01056	258840	2	target_1968; target_2192	6	Met	0.255733
SLC45A4	0.955644	0.746347	0.496298	0.55912	0.534169	0.998833	271740	4	target_2935; target_175; target_69; target_98	10	Met	0.252495
SLC37A1	0.828887	0.828887	0.49946	0.559701	0.657374	1.00132	266620	2	target_521; target_2254	6	Met	0.252044
SLC16A14	0.918792	0.708599	0.501006	0.559701	0.585691	0.999095	271523	3	target_1728; target_1193; target_2546	6	Met	0.252044
SLC7A10	1.03729	1.03729	0.511063	0.568557	0.652335	0.993649	272814	2	target_2105; target_1011	6	Met	0.245226
SLC25A53	1.3562	1.3562	0.521075	0.577291	0.648081	0.987168	278159	2	target_1264; target_1478	5	Met	0.238605
SLC35D3	1.21687	1.21687	0.527688	0.581505	0.645253	0.98286	281689	2	target_696; target_894	6	Met	0.235447
SLC25A19	0.988081	0.693856	0.529235	0.581505	0.574372	0.979787	286822	3	target_600; target_605; target_268	6	Met	0.235447
SLC16A10	0.952617	0.952617	0.534344	0.584713	0.642424	0.978552	285242	2	target_1461; target_2645	6	Met	0.233058
SLC25A33	1.30904	1.30904	0.540861	0.588193	0.639596	0.974244	288721	2	target_2873; target_2845	6	Met	0.23048
SLC18A1	1.21196	1.21196	0.541931	0.588193	0.639047	0.973409	289292	2	target_687; target_1484	6	Met	0.23048
SLC41A2	1.07499	1.07499	0.547386	0.588275	0.636768	0.969936	292204	2	target_259; target_1818	3	Met	0.23042
SLC37A4	1.00251	1.00251	0.552163	0.588275	0.634747	0.966859	294754	2	target_2117; target_2235	6	Met	0.23042
SLC10A6	0.956038	0.956038	0.551174	0.588275	0.635152	0.967474	294226	2	target_601; target_187	4	Met	0.23042
SLC24A1	0.88709	0.88709	0.550186	0.588275	0.635556	0.96809	293699	2	target_669; target_407	6	Met	0.23042
SLC38A10	0.743864	0.743864	0.553023	0.588275	0.634343	0.966243	295213	2	target_2843; target_511	6	Met	0.23042
SLC8A2	0.924076	0.600983	0.558078	0.591297	0.562872	0.96017	302454	3	target_1517; target_413; target_2594	5	Met	0.228194
SLC9A9	0.927157	0.927157	0.57713	0.609066	0.623838	0.950242	308082	2	target_531; target_1173	2	Met	0.215336
SLC14A1	0.963328	0.963328	0.606745	0.635298	0.610909	0.930548	323891	2	target_2509; target_808	6	Met	0.197023
SLCO4C1	0.691294	0.691294	0.60487	0.635298	0.611717	0.931779	322890	2	target_1200; target_2990	6	Met	0.197023
SLC22A12	1.12602	1.12602	0.614096	0.640483	0.607677	0.925624	327815	2	target_1743; target_1423	6	Met	0.193493
SLC29A1	0.748873	0.714633	0.62067	0.64482	0.484617	0.906176	339838	4	target_2595; target_2683; target_2766; target_1661	14	Met	0.190561
SLC25A23	0.799914	0.799914	0.623902	0.645667	0.603232	0.918854	333050	2	target_1160; target_403	6	Met	0.189992
SLC30A5	0.7714	0.777918	0.632656	0.652198	0.532336	0.90808	342872	3	target_802; target_2018; target_2106	6	Met	0.185621
SLCO6A1	1.05438	1.05438	0.648917	0.666387	0.591962	0.901687	346403	2	target_869; target_1304	5	Met	0.176273
SLC23A3	1.0241	1.0241	0.651964	0.666952	0.590707	0.899776	348030	2	target_1157; target_369	6	Met	0.175905
SLC11A1	0.625403	0.625403	0.655621	0.668133	0.589091	0.897314	349982	2	target_2757; target_1749	5	Met	0.175137
SLC6A9	0.995829	0.995829	0.667696	0.677851	0.583838	0.889313	356428	2	target_37; target_2770	11	Met	0.168865
SLC13A5	0.583501	0.583501	0.683031	0.690793	0.57697	0.878851	364614	2	target_1826; target_1266	6	Met	0.160652
SLC25A16	0.893786	0.893786	0.732799	0.73833	0.554343	0.844386	391181	2	target_2293; target_1992	6	Met	0.13175
SLC2A5	0.849346	0.849346	0.764042	0.766914	0.539827	0.822274	407859	2	target_3004; target_2792	6	Met	0.115253
SLC22A10	0.685161	0.685161	0.832717	0.832717	0.506263	0.771148	444519	2	target_2177; target_981	3	Met	0.0795027
