# Supplementary material for: Gain-of-function genetic screens in human cells identify SLC transporters overcoming environmental nutrient restrictions
Source: Life Sci Alliance. 2022 Sep 16;5(11):e202201404. doi: 10.26508/lsa.202201404 (PMC9481932; doi:10.26508/lsa.202201404)
Supplement: Supplementary file 8 [file LSA-2022-01404_TableS8.xlsx]

## Sheet: Suppl_Table_8_GWArg_rawcounts
guide	Arg_replA	Arg_replB	Recon_replA	Recon_replB
NM_015161-1	123	224	129	38
NM_021920-3	36	104	10	1
NM_002144-3	135	305	93	37
NM_017421-1	271	586	221	181
NM_001302-1	191	292	156	46
NM_001071-2	220	359	275	61
NM_001033087-2	48	114	24	5
NM_002725-1	141	318	248	36
NM_001242699-1	268	716	298	215
NM_001146-1	724	1451	654	356
NM_002966-1	170	400	201	139
NM_001004687-3	118	259	133	63
NM_003024-2	118	395	177	89
NM_001080976-2	60	182	78	30
NM_001126123-2	26	127	63	5
NM_001265-3	328	885	214	204
NM_004878-3	171	362	137	66
NM_014808-2	91	281	98	153
NM_001030001-3	274	709	385	244
NM_018425-1	47	100	72	23
NM_025049-1	119	91	66	61
NM_001278206-3	601	1200	659	199
NM_001144967-3	44	71	63	25
NM_001098531-1	162	393	215	49
NM_002509-3	23	73	1	21
NM_015035-1	258	501	227	151
NM_018467-3	71	195	47	43
NM_001013642-3	78	208	60	88
NM_000281-1	78	235	90	37
NM_004946-3	94	159	38	20
NM_001174130-3	180	385	189	85
NM_014170-2	420	1001	462	298
NM_001126106-1	131	246	86	70
NM_173201-3	86	177	202	58
NM_018008-3	82	167	56	20
NM_138285-3	278	468	163	85
NM_001005463-1	45	135	15	38
NM_001098484-1	168	378	177	97
NM_001042459-2	641	1330	440	301
NM_001177-2	420	1079	299	252
NM_003807-3	219	550	148	160
NM_006826-1	84	84	105	13
NM_032928-3	204	502	111	97
NM_003412-2	37	47	37	20
NM_024608-3	108	311	217	131
NM_001271088-3	137	395	174	69
NM_001098540-2	177	221	112	44
NM_001145809-2	152	208	202	34
NM_153034-1	279	594	204	76
NM_201379-2	75	390	49	54
NM_001406-2	28	40	79	17
NM_001290231-1	1087	2325	1191	489
NM_153343-1	252	406	162	235
NM_138734-2	125	323	54	41
NM_003500-1	171	362	85	120
NM_144660-1	94	302	175	99
NM_001048224-1	107	345	138	98
NM_001113491-3	70	117	45	12
NM_000623-3	55	175	44	178
NM_001017372-2	781	1695	802	477
NM_001077350-2	202	335	360	221
NM_001173466-2	40	159	2	1
NM_001005202-1	270	541	188	233
NM_000371-3	583	1143	486	294
NM_001128149-1	145	284	94	105
NM_001130685-2	221	534	226	78
NM_018008-2	55	52	41	24
NM_001202523-1	118	516	167	160
NM_001105677-3	253	283	346	193
NM_005808-1	59	144	104	38
NM_001276-2	585	1362	698	371
NM_012294-3	89	214	102	34
NM_000504-2	73	79	119	67
NM_031439-3	60	96	78	21
NM_001282657-2	129	211	44	53
NM_001278578-2	383	924	455	197
NM_006604-3	54	149	49	4
NM_001204294-1	167	309	222	97
NM_002991-3	98	430	149	44
NM_001760-1	131	267	67	15
NM_016272-2	88	255	43	144
NM_012338-2	164	308	22	20
NM_001184924-2	148	348	77	92
NM_182832-3	119	155	67	26
NM_020718-2	169	332	217	70
NM_001042437-1	234	606	75	123
NM_001031743-3	143	401	88	66
NM_021926-3	61	137	68	22
NM_000172-2	174	379	301	113
NM_003245-3	43	105	27	16
NM_001282731-1	197	541	129	88
NM_002291-1	129	241	225	138
NM_032973-3	326	730	410	209
NM_032310-2	81	165	76	30
NM_001037331-1	312	845	311	249
NM_006827-3	118	315	159	11
NM_001037582-1	103	285	86	102
NM_015135-2	236	647	204	84
NM_014793-3	42	180	53	41
NM_003322-1	536	1015	440	282
NM_001191033-1	135	257	118	12
NM_138456-3	339	639	414	208
NM_001098534-3	209	538	193	95
NM_001164688-1	59	262	86	17
NM_133448-2	150	277	139	80
NM_001165927-1	340	856	343	142
NM_001017415-2	166	579	440	99
NM_001256615-1	195	431	106	246
NM_021109-3	91	488	116	28
NM_001080538-1	258	539	277	325
NM_004888-1	79	194	143	59
NM_001243940-3	107	380	76	53
NM_002835-2	115	220	80	79
NM_014143-3	311	1023	234	158
NM_003394-1	200	557	87	195
NM_001256213-3	4	51	7	0
NM_033656-2	112	154	143	25
NM_003150-2	140	201	131	33
NM_001195483-3	224	437	241	105
NM_001242698-3	309	679	229	243
NM_001130478-2	176	237	155	135
NM_001168478-3	86	329	70	130
NM_032233-3	68	112	26	31
NM_182513-1	170	683	162	208
NM_006343-1	246	563	313	143
NM_001278320-3	317	480	237	133
NM_001012973-2	162	358	64	179
NM_001271854-2	388	730	263	247
NM_001007527-2	195	817	281	135
NM_006151-2	41	91	33	4
NM_001242534-1	55	84	126	49
NM_152304-2	146	241	106	78
NM_176882-1	316	550	119	129
NM_015417-1	96	267	104	25
NM_153758-2	163	300	137	30
NM_001288961-1	222	642	205	257
NM_152603-2	124	221	127	20
NM_017643-1	277	568	238	224
NM_017900-3	319	621	180	113
NM_001702-1	89	330	173	93
NM_001271015-1	214	601	90	123
NM_032578-2	270	531	195	94
NM_031924-3	114	375	143	19
NM_001178014-2	156	279	103	97
NM_031960-3	112	186	169	45
NM_001039517-3	533	823	407	233
NM_001001485-2	381	906	458	269
NM_006309-3	314	500	150	164
NM_000457-3	80	447	54	66
NM_014657-1	112	243	83	71
NM_080672-1	73	144	68	27
NM_004195-2	241	382	183	94
NM_017797-2	70	127	21	45
NM_005720-3	402	823	385	188
NM_001013653-1	49	416	114	204
NM_001618-1	200	317	77	82
NM_148896-3	197	463	313	42
NM_007084-1	242	619	427	105
NM_001199281-3	45	152	84	11
NM_014945-3	211	671	183	56
NM_001278615-1	247	684	187	200
NM_004661-1	219	526	297	148
NM_012159-1	264	404	107	142
NM_001099403-1	41	119	124	0
NM_001116-3	36	202	103	22
NM_171982-3	419	817	341	288
NM_024813-2	140	215	124	135
NM_007240-1	151	473	166	108
NM_176881-1	255	644	84	91
NM_019859-2	76	191	55	72
NM_001171631-3	400	679	226	157
NM_001012413-3	470	1024	550	399
NM_152901-2	249	475	141	150
NM_005385-3	88	176	50	33
NM_001242673-3	100	274	25	38
NM_001198-1	524	1121	485	311
NM_001007125-3	444	876	483	375
NM_002034-1	190	375	128	61
NM_203406-1	53	34	60	32
NM_001081491-3	241	431	186	84
NM_032326-3	84	261	170	40
NM_001143783-3	200	331	227	181
NM_001167940-3	77	191	78	56
NM_016010-2	587	1280	514	190
NM_002424-1	665	1989	578	288
NM_005706-2	158	296	118	71
NM_024015-1	66	101	57	21
NM_001282474-1	89	150	57	3
NM_021201-1	495	1121	748	297
NM_001286167-3	67	212	46	36
NM_206920-2	144	394	122	83
NM_001164615-1	874	1882	655	371
NM_001204052-3	111	425	302	97
NM_001286106-1	165	357	243	125
NM_006904-3	87	134	109	0
NM_006322-1	74	176	89	30
NM_001184888-1	67	159	30	40
NM_001131025-2	210	258	131	112
NM_003123-2	384	750	389	283
NM_012307-2	292	667	209	154
NM_152723-2	130	209	74	37
NM_033107-2	130	183	33	51
NM_005733-2	200	440	157	57
NM_014909-3	70	280	50	54
NM_001040633-3	124	254	153	186
NM_001215-3	56	151	4	25
NM_001001329-3	111	213	88	31
NM_201590-1	441	1217	663	246
NM_003640-1	189	415	170	85
NM_175886-1	390	1329	558	195
NM_001278270-2	301	726	186	129
NM_001005181-3	139	313	137	107
NM_015484-3	119	343	61	88
NM_001284417-1	465	904	438	295
NM_001271282-3	267	771	198	121
NM_031911-2	78	257	120	52
NM_001198851-3	99	195	53	59
NM_004671-1	74	372	164	81
NM_001282848-1	198	465	150	134
NM_006714-2	178	300	185	27
NM_001135701-3	57	107	41	4
NM_013359-1	300	570	214	101
NM_001244713-2	676	1145	589	161
NM_001195386-2	62	232	64	61
NM_001174138-1	139	282	127	78
NM_001143980-1	176	593	193	133
NM_001257159-2	446	765	472	135
NM_014665-1	152	429	160	110
NM_001290252-3	151	415	179	35
NM_001039690-2	49	144	97	24
NM_001199303-3	77	219	178	50
NM_001381-3	62	239	129	43
NM_001387-3	400	1083	403	221
NM_001204760-3	216	496	200	149
NM_001199464-1	528	1416	607	364
NM_017586-1	435	994	306	141
NM_001270433-3	196	390	134	146
NM_001146051-2	110	276	174	42
NM_002221-2	54	208	13	114
NM_005227-1	155	177	216	43
NM_001127198-2	157	156	49	44
NM_006300-3	271	492	234	146
NM_000154-3	75	221	41	2
NM_203299-1	117	317	18	124
NM_001190201-2	54	191	40	27
NM_001806-2	346	546	187	75
NM_006552-3	199	328	36	166
NM_001127207-1	108	186	53	33
NM_000965-2	205	312	197	149
NM_001288780-2	243	754	149	117
NM_001080456-1	124	229	152	95
NM_001161452-3	389	793	360	261
NM_003471-1	330	717	361	215
NM_017895-2	57	114	68	37
NM_054108-3	167	389	201	48
NM_181652-1	177	268	225	83
NM_017867-3	287	777	189	135
NM_002186-3	220	692	343	183
NM_004803-3	185	338	253	54
NM_004229-2	91	242	167	139
NM_173567-1	210	559	249	195
NM_024831-1	200	362	129	91
NM_001168243-3	297	833	187	247
NM_021934-2	192	199	168	77
NM_001001922-3	120	151	66	49
NM_001202502-1	89	288	116	96
NM_001123040-3	196	330	204	86
NM_001400-3	190	330	176	91
NM_001002919-3	158	310	142	61
NM_000184-1	252	621	124	118
NM_001291420-3	272	625	359	316
NM_023072-1	29	30	34	3
NM_002253-2	373	1038	347	205
NM_031426-1	306	625	304	229
NM_002113-1	162	433	193	52
NM_020169-2	120	181	160	41
NM_002639-3	521	1240	495	176
NM_001042729-2	158	283	256	107
NM_031424-2	151	419	233	102
NM_001014763-3	241	527	280	67
NM_021071-1	103	298	131	85
NM_001752-3	156	381	186	82
NM_003325-3	161	308	149	122
NM_020825-1	22	67	40	46
NM_001127448-1	155	306	103	42
NM_001170792-2	262	398	137	153
NM_014224-1	1556	3204	1458	858
NM_001242338-1	88	151	190	8
NM_005011-3	66	224	80	101
NM_152543-1	251	578	291	228
NM_001284253-1	141	359	178	162
NM_021636-2	350	960	421	292
NM_001145678-3	317	534	409	112
NM_175566-2	373	1000	299	243
NM_021145-1	152	228	249	58
NM_016257-2	47	66	4	59
NM_001142704-2	532	894	300	298
NM_001149-3	210	424	275	205
NM_016546-2	182	473	122	165
NM_001278544-2	16	56	0	41
NM_152889-3	53	132	7	71
NM_005586-1	127	250	51	38
NM_001252020-3	106	486	157	26
NM_001199456-2	83	177	78	57
NM_001004751-2	88	235	51	12
NM_000107-3	80	343	105	37
NM_001111031-2	81	158	49	48
NM_001177311-1	137	215	176	40
NM_001001521-2	195	408	61	87
NM_014371-1	135	301	96	63
NM_001775-2	135	306	51	167
NM_198697-2	265	460	177	103
NM_001077188-2	49	129	21	96
NM_145052-2	199	638	212	127
NM_152763-1	137	317	125	57
NM_001284518-2	196	565	192	102
NM_003140-3	115	147	80	145
NM_016271-3	184	584	182	160
NM_001282982-3	212	522	289	124
NM_001008777-2	33	133	102	21
NM_002184-2	68	316	71	1
NM_001014985-2	225	665	259	63
NM_001277818-3	100	163	132	90
NM_001287188-3	224	323	269	98
NM_003598-1	575	1859	508	335
NM_001282928-3	423	847	497	197
NM_173207-1	349	959	407	205
NM_001160233-1	527	1157	610	295
NM_033328-3	122	310	123	57
NM_001256512-2	157	525	213	123
NM_018271-1	262	679	196	333
NM_002711-1	209	567	143	80
NM_001002034-2	97	299	96	18
NM_015063-2	77	185	10	52
NM_020840-1	102	126	30	51
NM_007267-3	258	347	167	66
NM_178544-3	197	543	194	120
NM_032859-2	357	1040	325	353
NM_001080463-3	150	193	152	49
NM_206933-2	280	439	203	228
NM_001004727-2	62	339	47	114
NM_025212-2	76	184	111	23
NM_005339-1	108	157	46	146
NM_031474-3	79	260	122	19
NM_005654-3	217	466	48	83
NM_173555-3	224	316	25	83
NM_152999-3	148	278	40	84
NM_004524-1	42	130	22	5
NM_080705-2	247	580	232	276
NM_001282506-3	327	637	178	220
NM_175733-1	45	132	58	69
NM_001130100-3	90	163	9	18
NM_001729-2	110	223	139	10
NM_001040663-2	4941	12751	5072	2902
NM_001145299-3	199	328	85	167
NM_006816-1	87	237	76	70
NM_003820-2	204	420	59	76
NM_001289909-1	364	884	302	278
NM_013286-2	78	194	66	1
NM_000697-1	813	1822	795	267
NM_001764-2	151	339	93	40
NM_182729-3	230	504	225	141
NM_005274-2	52	115	14	58
NM_001278513-1	108	360	208	93
NM_025248-3	109	150	107	76
NM_022171-2	96	407	163	156
NM_018488-2	229	829	104	193
NM_001004693-2	407	973	483	444
NM_198380-1	259	618	253	79
NM_022733-3	194	337	150	39
NM_001289608-1	107	204	37	61
NM_005410-2	309	786	439	167
NM_153376-2	81	190	83	18
NM_175569-2	95	280	144	88
NM_001839-3	212	535	303	89
NM_001690-3	238	503	152	57
NM_001286843-2	207	302	72	25
NM_032783-1	177	414	272	289
NM_001199779-1	116	411	103	15
NM_002639-1	264	467	166	258
NM_001142864-1	85	183	82	104
NM_001112802-3	320	621	174	215
NM_000529-3	220	535	235	142
NM_173694-3	45	158	71	57
NM_022124-1	70	78	32	56
NM_001284324-2	1031	2043	873	323
NM_199320-3	429	805	318	246
NM_024805-2	60	98	32	16
NM_006663-3	79	259	99	123
NM_182566-1	152	342	131	29
NM_014238-1	485	1218	298	360
NM_031923-1	343	747	238	150
NM_001289171-3	340	761	246	194
NM_006869-3	49	71	23	23
NM_001282644-2	193	397	91	143
NM_017844-3	523	1500	540	192
NM_018054-2	100	174	114	62
NM_001243610-3	150	307	208	84
NM_018229-3	274	656	217	120
NM_003846-3	178	390	34	111
NM_032679-3	199	456	269	98
NM_005588-1	590	1274	373	288
NM_005406-3	63	107	126	33
NM_001005328-2	173	443	74	64
NM_001135040-1	329	660	211	142
NM_001286751-2	402	826	168	211
NM_014935-3	193	462	307	88
NM_021199-2	161	424	155	146
NM_002767-1	82	314	198	61
NM_001190964-2	30	85	7	1
NM_001017523-1	175	406	192	35
NM_173680-1	397	853	256	180
NM_018584-3	123	183	57	22
NM_001031722-3	271	390	224	158
NM_000793-3	151	469	194	116
NM_001986-2	140	414	143	50
NM_002260-1	218	387	110	117
NM_005694-2	241	662	307	144
NM_152630-1	376	849	555	105
NM_194293-1	347	666	508	166
NM_022100-3	161	291	166	109
NM_003164-2	61	136	68	40
NM_013410-1	120	299	112	149
NM_004705-3	84	145	22	90
NM_002787-1	135	556	175	76
NM_001290312-1	642	1018	322	141
NM_058165-3	34	129	52	9
NM_012426-3	642	1367	660	383
NM_138464-2	154	380	138	101
NM_001321-2	72	241	37	35
NM_021163-3	128	301	66	107
NM_001282462-3	418	911	320	257
NM_152499-2	106	312	75	95
NM_005994-1	51	159	30	13
NM_019024-2	95	180	68	5
NM_181615-2	210	402	253	107
NM_001277224-2	115	168	63	54
NM_003563-3	45	99	47	31
NM_001276342-1	177	496	76	23
NM_053278-3	321	565	136	142
NM_001123396-2	209	216	159	76
NM_145243-1	116	168	116	71
NM_001080450-2	59	177	61	50
NM_004439-1	430	1180	465	449
NM_014770-1	167	365	77	85
NM_001011722-2	202	330	226	133
NM_032834-2	82	228	103	36
NM_001083113-1	154	275	215	87
NM_005190-3	98	193	79	11
NM_001146254-2	209	417	196	74
NM_004263-2	115	286	238	60
NM_001195007-2	72	331	27	44
NM_153211-2	241	316	198	160
NM_176819-1	203	521	133	113
NM_144614-2	487	810	566	179
NM_001204862-3	56	97	9	4
NM_001017417-1	278	679	214	189
NM_003216-2	97	263	193	41
NM_001146686-2	153	317	234	98
NM_018154-1	173	362	193	94
NM_015250-1	111	170	138	77
NM_001242659-1	87	215	109	32
NM_153603-3	297	581	96	200
NM_001203244-1	225	626	401	173
NM_001136501-1	161	300	57	97
NM_006545-1	157	591	242	101
NM_001001954-2	131	167	74	110
NM_004690-2	243	713	169	176
NM_001079537-2	513	1282	757	463
NM_024322-2	103	264	44	82
NM_000696-2	333	652	364	134
NM_001284297-3	232	459	154	129
NM_152315-2	78	265	218	74
NM_001198619-2	132	246	104	71
NM_031844-2	78	170	75	64
NM_033179-1	226	627	324	84
NM_173681-1	147	467	131	92
NM_002546-2	137	229	61	56
NM_016059-2	373	719	349	87
NM_001077351-1	477	864	431	235
NM_022139-1	42	206	16	6
NM_133640-3	206	388	138	88
NM_001290062-3	52	104	68	50
NM_001195545-2	328	455	326	49
NM_025250-3	119	277	112	85
NM_012233-2	105	186	98	126
NM_205548-1	173	349	242	71
NM_001636-1	141	368	95	105
NM_001271641-3	68	292	117	97
NM_182915-1	161	422	211	92
NM_004518-3	168	418	153	135
NM_006455-2	33	70	119	73
NM_144635-2	204	317	135	132
NM_007059-3	126	215	101	67
NM_000362-2	357	668	262	188
NM_172250-2	169	384	240	113
NM_181306-1	384	641	229	149
NM_001193528-2	203	445	66	210
NM_022733-1	246	505	394	171
NM_199037-1	177	240	104	56
NM_000057-1	364	568	361	176
NM_153268-3	62	216	92	35
NM_015322-2	209	625	218	380
NM_181725-1	368	1106	529	212
NM_006011-1	111	211	98	34
NM_012284-2	107	215	68	110
NM_001127197-2	130	393	284	115
NM_022054-1	109	211	154	6
NM_014398-2	76	304	46	76
NM_016240-3	89	120	57	26
NM_020817-3	112	330	256	61
NM_001170723-3	160	270	113	66
NM_016395-2	96	230	147	50
NM_001286813-3	101	310	50	67
NM_001144954-3	316	1065	318	146
NM_173462-3	197	835	205	278
NM_001977-1	591	1006	429	289
NM_006341-1	261	653	325	261
NM_003522-3	329	843	174	113
NM_001201481-2	193	377	102	41
NM_001256820-2	357	1091	438	298
NM_001012418-3	94	253	47	48
NM_001129765-3	409	820	493	377
NM_001257281-1	139	327	148	115
NM_001205252-3	97	278	23	48
NM_014729-1	111	348	117	99
NM_145235-2	211	322	229	123
NM_014945-2	377	751	466	403
NM_004466-2	58	150	23	25
NM_001135937-1	44	177	19	40
NM_001282559-1	628	1222	447	394
NM_003593-2	195	587	173	110
NM_207356-3	106	210	125	27
NM_006408-1	282	805	248	226
NM_001204265-2	220	527	107	43
NM_000978-2	188	511	155	102
NM_001042437-3	239	398	141	75
NM_001282915-1	439	1162	343	431
NM_024821-3	42	96	85	24
NM_001010922-2	277	698	157	138
NM_001278263-3	114	294	101	75
NM_003488-1	119	259	86	115
NM_001145805-1	216	308	258	142
NM_001177591-2	427	795	279	205
NM_017789-3	61	249	208	13
NM_001279356-1	391	966	494	264
NM_021955-1	266	613	218	174
NM_001080464-1	93	143	117	30
NM_001135054-3	136	459	106	70
NM_145863-2	102	307	31	92
NM_000196-2	170	402	95	91
NM_001161522-1	246	398	232	237
NM_016305-2	80	271	48	79
NM_133465-2	53	64	79	17
NM_001013650-1	241	605	171	227
NM_001286137-1	193	396	152	75
NM_002235-3	185	318	89	49
NM_001291732-2	40	126	90	37
NM_014615-2	204	451	289	193
NM_007355-1	212	420	141	95
NM_001278214-3	64	144	14	19
NM_021027-1	167	320	61	66
NM_001177880-1	356	983	508	87
NM_023917-1	137	282	153	39
NM_001286993-3	205	487	54	38
NM_018025-1	77	125	103	45
NM_001193288-2	444	879	291	186
NM_004720-3	80	314	64	36
NM_001290983-2	187	395	136	120
NM_052937-2	58	190	50	11
NM_015668-2	140	219	108	3
NM_198498-2	433	885	238	215
NM_006355-2	158	399	196	102
NM_003214-1	90	95	62	138
NM_015303-2	349	704	283	178
NM_001011724-2	104	525	155	138
NM_001127716-2	186	315	227	81
NM_001102664-1	123	234	133	33
NM_004523-3	41	125	77	12
NM_017721-3	178	465	91	52
NM_001256795-2	58	239	80	84
NM_001146114-2	102	314	92	91
NM_021202-2	65	135	24	46
NM_145715-2	136	372	163	55
NM_021619-2	104	188	98	68
NM_003500-2	129	248	188	98
NM_001278208-2	202	519	188	101
NM_000799-3	61	112	63	24
NM_006954-2	319	784	211	211
NM_020848-3	112	108	116	36
NM_015585-1	118	332	115	40
NM_018848-1	22	52	68	37
NM_152263-3	105	351	151	33
NM_015328-2	65	147	62	28
NM_001005186-2	257	494	221	96
NM_001242575-3	76	187	46	16
NM_001278482-1	129	260	80	7
NM_001098805-2	329	993	317	261
NM_014618-3	177	214	118	52
NM_001198993-3	206	564	246	160
NM_153370-3	141	361	165	107
NM_004522-2	94	262	127	87
NM_003071-2	26	119	0	16
NM_001005203-3	284	661	277	76
NM_004844-2	463	1372	352	325
NM_004710-1	279	793	275	190
NM_001001663-3	225	670	234	164
NM_033068-2	197	510	329	162
NM_020864-2	160	338	91	62
NM_001242904-3	92	225	37	10
NM_001146321-1	217	389	352	222
NM_025081-3	61	24	29	27
NM_004867-2	127	441	161	4
NM_014746-2	116	415	102	93
NM_182547-3	209	753	259	138
NM_001201536-2	157	368	152	32
NM_001197113-2	183	475	119	77
NM_001040431-1	403	899	394	117
NM_001184997-2	149	386	90	65
NM_000150-1	203	399	185	216
NM_016161-1	252	341	178	119
NM_017774-2	232	692	269	112
NM_145912-2	78	232	102	108
NM_001198671-1	140	334	45	85
NM_006601-3	135	206	49	150
NM_001288633-2	314	711	384	361
NM_001097604-1	1366	3653	1149	681
NM_006510-2	288	696	273	99
NM_001048209-2	165	441	117	39
NM_022461-2	59	150	141	24
NM_001288819-2	99	238	88	93
NM_001130058-2	82	122	91	108
NM_001079537-3	143	322	168	149
NM_001040097-3	347	750	110	146
NM_001197113-3	335	511	258	118
NM_003026-2	75	200	127	22
NM_001099737-1	112	255	88	50
NM_177444-2	53	192	50	32
NM_018927-2	150	400	131	91
NM_001136494-3	200	317	63	20
NM_133464-1	282	475	233	191
NM_006292-1	594	1553	658	561
NM_203303-3	231	675	198	208
NM_001135729-2	128	257	115	51
NM_018184-2	277	553	108	259
NM_001042590-1	122	242	170	41
NM_152489-3	188	375	177	153
NM_001257210-1	752	1570	785	693
NM_005178-2	36	32	4	4
NM_001017915-1	140	335	95	177
NM_022377-1	293	758	239	160
NM_007213-2	83	336	129	51
NM_001135676-1	273	453	370	162
NM_004723-1	33	38	30	24
NM_001749-2	101	112	43	13
NM_001098811-1	130	216	122	104
NM_080283-2	157	278	91	42
NM_004711-2	111	155	50	25
NM_001127215-3	177	404	186	128
NM_001135806-1	98	339	147	50
NM_001170803-2	287	572	225	51
NM_014704-3	125	262	129	32
NM_005769-3	607	1104	514	241
NM_002720-1	365	1011	419	233
NM_015481-2	274	755	245	312
NM_001130102-1	179	441	159	195
NM_014470-2	408	744	140	129
NM_002706-3	100	331	157	168
NM_022580-2	187	374	249	96
NM_000882-1	237	796	260	81
NM_001171183-2	151	218	90	76
NM_173856-1	241	495	147	221
NM_001130032-2	217	506	221	115
NM_025004-2	135	287	234	48
NM_000384-1	217	591	205	100
NM_001014811-2	251	457	247	144
NM_001143832-3	58	162	14	59
NM_015941-3	127	302	86	63
NM_014654-1	70	99	18	31
NM_001513-1	297	945	379	114
NM_000080-2	190	449	204	146
NM_001135054-2	163	397	196	100
NM_001282414-1	106	210	38	42
NM_001271882-1	58	207	83	26
NM_080612-1	379	606	320	164
NM_001104631-1	136	347	95	75
NM_020156-2	151	479	127	105
NM_014903-3	197	321	155	96
NM_005124-2	443	822	657	382
NM_004140-3	299	1193	358	194
NM_001282530-2	163	477	78	74
NM_025151-1	147	345	139	105
NM_001145056-1	175	633	205	147
NM_007253-1	291	771	281	183
NM_152720-3	131	198	90	99
NM_053043-3	269	429	182	147
NM_181702-1	261	517	211	289
NM_001280-1	255	419	237	155
NM_022103-2	106	153	74	153
NM_021148-3	127	160	149	125
NM_178468-2	725	1870	622	520
NM_001130688-2	129	337	60	49
NM_007006-1	124	329	102	56
NM_001202449-1	241	604	205	89
NM_001145123-2	134	405	101	115
NM_000835-3	151	319	96	85
NM_006447-2	198	402	42	26
NM_001193280-1	480	731	262	147
NM_005872-2	173	538	174	87
NM_001142536-1	177	594	186	53
NM_001270391-1	236	612	161	165
NM_021148-1	269	783	359	155
NM_001932-3	116	365	218	109
NM_019021-3	42	197	44	0
NM_001146-3	243	501	189	282
NM_005609-1	191	482	304	67
NM_001127665-2	142	264	155	162
NM_001690-2	69	210	55	12
NM_005860-2	85	182	90	25
NM_015994-3	115	328	156	36
NM_014344-3	236	673	280	142
NM_198501-2	315	501	380	136
NM_000840-2	509	1036	309	162
NM_001124758-2	129	163	23	11
NM_001190822-1	489	1318	377	304
NM_001184776-2	158	312	310	110
NM_005759-3	90	220	146	10
NM_014468-2	398	1073	162	249
NM_001165-2	84	321	105	25
NM_001851-1	196	515	104	68
NM_031422-1	594	1415	690	352
NM_024875-1	153	339	203	60
NM_002952-2	78	181	114	24
NM_023016-2	166	341	242	31
NM_016310-2	253	388	294	171
NM_001042423-1	93	154	34	54
NM_000447-3	207	606	237	209
NM_001160392-3	119	405	209	99
NM_001290048-1	165	422	166	43
NM_002950-3	312	626	265	84
NM_001001521-3	26	133	47	5
NM_005623-2	385	786	316	301
NM_020949-3	92	199	112	176
NM_001079668-2	65	176	71	84
NM_001261415-3	209	604	185	126
NM_005426-2	99	139	49	72
NM_001166119-3	193	541	100	64
NM_203399-2	104	268	109	80
NM_001284400-1	280	948	144	51
NM_001168235-2	75	286	56	83
NM_000972-2	65	100	11	129
NM_004540-3	73	89	79	89
NM_001002907-1	113	356	82	62
NM_001282617-1	236	640	212	180
NM_001070-1	83	61	149	59
NM_003517-1	191	352	227	187
NM_021647-1	106	232	111	105
NM_199051-1	203	486	166	177
NM_001884-3	81	162	26	8
NM_001243795-1	0	0	0	0
NM_002737-3	128	304	119	86
NM_005972-3	78	280	166	157
NM_001284213-2	167	340	226	176
NM_001099405-2	763	1666	657	516
NM_014262-1	58	266	52	25
NM_001037232-1	78	293	140	18
NM_198393-1	287	649	190	188
NM_001136161-3	291	556	211	68
NM_032266-2	173	327	184	89
NM_021134-3	39	110	74	11
NM_203425-3	152	197	66	90
NM_001172688-1	520	1321	338	168
NM_025263-2	182	417	251	256
NM_001282440-2	202	425	303	33
NM_012184-3	58	168	76	90
NM_007214-3	66	172	14	1
NM_014946-3	99	207	72	112
NM_001120-1	101	371	95	73
NM_001258383-3	232	562	193	120
NM_001256272-3	152	136	20	80
NM_001168357-2	174	574	153	108
NM_144586-3	236	405	120	69
NM_016449-3	75	377	63	60
NM_001167576-3	553	978	362	187
NM_005140-2	463	1058	408	184
NM_020452-3	194	459	241	67
NM_006231-2	171	432	144	76
NM_001286634-1	115	236	211	21
NM_138774-3	254	692	492	114
NM_194442-2	687	1748	519	477
NM_001195416-3	364	743	211	134
NM_001269052-1	857	1687	748	293
NM_145257-2	95	300	193	37
NM_030981-2	107	297	96	55
NM_003183-2	73	93	26	20
NM_024089-1	158	358	96	88
NM_005650-2	319	673	262	175
NM_001253815-3	274	361	173	107
NM_172251-1	188	352	255	55
NM_005508-3	222	373	177	87
NM_001172772-2	91	185	90	62
NM_001145290-2	107	383	98	85
NM_001037814-2	110	251	88	57
NM_012327-3	102	285	17	26
NM_005163-3	412	812	246	137
NM_001244808-3	7	10	0	0
NM_005654-1	293	624	265	209
NM_052952-2	306	808	331	110
NM_198274-1	493	971	313	227
NM_001005184-1	225	492	204	74
NM_001835-2	45	16	8	0
NM_007276-3	76	159	71	42
NM_001278305-3	205	323	238	37
NM_006011-2	10	15	4	37
NM_001169126-2	575	917	714	305
NM_000042-3	150	305	167	135
NM_003895-2	50	138	55	80
NM_001278535-1	86	228	68	26
NM_145040-3	96	343	72	5
NM_133475-3	122	257	72	34
NM_001184699-2	112	342	148	81
NM_001444-3	231	714	158	258
NM_001252339-1	410	965	529	244
NM_001099219-1	722	1530	1149	370
NM_001363-3	183	388	106	27
NM_001252122-1	294	801	143	89
NM_000244-2	577	1301	548	464
NM_053279-1	151	284	297	92
NM_000981-1	255	604	192	238
NM_173525-2	800	1674	882	887
NM_006083-2	289	584	318	217
NM_001144062-2	97	306	76	168
NM_175056-1	249	487	224	128
NM_016131-1	75	177	80	125
NM_001144958-1	131	285	97	180
NM_001163561-1	300	871	178	135
NM_001258316-2	217	363	200	129
NM_001284331-3	78	269	83	13
NM_004139-1	456	986	455	254
NM_001145418-1	25	117	19	0
NM_001077181-3	118	230	94	77
NM_001198529-1	124	412	161	45
NM_001277176-1	310	649	308	163
NM_015978-2	193	343	86	72
NM_020124-3	275	430	341	180
NM_001279350-1	493	1147	580	206
NM_001004333-2	111	355	53	78
NM_001100600-2	98	162	91	117
NM_002751-1	145	264	92	131
NM_001033560-3	626	1337	664	468
NM_001008566-1	207	405	121	119
NM_019896-2	306	834	250	72
NM_001135690-3	101	472	55	129
NM_001288656-3	257	508	318	93
NM_001198989-1	88	174	89	53
NM_001013579-3	88	76	121	26
NM_001258282-3	207	406	155	127
NM_182761-2	113	312	144	131
NM_001191054-2	116	368	86	90
NM_001253729-1	133	288	139	49
NM_001039213-1	306	717	189	101
NM_002503-3	211	306	218	111
NM_001115152-1	129	253	8	92
NM_001204090-1	496	1180	448	289
NM_024061-2	126	481	142	209
NM_144974-1	34	63	33	21
NM_032182-2	164	497	156	78
NM_001286456-1	233	773	352	296
NM_020865-3	92	185	187	105
NM_001271702-1	176	238	151	68
NM_004423-3	198	489	120	93
NM_001099411-1	199	431	104	75
NM_001039675-2	95	247	124	131
NM_052966-3	551	1186	520	309
NM_001128303-2	152	224	110	131
NM_001195131-3	236	469	273	121
NM_001256879-1	191	590	178	148
NM_178342-1	108	270	46	50
NM_002865-2	45	51	36	31
NM_001204401-3	140	284	35	33
NM_001031680-1	99	338	162	138
NM_001204300-3	168	355	55	30
NM_145004-2	149	439	162	4
NM_024576-1	173	755	178	78
NM_001261448-1	206	368	113	146
NM_024031-1	74	149	60	81
NM_001172667-2	386	949	454	276
NM_021144-1	223	604	413	98
NM_000942-3	199	367	86	28
NM_007265-3	376	697	351	169
NM_001195684-3	199	362	208	175
NM_015395-2	168	426	253	162
NM_001199862-2	111	402	171	16
NM_007115-2	327	859	288	295
NM_181889-1	267	545	375	152
NM_001168360-1	138	373	99	35
NM_001278213-2	309	592	301	156
NM_001017922-2	116	187	122	14
NM_001122740-2	203	396	138	98
NM_015252-1	105	239	136	44
NM_005306-1	306	672	374	226
NM_005503-1	57	71	32	23
NM_207440-2	262	554	127	79
NM_005148-2	206	512	286	190
NM_002492-2	258	631	249	214
NM_001042406-3	471	769	269	166
NM_001039999-2	264	534	176	198
NM_007362-3	153	244	61	46
NM_001160277-2	125	259	46	89
NM_004444-2	232	501	206	157
NM_002999-2	337	548	159	222
NM_001076675-1	74	287	63	67
NM_001291284-2	148	423	157	67
NM_153259-3	146	352	182	119
NM_001159522-2	333	794	226	214
NM_000737-1	3	23	2	1
NM_002112-2	93	304	175	24
NM_002408-1	295	598	162	225
NM_001193483-2	251	444	129	118
NM_013271-1	123	290	80	12
NM_001242713-2	349	653	339	374
NM_175061-3	48	177	27	32
NM_001005404-2	230	510	74	107
NM_001293-2	49	199	79	86
NM_014774-3	221	404	103	22
NM_002443-3	166	423	163	68
NM_017753-3	421	980	359	297
NM_001715-2	226	607	259	76
NM_001282564-2	283	636	236	113
NM_001166252-1	167	397	157	109
NM_175884-2	247	629	225	233
NM_001048172-2	396	795	523	267
NM_001281717-1	123	272	109	51
NM_017872-1	308	859	299	212
NM_003407-3	101	157	166	61
NM_001130528-3	179	294	209	106
NM_001142393-3	177	311	146	57
NM_025008-3	54	246	17	60
NM_001004745-3	259	610	202	156
NM_018484-3	266	486	184	119
NM_001191323-2	247	410	282	102
NM_020927-2	150	534	119	17
NM_152554-1	217	706	135	123
NM_133372-1	109	411	110	19
NM_015527-1	72	221	108	20
NM_005093-3	101	137	44	39
NM_005232-3	311	702	319	185
NM_001289910-2	465	878	312	273
NM_001008223-3	57	83	67	31
NM_002944-1	362	639	209	170
NM_001257392-1	121	172	52	33
NM_006346-3	195	280	187	7
NM_001256704-2	138	270	142	165
NM_015027-1	166	356	112	13
NM_005544-1	290	846	207	197
NM_024032-2	207	339	222	107
NM_001288772-3	211	678	316	67
NM_021228-2	158	293	126	21
NM_000088-2	49	158	72	14
NM_001070-2	122	380	190	79
NM_024791-3	132	593	87	179
NM_178509-1	453	1032	450	378
NM_001164417-1	1120	2706	1412	874
NM_006729-1	219	592	254	197
NM_001284247-2	138	324	131	61
NM_001258453-3	107	281	131	32
NM_002714-3	29	76	40	0
NM_001077624-1	50	117	36	8
NM_173089-3	147	454	210	91
NM_022124-3	58	176	44	41
NM_001077500-1	110	583	213	107
NM_002693-2	99	160	139	129
NM_003498-1	64	80	17	18
NM_001142319-1	137	224	75	1
NM_001282675-2	604	1328	495	350
NM_001142333-2	87	123	56	24
NM_177456-3	184	333	176	135
NM_001143976-1	181	613	318	130
NM_001284341-1	311	379	197	189
NM_002787-2	483	939	621	225
NM_014345-1	71	355	56	75
NM_144577-2	365	614	282	142
NM_001004317-1	145	315	169	127
NM_001141945-2	73	176	51	64
NM_001014839-1	334	820	397	254
NM_007191-1	183	485	180	207
NM_153461-2	203	518	312	42
NM_080914-1	148	292	106	54
NM_001256484-2	78	261	97	5
NM_001081686-3	166	209	180	107
NM_001164459-2	421	748	249	140
NM_080616-2	39	143	62	7
NM_004645-3	61	192	7	40
NM_033084-3	273	526	243	37
NM_022916-2	115	293	138	23
NM_080913-1	511	797	298	359
NM_007008-1	1154	2374	971	622
NM_001113228-3	140	288	67	25
NM_001039803-1	113	343	87	23
NM_030808-2	211	621	209	175
NM_001130050-2	770	1350	992	469
NM_001031713-2	77	163	76	101
NM_001199922-1	169	327	71	31
NM_001286766-3	486	971	516	320
NM_000484-3	258	405	128	56
NM_181535-3	216	605	322	128
NM_024684-3	181	564	209	124
NM_005683-2	80	134	161	41
NM_003015-2	321	446	174	20
NM_001130677-3	21	120	100	2
NM_024031-2	171	142	75	48
NM_004963-1	581	1269	484	309
NM_016628-3	73	53	1	0
NM_133450-2	146	437	112	102
NM_001170751-1	103	248	74	35
NM_174976-2	188	423	389	94
NM_005391-2	73	344	93	8
NM_001199707-1	103	256	122	179
NM_002972-1	144	228	127	95
NM_024102-3	380	1068	239	253
NM_001135211-1	43	70	82	6
NM_001065-3	285	693	227	231
NM_032144-3	148	253	149	42
NM_138693-1	317	726	95	120
NM_001127358-3	206	848	203	263
NM_002921-3	632	1602	383	314
NM_005378-1	187	359	47	23
NM_003546-1	373	927	323	254
NM_001193425-1	115	414	154	83
NM_001645-3	149	250	40	38
NM_001029883-1	613	1397	584	312
NM_001254759-2	111	83	149	6
NM_005448-3	344	940	419	174
NM_001242336-3	81	153	19	7
NM_001270453-1	55	140	20	27
NM_002513-1	138	340	88	58
NM_001025077-1	279	748	318	168
NM_002957-3	51	217	54	0
NM_001134407-1	96	314	109	68
NM_001143942-1	79	296	90	169
NM_014623-3	68	211	115	18
NM_001198786-3	58	120	155	34
NM_013347-2	127	366	218	140
NM_207629-1	433	921	477	241
NM_001040411-1	103	258	122	17
NM_001198899-2	264	533	185	149
NM_001185022-1	206	517	186	81
NM_001050-2	222	374	157	85
NM_001282680-2	82	315	121	57
NM_015012-1	79	305	99	57
NM_080743-2	209	244	201	105
NM_000456-2	265	715	336	79
NM_002387-3	161	513	319	157
NM_001098805-3	683	1352	1012	365
NM_080616-3	143	121	87	46
NM_001163279-1	116	311	100	101
NM_000354-3	147	173	117	138
NM_002922-3	199	575	216	109
NM_032518-2	407	638	173	277
NM_001332-1	196	366	70	19
NM_138999-2	240	648	217	74
NM_001164384-3	185	350	100	31
NM_019034-2	65	154	116	155
NM_000250-3	98	365	103	66
NM_000087-1	487	934	192	223
NM_001130820-2	356	800	380	156
NM_014211-1	206	702	386	211
NM_005175-1	126	183	48	9
NM_003941-1	82	156	28	29
NM_014890-2	120	134	112	9
NM_019071-3	281	374	192	3
NM_005121-1	39	148	91	24
NM_001100-2	38	340	30	5
NM_080413-2	66	159	44	30
NM_133492-3	104	309	55	76
NM_001098540-1	714	1622	641	675
NM_001257342-3	275	521	255	182
NM_017867-2	182	481	39	214
NM_153367-1	46	133	73	11
NM_006438-2	189	206	207	66
NM_014716-3	522	1105	263	321
NM_002808-1	174	529	163	10
NM_001282900-1	210	412	174	38
NM_022841-3	453	1063	569	185
NM_007271-2	374	735	316	188
NM_017653-2	433	742	298	260
NM_002516-3	36	68	18	5
NM_032681-3	429	790	164	225
NM_001288953-1	273	590	318	167
NM_018471-1	200	609	192	198
NM_001164276-1	88	285	152	52
NM_177540-2	314	796	453	196
NM_012399-3	181	584	158	125
NM_001512-3	276	429	320	210
NM_031445-3	70	174	99	108
NM_003614-2	125	309	53	71
NM_001198594-1	347	638	249	162
NM_003169-3	81	71	21	51
NM_014008-3	289	588	173	166
NM_001247987-2	90	269	122	134
NM_147203-3	212	626	255	122
NM_003469-2	172	574	79	46
NM_018088-3	77	136	61	47
NM_001344-1	149	427	131	97
NM_003827-2	230	552	384	128
NM_022107-1	77	286	144	68
NM_014461-1	218	623	128	166
NM_024681-2	362	728	378	122
NM_001135176-1	136	299	136	51
NM_005566-1	171	480	127	113
NM_001206626-3	228	399	210	110
NM_001253725-3	175	433	104	98
NM_001164346-1	59	179	106	51
NM_015131-1	64	108	47	74
NM_001100425-3	204	831	179	186
NM_001166400-3	275	745	312	199
NM_017972-2	177	484	174	112
NM_001290557-2	92	432	141	49
NM_001867-1	137	261	52	66
NM_001193520-1	308	830	345	205
NM_001142505-2	48	66	38	18
NM_001204266-3	74	231	88	95
NM_001017440-1	83	236	110	22
NM_001506-3	357	626	435	181
NM_000857-3	102	198	141	67
NM_003385-2	112	129	120	58
NM_130391-2	350	764	269	86
NM_001171093-1	140	181	130	119
NM_145004-1	144	333	158	47
NM_001008541-3	83	254	35	82
NM_001207076-2	203	390	149	87
NM_001082968-2	89	256	76	60
NM_000160-1	231	621	229	267
NM_001135047-3	243	464	177	145
NM_001256088-3	267	674	278	185
NM_139245-3	702	1804	694	468
NM_001288838-1	186	492	158	66
NM_006520-1	206	470	161	91
NM_001166417-3	87	155	28	9
NM_006746-1	277	647	339	80
NM_003086-2	107	414	171	51
NM_001258328-3	177	329	82	99
NM_000290-3	32	45	99	11
NM_012264-2	315	677	215	51
NM_152667-3	72	260	90	108
NM_001165945-1	60	199	67	26
NM_032222-2	59	181	34	26
NM_001142471-2	73	221	117	39
NM_198353-1	91	368	83	18
NM_001243597-2	167	236	228	39
NM_173475-2	260	441	353	158
NM_001251974-2	554	1254	662	371
NM_001199973-1	271	502	266	85
NM_006196-2	145	286	112	214
NM_001190764-3	118	255	151	66
NM_001714-1	118	406	202	37
NM_021738-1	295	751	222	231
NM_053006-2	93	320	70	91
NM_001278641-2	66	188	219	89
NM_001244992-2	109	130	189	77
NM_025137-3	187	422	140	102
NM_031439-1	158	231	118	34
NM_001113512-3	117	171	88	2
NM_001537-1	137	515	252	213
NM_001289024-2	299	682	253	128
NM_004944-3	114	170	71	48
NM_001243081-3	876	1659	589	504
NM_004345-3	195	519	182	121
NM_005910-3	134	270	153	35
NM_001288773-3	180	349	199	127
NM_001204375-3	64	231	14	25
NM_007068-2	160	440	124	79
NM_032017-3	157	456	257	146
NM_001127713-3	126	317	236	214
NM_005154-3	96	198	92	82
NM_005396-1	547	1050	644	242
NM_001007125-1	119	345	186	74
NM_181702-3	105	363	137	38
NM_024515-3	133	543	233	139
NM_004274-3	222	411	215	111
NM_014187-1	112	136	85	30
NM_001204255-3	105	249	247	38
NM_012394-3	106	368	67	91
NM_001193307-1	103	306	74	27
NM_016403-2	398	947	312	265
NM_001178140-3	34	238	92	34
NM_001290060-2	103	391	97	112
NM_001290056-1	272	527	249	168
NM_001164712-1	482	1096	440	323
NM_002667-1	216	508	122	78
NM_006669-3	406	1027	746	377
NM_001008-1	120	195	118	121
NM_173499-3	155	377	224	94
NM_001253852-2	96	262	63	123
NM_033064-2	244	1009	259	207
NM_080671-3	168	446	197	131
NM_017634-1	80	85	121	4
NM_007272-3	275	711	367	91
NM_003554-3	101	229	118	7
NM_014458-3	96	170	67	6
NM_002128-2	218	520	271	131
NM_014969-1	111	370	77	40
NM_004430-1	264	534	232	89
NM_004869-2	223	380	155	89
NM_018451-1	181	469	132	211
NM_199355-2	131	336	107	50
NM_012471-3	16	64	10	1
NM_000989-2	115	518	150	113
NM_004981-1	184	461	204	155
NM_182627-1	73	285	127	40
NM_001160372-1	64	140	48	32
NM_001018057-1	225	362	147	75
NM_019069-1	263	766	245	63
NM_005806-2	42	112	152	122
NM_001271044-3	88	162	101	54
NM_023070-2	262	435	219	318
NM_020660-1	62	96	25	0
NM_178443-1	202	412	98	65
NM_014805-3	183	299	140	93
NM_138712-3	265	555	270	100
NM_001080462-3	343	814	329	219
NM_014903-1	168	428	180	132
NM_018174-1	98	197	93	24
NM_001256099-1	111	143	113	39
NM_001080415-1	257	520	178	151
NM_182810-1	640	1378	368	267
NM_016044-2	168	502	215	94
NM_032631-3	131	206	75	13
NM_001242764-3	236	331	149	119
NM_001277075-2	178	388	140	222
NM_024307-3	520	1125	583	457
NM_203301-2	126	145	64	7
NM_025157-1	134	349	108	51
NM_004855-2	288	437	146	96
NM_017684-1	307	553	432	194
NM_004381-3	226	710	193	175
NM_001193552-3	122	257	63	40
NM_001039958-2	548	945	517	258
NM_001024943-2	143	299	111	89
NM_001193583-1	54	97	21	41
NM_004577-3	115	221	208	30
NM_001271852-2	249	491	254	221
NM_001142305-2	156	428	187	33
NM_001165947-3	292	696	348	122
NM_001146699-2	104	83	68	36
NM_001204527-1	51	179	32	10
NM_001123040-2	171	545	202	122
NM_001161443-3	237	595	155	93
NM_001199978-1	165	161	150	36
NM_014376-3	28	42	63	2
NM_017816-3	97	208	64	20
NM_001244963-1	158	335	228	57
NM_003435-3	169	324	189	161
NM_004412-2	319	667	238	209
NM_016656-2	302	736	348	317
NM_015450-3	108	151	106	119
NM_153436-1	94	249	128	114
NM_024045-2	271	559	264	203
NM_032289-2	149	266	52	20
NM_002480-2	69	159	102	39
NM_006615-1	129	281	93	38
NM_001198830-2	396	763	414	242
NM_015559-2	74	178	64	85
NM_001122-3	110	359	211	71
NM_004975-1	59	66	31	3
NM_001135730-3	139	372	172	12
NM_000330-2	191	426	165	86
NM_017761-1	191	396	192	117
NM_005089-2	92	258	37	43
NM_001242307-2	169	273	181	108
NM_020650-3	86	265	133	11
NM_001164283-3	341	904	334	325
NM_001024215-1	481	1112	520	199
NM_005053-3	200	388	236	196
NM_001143687-2	29	56	81	112
NM_033280-2	150	448	164	100
NM_001204344-1	241	412	208	148
NM_173469-3	125	340	123	30
NM_001286580-1	58	200	54	72
NM_138389-1	141	246	34	102
NM_001258452-2	159	341	144	116
NM_033188-1	293	791	385	194
NM_001278649-3	37	70	87	53
NM_000493-2	368	768	285	165
NM_007266-1	184	265	141	130
NM_194278-2	202	469	316	141
NM_033184-1	186	591	322	166
NM_001013627-2	43	58	0	18
NM_080725-1	249	523	73	107
NM_013242-3	101	211	94	29
NM_017840-1	549	1317	380	187
NM_005604-3	29	76	44	34
NM_031960-1	414	881	247	246
NM_000923-3	229	392	215	113
NM_153247-1	113	211	130	27
NM_022843-3	311	793	167	222
NM_006358-3	179	496	179	137
NM_005420-3	111	206	318	26
NM_020169-1	172	515	216	150
NM_001129993-2	59	202	65	70
NM_001628-2	183	530	222	132
NM_003620-1	221	364	90	112
NM_199342-1	105	152	45	56
NM_025112-3	32	94	54	19
NM_001161012-1	319	763	370	329
NM_001256269-2	294	528	189	356
NM_001100391-1	150	366	197	145
NM_019554-2	55	215	78	89
NM_182566-3	111	165	57	58
NM_006763-2	99	243	76	93
NM_001113475-3	285	665	252	108
NM_001024401-2	240	628	253	156
NM_001252036-2	77	253	66	55
NM_001042682-3	50	100	0	1
NM_001190478-1	258	610	159	259
NM_001204517-2	451	852	369	217
NM_000844-3	147	378	185	71
NM_001024630-1	136	138	35	13
NM_001282914-3	58	130	49	20
NM_174910-1	111	170	36	25
NM_004699-2	95	378	146	77
NM_001131015-3	109	301	129	68
NM_012139-3	40	156	82	28
NM_001101672-2	117	243	147	110
NM_001012337-3	201	362	140	51
NM_178813-1	245	612	401	115
NM_004778-3	180	223	134	86
NM_016027-1	192	693	281	264
NM_001174150-3	128	257	193	28
NM_001258346-3	220	335	225	125
NM_145000-2	113	286	62	36
NM_024947-3	259	416	306	82
NM_001114184-3	139	396	78	65
NM_006244-3	104	463	183	99
NM_133172-2	94	312	87	145
NM_001110354-1	415	831	472	368
NM_017826-3	126	279	107	90
NM_001193571-1	162	304	209	45
NM_001005245-2	243	771	190	174
NM_004561-3	157	614	99	134
NM_001287810-3	107	341	48	40
NM_032305-3	211	499	193	164
NM_017957-3	71	146	54	0
NM_001195076-2	97	251	53	42
NM_001114635-3	29	101	26	4
NM_001288765-2	78	131	67	74
NM_014777-2	92	124	69	11
NM_015705-1	73	238	113	58
NM_004923-3	470	1168	475	298
NM_014979-3	76	267	57	137
NM_001004303-1	414	925	416	331
NM_001130036-1	293	408	141	203
NM_001039479-3	125	296	81	88
NM_005623-3	145	263	59	40
NM_018916-3	281	557	320	191
NM_014827-2	84	274	92	42
NM_003580-3	124	245	173	98
NM_001126123-3	83	164	158	66
NM_001143936-3	73	125	56	0
NM_014565-3	208	479	304	159
NM_001278320-2	151	363	224	121
NM_201383-3	182	480	253	63
NM_001177948-2	113	186	96	35
NM_004200-3	47	224	82	40
NM_003813-2	145	402	202	171
NM_001389-2	189	497	145	161
NM_018048-3	218	465	264	201
NM_001099222-3	89	316	57	42
NM_080817-2	310	898	244	123
NM_001080406-1	209	376	242	40
NM_001276254-1	323	612	358	210
NM_006885-3	124	432	79	62
NM_001256134-1	548	1337	546	524
NM_001172105-2	116	276	115	123
NM_014747-2	76	215	44	2
NM_001284207-3	77	202	47	92
NM_001284526-1	419	723	174	300
NM_024680-3	138	259	68	66
NM_001166340-3	282	660	162	157
NM_001271749-2	108	225	67	56
NM_001191321-2	59	132	11	41
NM_005389-2	100	135	101	32
NM_005396-3	331	967	329	183
NM_002353-1	242	650	236	130
NM_001085420-3	34	89	26	2
NM_001202475-1	183	483	208	184
NM_001165967-2	118	231	141	68
NM_020781-1	317	715	167	117
NM_001005469-1	169	466	125	194
NM_001190899-1	601	1293	712	333
NM_022090-1	260	647	311	153
NM_001278610-1	50	121	16	0
NM_000177-2	184	829	179	135
NM_016213-1	64	276	63	102
NM_000628-3	154	226	72	155
NM_001290331-3	179	468	197	38
NM_024104-1	213	528	169	123
NM_001256163-2	86	248	64	75
NM_001983-3	148	206	75	57
NM_005471-2	98	316	157	122
NM_001001890-3	275	540	188	183
NM_001004688-3	316	546	227	99
NM_013270-1	86	284	83	84
NM_001135241-3	222	462	365	146
NM_182501-1	272	510	244	101
NM_175078-2	136	353	112	19
NM_001031804-1	196	408	40	97
NM_001281469-3	181	450	83	16
NM_205847-2	116	270	40	56
NM_023035-2	243	684	203	112
NM_001080509-2	206	452	252	63
NM_001701-2	703	1458	563	382
NM_006477-1	214	446	84	70
NM_001264-1	107	195	44	53
NM_005036-1	79	171	110	45
NM_001173517-2	184	453	163	177
NM_032289-3	52	104	6	12
NM_198479-3	160	350	163	141
NM_001278314-2	413	1192	289	278
NM_033126-1	148	427	204	251
NM_001260477-1	86	148	80	13
NM_001161364-2	246	384	178	129
NM_020461-1	148	435	114	67
NM_001937-3	170	647	195	113
NM_172159-1	415	740	258	224
NM_001161331-3	96	199	113	56
NM_001643-1	169	431	79	146
NM_031468-1	230	404	88	64
NM_001129742-1	84	104	11	100
NM_020897-3	183	615	236	134
NM_021191-3	163	269	53	189
NM_002185-1	80	175	105	18
NM_021637-3	142	292	197	106
NM_014803-3	229	357	169	142
NM_203424-2	93	156	89	11
NM_001166533-3	74	133	86	8
NM_018230-2	45	149	104	1
NM_173080-1	230	553	179	98
NM_001080497-2	157	283	27	37
NM_138981-2	218	344	259	52
NM_001199803-3	363	695	371	186
NM_033026-1	95	248	107	88
NM_017432-1	214	674	348	155
NM_014288-1	173	399	162	22
NM_001127718-3	139	360	259	126
NM_001014763-1	137	277	136	110
NM_015441-2	87	263	53	56
NM_002037-1	42	180	50	24
NM_001361-3	123	244	134	114
NM_024835-1	105	283	97	8
NM_001135-3	108	114	95	44
NM_001005169-3	223	403	155	96
NM_018064-1	274	727	447	160
NM_001012659-1	130	153	82	63
NM_021238-2	214	520	135	93
NM_001270805-1	63	149	90	35
NM_001085455-3	131	333	237	114
NM_020348-2	451	1003	301	217
NM_002859-3	222	566	256	24
NM_015032-3	71	174	31	33
NM_003426-2	76	249	89	20
NM_001288575-2	1054	2347	864	420
NM_015231-2	77	173	60	18
NM_006900-3	139	423	95	53
NM_004610-2	289	520	155	60
NM_001136505-2	219	486	121	102
NM_003478-2	114	291	17	13
NM_002202-2	108	209	60	42
NM_032995-1	200	403	274	134
NM_001692-2	192	427	207	57
NM_001282916-2	32	36	31	3
NM_001177317-3	92	339	30	113
NM_025015-1	57	200	20	0
NM_153027-1	165	408	227	150
NM_024523-2	63	114	16	27
NM_001077427-1	508	896	466	274
NM_178429-1	141	462	69	216
NM_002581-3	90	229	56	37
NM_003047-2	256	897	193	190
NM_000773-2	77	189	49	49
NM_001167670-1	265	526	84	104
NM_001145450-1	416	678	469	305
NM_001172663-2	139	540	207	86
NM_001127668-3	139	205	106	40
NM_012100-3	57	133	113	55
NM_001256071-1	54	205	48	1
NM_001285900-3	363	708	391	180
NM_001206977-3	178	423	171	130
NM_003151-3	105	242	139	60
NM_016531-1	70	74	58	20
NM_015370-2	437	756	401	218
NM_080632-3	62	64	54	12
NM_145036-1	246	691	256	250
NM_025195-3	55	142	87	3
NM_005744-3	108	301	87	114
NM_174878-1	359	740	226	197
NM_198563-2	102	177	188	32
NM_000612-1	102	310	50	75
NM_152744-3	42	35	46	0
NM_001178033-2	140	224	133	11
NM_001136566-3	226	461	285	79
NM_006453-1	98	129	77	32
NM_144662-3	407	699	403	254
NM_001257101-3	65	323	19	29
NM_001282322-1	219	408	148	126
NM_052965-1	121	420	211	99
NM_014173-3	328	598	288	103
NM_001202483-3	193	541	202	180
NM_014477-3	211	483	260	284
NM_012181-2	44	97	22	49
NM_001143989-1	454	1077	572	274
NM_201544-2	163	490	200	206
NM_002127-1	123	319	187	55
NM_018296-1	92	266	33	38
NM_022821-2	576	983	280	469
NM_152736-2	217	340	58	56
NM_001278098-1	116	321	90	93
NM_006423-1	247	688	241	107
NM_005533-2	223	348	159	57
NM_201439-3	172	401	151	125
NM_001130033-3	120	336	119	68
NM_001256708-1	158	300	62	120
NM_207330-1	97	239	153	29
NM_003579-3	104	145	110	96
NM_013447-2	200	581	249	40
NM_001127174-2	190	308	154	36
NM_033020-1	55	107	161	22
NM_001112718-3	134	268	142	7
NM_017860-3	80	230	117	2
NM_001130448-2	114	342	159	145
NM_199242-2	329	679	435	295
NM_015987-1	83	162	29	67
NM_001099407-3	106	363	93	111
NM_005160-3	53	193	79	44
NM_147191-3	228	620	161	82
NM_012373-1	178	321	215	141
NM_001632-3	175	368	152	20
NM_001102454-3	454	1315	405	467
NM_001199570-1	114	414	269	136
NM_032119-2	119	284	37	65
NM_001099755-2	246	670	79	156
NM_021227-3	116	163	22	31
NM_172168-1	417	1004	478	92
NM_001001670-1	317	751	160	89
NM_018254-3	76	213	55	58
NM_032315-3	133	115	91	64
NM_020196-1	118	302	46	23
NM_001278716-1	183	494	130	66
NM_001177355-3	386	898	429	247
NM_006240-2	205	366	125	74
NM_001287001-1	494	1215	580	200
NM_001012455-3	349	600	467	165
NM_006258-3	70	180	18	0
NM_014878-1	314	462	188	113
NM_001191060-1	169	293	197	254
NM_001165964-3	128	310	113	72
NM_002149-2	343	810	307	115
NM_198722-1	306	797	228	221
NM_058169-1	196	436	139	52
NM_024902-2	366	721	268	248
NM_001100600-3	166	242	142	188
NM_000178-2	78	213	113	0
NM_024104-2	240	397	208	72
NM_000417-1	187	404	124	87
NM_014723-2	139	487	192	124
NM_012090-2	189	464	187	75
NM_016037-1	162	370	134	229
NM_014719-2	192	433	166	40
NM_032862-3	98	150	22	5
NM_001143962-2	118	203	194	120
NM_022169-2	138	262	149	49
NM_001098208-1	113	273	96	104
NM_001170635-3	90	255	153	163
NM_001202521-3	313	710	200	194
NM_001195578-1	549	1483	422	301
NM_001122835-1	48	97	70	3
NM_194439-2	217	529	174	177
NM_005125-2	126	364	359	69
NM_012420-1	88	177	92	21
NM_020769-2	237	479	148	131
NM_145665-1	616	1330	640	331
NM_198180-2	135	480	168	8
NM_031422-2	477	928	763	211
NM_030636-3	219	230	196	121
NM_033060-2	185	460	386	148
NM_015002-2	134	198	119	87
NM_002337-3	112	265	167	103
NM_005697-2	44	179	14	129
NM_020932-1	109	302	122	32
NM_015898-1	97	253	64	22
NM_148964-2	230	604	99	173
NM_016633-2	246	398	52	170
NM_174921-2	85	169	58	55
NM_015331-2	261	427	216	88
NM_078471-3	142	194	291	75
NM_197960-2	235	508	327	48
NM_152334-3	97	244	232	37
NM_001127217-2	97	262	15	20
NM_145288-3	87	218	62	43
NM_001105569-1	98	192	60	23
NM_012288-1	71	224	145	126
NM_001286457-2	309	771	393	166
NM_001285486-2	85	178	107	55
NM_001020-1	298	530	204	139
NM_139121-3	113	232	237	42
NM_001168278-2	295	622	309	167
NM_001202550-3	106	309	144	83
NM_176813-2	212	599	180	217
NM_001178045-1	263	427	167	206
NM_017578-3	284	560	227	51
NM_014012-3	51	186	28	71
NM_001059-2	202	445	158	129
NM_000351-3	126	342	83	38
NM_025059-1	244	371	226	102
NM_018004-2	83	122	48	45
NM_144586-2	25	91	48	1
NM_001159767-1	86	160	100	27
NM_001258310-2	72	93	93	31
NM_001135602-1	261	529	289	107
NM_014467-3	99	120	43	48
NM_022097-1	145	374	156	97
NM_007158-1	366	880	443	362
NM_001134321-1	134	398	147	26
NM_001145642-3	78	251	4	28
NM_053004-3	184	498	239	190
NM_001005187-1	155	328	48	111
NM_001168389-1	56	190	62	42
NM_001098808-1	221	523	144	165
NM_020807-3	313	825	289	233
NM_001193532-1	105	224	267	185
NM_002898-2	359	757	481	198
NM_002937-1	219	688	341	79
NM_018538-3	138	407	108	96
NM_018063-3	132	272	168	68
NM_080740-2	237	581	239	122
NM_170665-3	96	216	94	13
NM_032367-2	176	312	115	161
NM_001001349-3	133	405	204	81
NM_182796-2	526	1380	311	224
NM_152736-3	227	849	231	128
NM_005149-1	201	351	110	182
NM_031935-3	31	178	59	25
NM_017666-3	365	780	204	237
NM_001172654-1	72	210	92	15
NM_016396-1	100	105	17	22
NM_001282117-1	375	814	257	293
NM_173814-3	81	175	24	50
NM_030980-2	254	445	188	212
NM_144683-3	256	448	283	86
NM_003006-1	704	1604	827	244
NM_001127183-3	346	1024	365	234
NM_018390-2	326	675	394	141
NM_001242806-2	139	322	170	82
NM_006411-3	95	224	89	36
NM_173614-3	181	544	355	250
NM_003621-3	85	243	87	7
NM_014364-2	277	437	230	189
NM_138769-2	108	312	172	147
NM_001144876-1	195	456	187	104
NM_001160331-3	85	212	7	13
NM_014820-2	85	93	21	21
NM_001122961-2	69	130	67	15
NM_173664-3	153	457	163	53
NM_001085372-2	72	72	79	26
NM_003607-3	104	237	140	123
NM_001272068-1	150	243	121	88
NM_001204212-2	94	185	87	4
NM_032687-3	40	258	49	61
NM_181847-1	86	342	96	46
NM_001130997-1	215	541	184	147
NM_017780-1	639	1429	351	332
NM_032135-1	302	677	237	160
NM_005597-1	33	106	66	1
NM_001287223-1	546	1203	428	284
NM_001242729-2	240	415	147	147
NM_006401-2	58	124	114	28
NM_001195260-2	421	681	395	249
NM_000350-3	209	912	199	204
NM_152795-1	183	341	260	120
NM_020928-3	179	419	215	24
NM_023937-3	271	639	185	227
NM_177991-2	328	677	346	169
NM_145115-2	104	422	93	91
NM_001658-2	67	162	52	81
NM_001080468-1	593	1141	604	328
NM_080617-3	302	563	413	158
NM_174905-1	205	378	102	60
NM_001281735-1	186	489	165	56
NM_004832-2	267	613	439	129
NM_016649-3	192	597	365	227
NM_019093-1	152	311	119	135
NM_001256613-1	158	429	138	70
NM_001018057-3	183	546	107	135
NM_024702-3	121	264	115	86
NM_001105565-1	154	329	335	47
NM_001010940-3	323	641	334	285
NM_001007237-1	59	235	19	80
NM_001286276-1	201	413	125	143
NM_032492-1	236	720	341	178
NM_014668-2	142	411	80	111
NM_007241-1	299	535	121	170
NM_001013845-1	110	402	85	179
NM_182522-3	10	96	6	1
NM_012461-2	154	341	144	89
NM_000712-2	172	375	143	38
NM_001037161-1	104	171	67	18
NM_001818-2	112	274	95	53
NM_001145165-3	337	709	245	297
NM_001124-3	280	549	278	212
NM_182640-1	92	277	113	14
NM_001190457-1	79	168	210	103
NM_024759-1	209	797	109	103
NM_001278568-3	558	1398	730	371
NM_003044-1	75	261	108	151
NM_017774-1	350	587	280	144
NM_001271088-2	165	375	72	69
NM_004662-2	186	488	178	121
NM_022351-2	72	200	74	31
NM_033386-2	40	148	126	0
NM_020830-2	178	337	83	40
NM_003648-2	125	264	196	57
NM_001243169-3	158	318	102	64
NM_033251-3	227	564	194	217
NM_004168-2	261	605	229	128
NM_001172779-1	70	176	40	112
NM_001288804-1	502	1056	322	216
NM_001204459-2	259	550	212	151
NM_000239-1	439	1198	328	165
NM_002446-3	43	176	169	1
NM_001282162-3	328	648	192	148
NM_001207062-1	109	345	93	9
NM_012385-2	340	702	615	246
NM_024527-2	70	191	100	61
NM_018418-3	102	179	114	96
NM_001198986-1	135	368	80	57
NM_003036-1	25	62	36	13
NM_016167-3	99	123	89	72
NM_138463-3	55	124	23	78
NM_001172828-1	175	327	82	83
NM_138358-1	132	311	178	192
NM_001085487-1	195	400	229	90
NM_001039467-2	20	41	9	31
NM_005833-1	67	179	33	0
NM_003690-1	82	159	61	49
NM_052862-3	40	200	50	25
NM_001193312-2	138	443	222	46
NM_002964-1	94	273	63	62
NM_001271539-3	167	423	125	106
NM_001242804-2	179	224	186	89
NM_022377-3	75	83	89	94
NM_000430-1	227	691	165	132
NM_001010889-2	1353	2946	962	745
NM_001080441-3	116	234	88	89
NM_004076-1	158	328	115	87
NM_004753-2	356	855	200	279
NM_001004352-3	134	213	113	10
NM_014142-3	367	539	347	124
NM_006930-2	69	259	50	20
NM_002754-1	23	80	74	2
NM_003551-3	868	1869	620	454
NM_001285461-3	343	959	271	145
NM_153377-2	77	145	20	65
NM_001242790-3	224	603	206	192
NM_005824-1	420	937	266	245
NM_012340-1	29	87	54	24
NM_001130440-1	147	301	213	98
NM_001288731-1	447	994	366	270
NM_017665-1	237	607	174	91
NM_001242804-1	258	701	145	68
NM_001085398-1	313	732	286	149
NM_001013415-3	125	524	65	103
NM_153026-2	55	108	12	41
NM_007350-1	318	569	215	221
NM_004074-2	200	377	202	162
NM_001042551-2	121	235	81	19
NM_003345-3	91	115	38	72
NM_005319-1	200	327	150	120
NM_020147-3	172	297	271	115
NM_001290009-3	197	331	101	63
NM_001142651-3	171	225	97	99
NM_001160148-3	236	776	300	293
NM_005252-1	150	375	206	106
NM_001145286-2	74	112	20	33
NM_001033555-2	87	466	29	182
NM_024301-1	179	301	93	62
NM_017919-2	203	734	164	60
NM_145307-3	131	314	145	16
NM_153255-2	247	694	138	150
NM_003830-1	113	356	90	174
NM_001083111-3	172	423	158	61
NM_024599-1	275	551	192	274
NM_001173466-1	186	449	130	98
NM_032314-1	358	668	270	125
NM_005780-3	77	138	54	39
NM_001258456-3	237	665	283	129
NM_031216-2	118	290	141	60
NM_005793-3	295	925	262	180
NM_153608-3	514	1370	670	189
NM_012483-3	151	360	117	65
NM_019104-3	80	295	109	47
NM_001113561-1	66	192	41	6
NM_013362-2	118	215	125	35
NM_001080543-3	53	69	51	116
NM_002642-1	66	504	105	47
NM_016546-1	191	549	256	264
NM_003779-2	389	596	567	201
NM_002622-2	533	1053	344	160
NM_001098815-1	218	432	170	105
NM_001161330-2	140	216	145	67
NM_152384-3	963	2403	1285	890
NM_001170760-2	332	647	202	178
NM_001005183-3	68	113	52	46
NM_000696-1	190	335	147	137
NM_019103-1	66	157	59	51
NM_176810-2	136	261	64	31
NM_022072-1	152	334	160	175
NM_021947-1	96	128	26	37
NM_023925-3	93	120	101	32
NM_019060-1	183	196	63	65
NM_001146345-2	81	208	117	31
NM_002447-3	65	116	28	27
NM_002360-2	45	148	68	56
NM_198585-1	149	112	103	117
NM_145065-2	182	448	129	68
NM_001004323-3	121	268	118	126
NM_001007471-2	119	248	129	25
NM_020117-1	142	293	72	4
NM_001257174-3	158	574	248	113
NM_001174101-2	81	208	70	40
NM_004197-3	701	1530	549	573
NM_001268284-3	328	895	278	177
NM_022899-1	159	273	77	63
NM_001018008-1	234	327	198	183
NM_005501-2	57	71	33	1
NM_003851-1	243	495	389	198
NM_001077349-2	185	404	190	113
NM_001142473-1	179	400	52	87
NM_172159-3	141	387	115	99
NM_014000-1	200	321	142	31
NM_006392-3	81	234	87	62
NM_003318-3	174	428	176	48
NM_001205271-1	213	540	284	152
NM_198317-2	520	1428	461	339
NM_016545-1	184	521	107	201
NM_006059-3	126	339	250	86
NM_001199760-3	337	773	342	328
NM_020738-3	68	301	71	14
NM_001171660-3	435	1137	442	348
NM_145274-2	221	445	167	164
NM_001145108-2	71	129	97	30
NM_001004431-1	74	178	17	26
NM_152888-2	25	106	71	23
NM_002283-2	746	1508	538	601
NM_203464-2	65	166	171	18
NM_001277285-3	63	80	73	46
NM_013361-1	155	191	38	117
NM_024620-3	264	726	192	163
NM_079420-2	63	104	17	32
NM_001042376-3	87	362	85	29
NM_001171613-3	300	464	327	185
NM_004074-1	131	224	150	72
NM_024933-1	359	983	280	305
NM_015171-2	65	277	85	53
NM_016327-2	230	371	252	123
NM_025240-2	63	155	72	47
NM_018441-2	172	349	123	94
NM_001134285-2	128	264	149	172
NM_032488-2	145	221	167	44
NM_004619-3	366	667	300	98
NM_152902-1	617	1284	736	217
NM_005460-3	83	154	207	43
NM_018031-2	79	220	129	112
NM_016607-2	262	666	255	244
NM_017510-3	55	180	65	22
NM_004429-3	55	124	9	12
NM_080657-2	334	747	389	285
NM_001136113-1	180	613	238	77
NM_002314-3	57	202	96	60
NM_005031-2	120	356	65	35
NM_175040-3	32	49	42	33
NM_001242488-2	117	293	21	57
NM_003705-3	175	307	191	34
NM_005656-3	169	277	172	58
NM_032635-2	101	303	102	41
NM_000987-1	111	344	103	85
NM_000328-1	234	731	306	149
NM_001242765-1	652	1387	613	277
NM_001190738-2	295	755	230	141
NM_007032-3	135	260	93	93
NM_153480-2	32	126	45	24
NM_001641-1	252	376	225	183
NM_001290007-3	133	379	36	39
NM_001277372-2	85	242	84	92
NM_001164688-2	511	851	371	203
NM_001282063-3	115	172	112	41
NM_001242374-2	123	407	153	166
NM_006372-3	803	1512	584	462
NM_148173-1	181	562	182	91
NM_001004304-2	86	207	26	32
NM_139072-3	76	144	50	28
NM_005446-2	169	492	108	59
NM_001516-3	136	166	119	51
NM_033450-3	282	629	271	141
NM_032572-3	268	670	368	163
NM_023067-1	241	460	98	44
NM_198443-3	76	141	168	46
NM_001145224-2	631	1041	523	216
NM_006816-3	133	401	137	153
NM_001286746-3	274	601	263	130
NM_181643-2	219	579	178	180
NM_006456-2	34	111	43	12
NM_153269-3	81	305	85	89
NM_133457-1	184	519	293	83
NM_014335-3	329	692	289	221
NM_001001921-2	244	457	293	173
NM_001557-3	75	181	62	54
NM_001201536-1	135	257	72	55
NM_001199012-2	205	485	170	118
NM_145644-1	242	498	182	146
NM_015849-2	280	881	219	204
NM_001270520-1	214	464	37	22
NM_013387-1	224	622	255	77
NM_002566-2	105	301	119	86
NM_001010860-2	385	842	152	89
NM_004539-1	165	307	98	52
NM_016173-1	62	260	43	71
NM_001727-3	259	495	419	144
NM_001281723-2	392	798	249	116
NM_030915-3	153	463	115	105
NM_012322-1	304	572	215	134
NM_001185117-3	163	188	162	95
NM_032180-3	20	41	3	50
NM_001009984-2	170	385	124	188
NM_001145319-1	185	323	105	73
NM_001004489-2	323	744	349	166
NM_001204284-1	438	965	281	199
NM_001128205-3	110	150	385	88
NM_015230-1	92	336	210	67
NM_203464-1	342	620	161	121
NM_001287349-2	40	135	37	24
NM_001163280-3	79	265	141	100
NM_000249-2	170	594	131	118
NM_022468-1	245	587	246	105
NM_014832-3	140	237	83	64
NM_053283-3	92	218	145	44
NM_001198851-1	166	262	84	56
NM_001195220-3	50	81	18	16
NM_153256-1	144	479	110	108
NM_001005474-1	108	305	115	38
NM_001915-3	40	81	85	95
NM_014419-1	375	538	348	273
NM_001270410-3	205	459	242	182
NM_004807-2	111	143	191	3
NM_000634-1	211	538	189	64
NM_015021-1	48	167	6	55
NM_002010-3	97	182	166	57
NM_001253875-2	413	857	263	357
NM_005625-3	182	550	224	74
NM_004040-3	172	419	74	104
NM_017446-1	28	94	65	73
NM_207510-3	293	527	447	170
NM_013314-2	327	854	303	308
NM_003724-2	108	297	79	41
NM_001416-1	235	685	394	280
NM_001004698-3	276	722	340	163
NM_152571-2	82	290	91	26
NM_001029880-2	125	249	179	42
NM_001040432-2	157	570	257	77
NM_053003-2	278	624	249	160
NM_002761-1	96	254	51	102
NM_012117-1	125	231	137	77
NM_001282866-3	206	518	204	89
NM_177550-1	81	287	184	93
NM_006855-1	102	178	102	12
NM_152475-2	72	169	100	56
NM_001289808-1	127	194	79	76
NM_002739-1	116	149	105	0
NM_005925-2	74	232	59	75
NM_001005323-1	300	566	314	253
NM_001166290-3	241	487	183	96
NM_001235-3	162	314	152	38
NM_003113-3	251	478	135	344
NM_001142964-2	154	464	169	123
NM_001256185-3	216	644	174	91
NM_005046-3	426	823	616	168
NM_031959-1	221	262	199	54
NM_001025253-2	196	495	180	93
NM_053042-3	140	253	115	42
NM_198407-3	94	207	48	13
NM_001077506-2	91	303	128	125
NM_001290-3	82	270	34	28
NM_001287429-2	142	366	24	77
NM_001006627-1	422	1024	636	251
NM_033114-3	101	284	39	31
NM_001163075-2	56	156	48	55
NM_001161819-2	123	301	89	62
NM_001031748-2	249	745	376	87
NM_182499-3	148	563	171	103
NM_001277353-2	109	353	171	164
[truncated: 68,298 more rows]
