# Supplementary material for: Gain-of-function genetic screens in human cells identify SLC transporters overcoming environmental nutrient restrictions
Source: Life Sci Alliance. 2022 Sep 16;5(11):e202201404. doi: 10.26508/lsa.202201404 (PMC9481932; doi:10.26508/lsa.202201404)
Supplement: Supplementary file 10 [file LSA-2022-01404_TableS10.xlsx]

## Sheet: Results µM
Report	Biocrates p180 kit
Sample Identification	Sample Description	Unit	C0	C2	C3	C3-DC (C4-OH)	C3-OH	C3:1	C4	C4:1	C5	C5-DC (C6-OH)	C5-M-DC	C5-OH (C3-DC-M)	C5:1	C5:1-DC	C6 (C4:1-DC)	C6:1	C7-DC	C8	C9	C10	C10:1	C10:2	C12	C12-DC	C12:1	C14	C14:1	C14:1-OH	C14:2	C14:2-OH	C16	C16-OH	C16:1	C16:1-OH	C16:2	C16:2-OH	C18	C18:1	C18:1-OH	C18:2	Ala	Arg	Asn	Asp	Cit	Gln	Glu
SLC7A3_25	Induction_0_normal_HEK WT-OE SLC7A3	µM	3.7	0.287	0.325	< LOD	< LOD	< LOD	0.595	< LOD	0.099	< LOD	< LOD	< LOD	< LOD	< LOD	< LOD	< LOD	< LOD	< LOD	< LOD	< LOD	< LOD	< LOD	< LOD	< LOD	< LOD	< LOD	< LOD	< LOD	< LOD	< LOD	< LOD	< LOD	< LOD	< LOD	< LOD	< LOD	< LOD	0.015	< LOD	< LOD	90.1	53.6	17.7	65.9	1.87	1872	990
SLC7A3_26	Induction_0_normal_HEK WT-OE SLC7A3	µM	3.26	0.226	0.448	< LOD	< LOD	< LOD	0.695	< LOD	0.079	< LOD	< LOD	< LOD	< LOD	< LOD	< LOD	< LOD	< LOD	< LOD	< LOD	< LOD	< LOD	< LOD	< LOD	< LOD	< LOD	< LOD	< LOD	< LOD	< LOD	< LOD	< LOD	< LOD	< LOD	< LOD	< LOD	< LOD	< LOD	< LOD	< LOD	< LOD	101	44.7	20.6	71.8	2.12	1801	1059
SLC7A3_27	Induction_0_normal_HEK WT-OE SLC7A3	µM	3.29	0.228	0.492	< LOD	< LOD	< LOD	0.713	< LOD	0.105	< LOD	< LOD	< LOD	< LOD	< LOD	< LOD	< LOD	< LOD	< LOD	< LOD	< LOD	< LOD	< LOD	< LOD	< LOD	< LOD	< LOD	< LOD	< LOD	< LOD	< LOD	0.021	< LOD	< LOD	< LOD	< LOD	< LOD	< LOD	0.022	< LOD	< LOD	100	43.2	19.9	70.3	2.05	1857	1141
SLC7A3_28	Induction_0_normal_HEK WT-OE SLC7A3	µM	3.83	0.264	0.442	< LOD	< LOD	< LOD	0.866	< LOD	0.098	< LOD	< LOD	< LOD	< LOD	0.016	< LOD	< LOD	< LOD	< LOD	< LOD	< LOD	< LOD	< LOD	< LOD	< LOD	< LOD	< LOD	< LOD	< LOD	0.013	< LOD	< LOD	< LOD	< LOD	< LOD	< LOD	< LOD	< LOD	0.02	< LOD	< LOD	104	47.4	20.3	67.5	2.21	1993	1079
SLC7A3_29	Induction_0_normal_HEK WT-OE SLC7A3	µM	4.71	0.222	0.305	< LOD	< LOD	< LOD	0.773	< LOD	0.115	< LOD	< LOD	< LOD	< LOD	< LOD	< LOD	< LOD	< LOD	< LOD	< LOD	< LOD	< LOD	< LOD	< LOD	< LOD	< LOD	< LOD	< LOD	< LOD	< LOD	< LOD	< LOD	< LOD	< LOD	< LOD	< LOD	< LOD	< LOD	0.011	< LOD	< LOD	94.9	47.2	18.9	65	2.45	1937	1069
SLC7A3_30	Induction_0_normal_HEK WT-OE SLC7A3	µM	3.73	0.251	0.577	< LOD	< LOD	< LOD	0.939	< LOD	0.188	< LOD	< LOD	0.087	< LOD	< LOD	< LOD	< LOD	< LOD	< LOD	< LOD	< LOD	< LOD	< LOD	< LOD	< LOD	< LOD	< LOD	< LOD	< LOD	< LOD	< LOD	0.026	< LOD	< LOD	< LOD	< LOD	< LOD	< LOD	< LOD	< LOD	< LOD	101	47.1	20.6	72.7	2.66	1996	1160
SLC7A3_31	Induction_1_normal_HEK WT-OE SLC7A3	µM	4.1	< LOD	0.228	< LOD	< LOD	< LOD	0.642	< LOD	0.085	< LOD	< LOD	< LOD	< LOD	< LOD	< LOD	< LOD	< LOD	< LOD	< LOD	< LOD	< LOD	< LOD	< LOD	< LOD	< LOD	< LOD	< LOD	< LOD	< LOD	< LOD	< LOD	< LOD	< LOD	< LOD	< LOD	< LOD	< LOD	< LOD	< LOD	< LOD	93.6	140	19.1	75.2	2.51	1978	1015
SLC7A3_32	Induction_1_normal_HEK WT-OE SLC7A3	µM	3.48	0.207	0.301	< LOD	< LOD	< LOD	0.814	< LOD	0.106	< LOD	< LOD	< LOD	< LOD	0.023	< LOD	< LOD	< LOD	< LOD	< LOD	< LOD	< LOD	< LOD	< LOD	< LOD	< LOD	< LOD	< LOD	< LOD	< LOD	< LOD	< LOD	< LOD	< LOD	< LOD	< LOD	< LOD	< LOD	0.01	< LOD	< LOD	93.9	138	20.9	81.5	1.95	1998	1095
SLC7A3_33	Induction_1_normal_HEK WT-OE SLC7A3	µM	4.03	0.187	0.227	< LOD	< LOD	< LOD	0.653	< LOD	0.08	< LOD	< LOD	< LOD	< LOD	< LOD	< LOD	< LOD	< LOD	< LOD	< LOD	< LOD	< LOD	< LOD	< LOD	< LOD	< LOD	< LOD	< LOD	< LOD	< LOD	< LOD	< LOD	< LOD	< LOD	< LOD	< LOD	< LOD	< LOD	0.009	< LOD	< LOD	84.4	123	19.8	66.9	2.32	1724	964
SLC7A3_34	Induction_1_normal_HEK WT-OE SLC7A3	µM	3.88	0.196	0.232	< LOD	< LOD	< LOD	0.761	< LOD	0.078	< LOD	< LOD	< LOD	< LOD	< LOD	< LOD	< LOD	< LOD	< LOD	< LOD	< LOD	< LOD	< LOD	< LOD	< LOD	< LOD	< LOD	< LOD	< LOD	< LOD	< LOD	0.024	< LOD	< LOD	< LOD	< LOD	< LOD	< LOD	< LOD	< LOD	< LOD	92.7	139	23.3	95.1	1.82	1852	1089
SLC7A3_35	Induction_1_normal_HEK WT-OE SLC7A3	µM	2.98	0.194	0.29	< LOD	< LOD	< LOD	0.724	< LOD	0.085	< LOD	< LOD	< LOD	< LOD	< LOD	< LOD	< LOD	< LOD	< LOD	< LOD	< LOD	< LOD	< LOD	< LOD	< LOD	< LOD	< LOD	< LOD	< LOD	< LOD	< LOD	< LOD	< LOD	< LOD	< LOD	< LOD	< LOD	< LOD	0.022	< LOD	< LOD	84.5	108	18.9	70.5	1.79	1599	1045
SLC7A3_36	Induction_1_normal_HEK WT-OE SLC7A3	µM	3.18	0.277	0.273	< LOD	< LOD	< LOD	0.648	< LOD	0.102	< LOD	< LOD	< LOD	< LOD	< LOD	< LOD	< LOD	< LOD	< LOD	< LOD	< LOD	< LOD	< LOD	< LOD	< LOD	< LOD	< LOD	< LOD	< LOD	< LOD	< LOD	< LOD	< LOD	< LOD	< LOD	< LOD	< LOD	< LOD	0.015	< LOD	< LOD	95.8	147	20.5	73.8	2.89	2071	1040
LOD LC		0	0	0	0	0	0	0	0	0	0	0	0	0	0	0	0	0	0	0	0	0	0	0	0	0	0	0	0	0	0	0	0	0	0	0	0	0	0	0	0	1	0.5	1.5	1.5	1	1.5	2	0.5
LOD FIA calculated		2.23	0.181	0.08	0.122	0.05	0.03	0.115	0.03	0.059	0.035	0.137	0.084	0.036	0.014	0.093	0.071	0.035	0.352	0.028	0.258	1.28	0.04	0.145	0.166	0.737	0.103	0.006	0.037	0.01	0.015	0.018	0.015	0.06	0.023	0.018	0.03	0.02	0.008	0.023	0.018	0	0	0	0	0	0	0	0
[truncated: 138 more columns]

## Sheet: Results
Sample Identification	Sample Description	C0	C2	C3	C3-DC (C4-OH)	C3-OH	C3:1	C4	C4:1	C5	C5-DC (C6-OH)	C5-M-DC	C5-OH (C3-DC-M)	C5:1	C5:1-DC	C6 (C4:1-DC)	C6:1	C7-DC	C8	C9	C10	C10:1	C10:2	C12	C12-DC	C12:1	C14	C14:1	C14:1-OH	C14:2	C14:2-OH	C16	C16-OH	C16:1	C16:1-OH	C16:2	C16:2-OH	C18	C18:1	C18:1-OH	C18:2	Ala	Arg	Asn	Asp	Cit	Gln	Glu	Gly
103595_SLC7A3_25	Induction_0_normal_HEK WT-OE SLC7A3	3.7	0.287	0.325	< LOD	< LOD	< LOD	0.595	< LOD	0.099	< LOD	< LOD	< LOD	< LOD	< LOD	< LOD	< LOD	< LOD	< LOD	< LOD	< LOD	< LOD	< LOD	< LOD	< LOD	< LOD	< LOD	< LOD	< LOD	< LOD	< LOD	< LOD	< LOD	< LOD	< LOD	< LOD	< LOD	< LOD	0.015	< LOD	< LOD	90.1	53.6	17.7	65.9	1.87	1872	990	344
103596_SLC7A3_26	Induction_0_normal_HEK WT-OE SLC7A3	3.26	0.226	0.448	< LOD	< LOD	< LOD	0.695	< LOD	0.079	< LOD	< LOD	< LOD	< LOD	< LOD	< LOD	< LOD	< LOD	< LOD	< LOD	< LOD	< LOD	< LOD	< LOD	< LOD	< LOD	< LOD	< LOD	< LOD	< LOD	< LOD	< LOD	< LOD	< LOD	< LOD	< LOD	< LOD	< LOD	< LOD	< LOD	< LOD	101	44.7	20.6	71.8	2.12	1801	1059	347
103597_SLC7A3_27	Induction_0_normal_HEK WT-OE SLC7A3	3.29	0.228	0.492	< LOD	< LOD	< LOD	0.713	< LOD	0.105	< LOD	< LOD	< LOD	< LOD	< LOD	< LOD	< LOD	< LOD	< LOD	< LOD	< LOD	< LOD	< LOD	< LOD	< LOD	< LOD	< LOD	< LOD	< LOD	< LOD	< LOD	0.021	< LOD	< LOD	< LOD	< LOD	< LOD	< LOD	0.022	< LOD	< LOD	100	43.2	19.9	70.3	2.05	1857	1141	349
103598_SLC7A3_28	Induction_0_normal_HEK WT-OE SLC7A3	3.83	0.264	0.442	< LOD	< LOD	< LOD	0.866	< LOD	0.098	< LOD	< LOD	< LOD	< LOD	0.016	< LOD	< LOD	< LOD	< LOD	< LOD	< LOD	< LOD	< LOD	< LOD	< LOD	< LOD	< LOD	< LOD	< LOD	0.013	< LOD	< LOD	< LOD	< LOD	< LOD	< LOD	< LOD	< LOD	0.02	< LOD	< LOD	104	47.4	20.3	67.5	2.21	1993	1079	350
103599_SLC7A3_29	Induction_0_normal_HEK WT-OE SLC7A3	4.71	0.222	0.305	< LOD	< LOD	< LOD	0.773	< LOD	0.115	< LOD	< LOD	< LOD	< LOD	< LOD	< LOD	< LOD	< LOD	< LOD	< LOD	< LOD	< LOD	< LOD	< LOD	< LOD	< LOD	< LOD	< LOD	< LOD	< LOD	< LOD	< LOD	< LOD	< LOD	< LOD	< LOD	< LOD	< LOD	0.011	< LOD	< LOD	94.9	47.2	18.9	65	2.45	1937	1069	336
103600_SLC7A3_30	Induction_0_normal_HEK WT-OE SLC7A3	3.73	0.251	0.577	< LOD	< LOD	< LOD	0.939	< LOD	0.188	< LOD	< LOD	0.087	< LOD	< LOD	< LOD	< LOD	< LOD	< LOD	< LOD	< LOD	< LOD	< LOD	< LOD	< LOD	< LOD	< LOD	< LOD	< LOD	< LOD	< LOD	0.026	< LOD	< LOD	< LOD	< LOD	< LOD	< LOD	< LOD	< LOD	< LOD	101	47.1	20.6	72.7	2.66	1996	1160	373
103601_SLC7A3_31	Induction_1_normal_HEK WT-OE SLC7A3	4.1	< LOD	0.228	< LOD	< LOD	< LOD	0.642	< LOD	0.085	< LOD	< LOD	< LOD	< LOD	< LOD	< LOD	< LOD	< LOD	< LOD	< LOD	< LOD	< LOD	< LOD	< LOD	< LOD	< LOD	< LOD	< LOD	< LOD	< LOD	< LOD	< LOD	< LOD	< LOD	< LOD	< LOD	< LOD	< LOD	< LOD	< LOD	< LOD	93.6	140	19.1	75.2	2.51	1978	1015	346
103602_SLC7A3_32	Induction_1_normal_HEK WT-OE SLC7A3	3.48	0.207	0.301	< LOD	< LOD	< LOD	0.814	< LOD	0.106	< LOD	< LOD	< LOD	< LOD	0.023	< LOD	< LOD	< LOD	< LOD	< LOD	< LOD	< LOD	< LOD	< LOD	< LOD	< LOD	< LOD	< LOD	< LOD	< LOD	< LOD	< LOD	< LOD	< LOD	< LOD	< LOD	< LOD	< LOD	0.01	< LOD	< LOD	93.9	138	20.9	81.5	1.95	1998	1095	356
103603_SLC7A3_33	Induction_1_normal_HEK WT-OE SLC7A3	4.03	0.187	0.227	< LOD	< LOD	< LOD	0.653	< LOD	0.08	< LOD	< LOD	< LOD	< LOD	< LOD	< LOD	< LOD	< LOD	< LOD	< LOD	< LOD	< LOD	< LOD	< LOD	< LOD	< LOD	< LOD	< LOD	< LOD	< LOD	< LOD	< LOD	< LOD	< LOD	< LOD	< LOD	< LOD	< LOD	0.009	< LOD	< LOD	84.4	123	19.8	66.9	2.32	1724	964	311
103604_SLC7A3_34	Induction_1_normal_HEK WT-OE SLC7A3	3.88	0.196	0.232	< LOD	< LOD	< LOD	0.761	< LOD	0.078	< LOD	< LOD	< LOD	< LOD	< LOD	< LOD	< LOD	< LOD	< LOD	< LOD	< LOD	< LOD	< LOD	< LOD	< LOD	< LOD	< LOD	< LOD	< LOD	< LOD	< LOD	0.024	< LOD	< LOD	< LOD	< LOD	< LOD	< LOD	< LOD	< LOD	< LOD	92.7	139	23.3	95.1	1.82	1852	1089	347
103605_SLC7A3_35	Induction_1_normal_HEK WT-OE SLC7A3	2.98	0.194	0.29	< LOD	< LOD	< LOD	0.724	< LOD	0.085	< LOD	< LOD	< LOD	< LOD	< LOD	< LOD	< LOD	< LOD	< LOD	< LOD	< LOD	< LOD	< LOD	< LOD	< LOD	< LOD	< LOD	< LOD	< LOD	< LOD	< LOD	< LOD	< LOD	< LOD	< LOD	< LOD	< LOD	< LOD	0.022	< LOD	< LOD	84.5	108	18.9	70.5	1.79	1599	1045	293
103606_SLC7A3_36	Induction_1_normal_HEK WT-OE SLC7A3	3.18	0.277	0.273	< LOD	< LOD	< LOD	0.648	< LOD	0.102	< LOD	< LOD	< LOD	< LOD	< LOD	< LOD	< LOD	< LOD	< LOD	< LOD	< LOD	< LOD	< LOD	< LOD	< LOD	< LOD	< LOD	< LOD	< LOD	< LOD	< LOD	< LOD	< LOD	< LOD	< LOD	< LOD	< LOD	< LOD	0.015	< LOD	< LOD	95.8	147	20.5	73.8	2.89	2071	1040	349
p180_QC1		10.6	3.78	0.7	< LOD	< LOD	< LOD	0.686	< LOD	0.643	< LOD	< LOD	< LOD	< LOD	0.015	0.347	< LOD	< LOD	0.451	< LOD	0.523	< LOD	< LOD	0.498	< LOD	< LOD	0.695	0.116	< LOD	0.012	< LOD	0.674	< LOD	< LOD	< LOD	< LOD	< LOD	0.686	0.059	< LOD	0.054	365	130	18.8	14.5	26.8	319	167	267
p180_QC2		26.3	18.6	4.8	< LOD	< LOD	< LOD	3.7	0.043	3.91	< LOD	< LOD	< LOD	< LOD	0.037	1.82	< LOD	< LOD	2.89	0.042	2.12	< LOD	< LOD	4.53	< LOD	< LOD	2.1	0.129	< LOD	0.014	< LOD	4.25	< LOD	< LOD	< LOD	< LOD	< LOD	2.15	0.084	< LOD	0.058	725	229	145	142	153	738	374	943
p180_QC2		23.9	13.3	5.41	< LOD	< LOD	< LOD	4.13	0.052	3.39	< LOD	< LOD	< LOD	< LOD	< LOD	1.78	< LOD	0.051	3.58	0.032	1.9	< LOD	0.042	4.01	< LOD	< LOD	2.21	0.115	< LOD	0.027	< LOD	4.45	< LOD	< LOD	< LOD	< LOD	< LOD	1.91	0.102	< LOD	0.055	718	209	144	133	153	716	359	870
p180_QC2		22.9	15.7	5.06	< LOD	< LOD	< LOD	3.8	< LOD	4.17	< LOD	< LOD	< LOD	< LOD	0.021	1.74	< LOD	< LOD	2.89	0.034	1.86	< LOD	< LOD	4.07	< LOD	< LOD	2.22	0.115	< LOD	0.033	0.018	4.29	< LOD	< LOD	0.042	< LOD	< LOD	2.15	0.072	0.031	0.052	759	220	149	153	162	718	407	908
p180_QC3		36.6	25.4	8.82	< LOD	< LOD	< LOD	6.69	0.049	7.24	0.075	< LOD	< LOD	< LOD	0.022	3.72	< LOD	< LOD	6.93	0.038	3.1	< LOD	< LOD	7.36	< LOD	< LOD	3.64	0.104	< LOD	0.02	< LOD	7.3	< LOD	< LOD	< LOD	< LOD	< LOD	3.61	0.081	< LOD	0.048	1093	269	292	267	281	1033	536	1405
p180-UHPLC Cal1		0.165	< LOD	< LOD	< LOD	< LOD	< LOD	< LOD	< LOD	< LOD	< LOD	< LOD	< LOD	< LOD	< LOD	< LOD	< LOD	< LOD	< LOD	< LOD	< LOD	< LOD	< LOD	< LOD	< LOD	< LOD	< LOD	< LOD	< LOD	< LOD	< LOD	< LOD	< LOD	< LOD	< LOD	< LOD	< LOD	< LOD	< LOD	< LOD	< LOD	19.7	3.62	4.67	5	4.62	19.7	9.23	24.8
p180-UHPLC Cal2		0.209	< LOD	< LOD	< LOD	< LOD	< LOD	< LOD	< LOD	< LOD	< LOD	< LOD	< LOD	< LOD	< LOD	< LOD	< LOD	< LOD	< LOD	< LOD	< LOD	< LOD	< LOD	< LOD	< LOD	< LOD	< LOD	< LOD	< LOD	< LOD	< LOD	< LOD	< LOD	< LOD	< LOD	< LOD	< LOD	< LOD	< LOD	< LOD	< LOD	40	9.68	10.4	9.04	10.7	37.4	0	46.9
p180-UHPLC Cal3		0.188	< LOD	< LOD	< LOD	< LOD	< LOD	< LOD	< LOD	< LOD	< LOD	< LOD	< LOD	< LOD	< LOD	< LOD	< LOD	< LOD	< LOD	< LOD	< LOD	< LOD	< LOD	< LOD	< LOD	< LOD	< LOD	< LOD	< LOD	< LOD	< LOD	< LOD	< LOD	< LOD	< LOD	< LOD	< LOD	< LOD	< LOD	< LOD	< LOD	208	54	51.7	52.5	47.2	194	103	236
p180-UHPLC Cal4		0.19	< LOD	< LOD	< LOD	< LOD	< LOD	< LOD	< LOD	< LOD	< LOD	< LOD	< LOD	< LOD	< LOD	< LOD	< LOD	< LOD	< LOD	< LOD	< LOD	< LOD	< LOD	< LOD	< LOD	< LOD	< LOD	< LOD	< LOD	< LOD	< LOD	< LOD	< LOD	< LOD	< LOD	< LOD	< LOD	< LOD	< LOD	< LOD	< LOD	396	122	99.1	110	106	431	211	547
p180-UHPLC Cal5		0.197	< LOD	< LOD	< LOD	< LOD	< LOD	< LOD	< LOD	< LOD	< LOD	< LOD	< LOD	< LOD	< LOD	< LOD	< LOD	< LOD	< LOD	< LOD	< LOD	< LOD	< LOD	< LOD	< LOD	< LOD	< LOD	< LOD	< LOD	< LOD	< LOD	< LOD	< LOD	< LOD	< LOD	< LOD	< LOD	< LOD	< LOD	< LOD	< LOD	783	233	207	193	199	898	401	1130
p180-UHPLC Cal6		0.279	< LOD	< LOD	< LOD	< LOD	< LOD	< LOD	< LOD	< LOD	< LOD	< LOD	< LOD	< LOD	< LOD	< LOD	< LOD	< LOD	< LOD	< LOD	< LOD	< LOD	< LOD	< LOD	< LOD	< LOD	< LOD	< LOD	< LOD	< LOD	< LOD	< LOD	< LOD	< LOD	< LOD	< LOD	< LOD	< LOD	< LOD	< LOD	< LOD	1180	282	283	294	310	1123	610	1397
p180-UHPLC Cal7		0.291	< LOD	< LOD	< LOD	< LOD	< LOD	< LOD	< LOD	< LOD	< LOD	< LOD	< LOD	< LOD	< LOD	< LOD	< LOD	< LOD	< LOD	< LOD	< LOD	< LOD	< LOD	< LOD	< LOD	< LOD	< LOD	< LOD	< LOD	< LOD	< LOD	< LOD	< LOD	< LOD	< LOD	< LOD	< LOD	< LOD	< LOD	< LOD	< LOD	1634	360	409	401	388	1557	776	1945
PBS		< LOD	< LOD	< LOD	< LOD	< LOD	< LOD	< LOD	< LOD	< LOD	< LOD	< LOD	< LOD	< LOD	< LOD	< LOD	< LOD	< LOD	< LOD	< LOD	< LOD	< LOD	< LOD	< LOD	< LOD	< LOD	< LOD	< LOD	< LOD	< LOD	< LOD	< LOD	< LOD	< LOD	< LOD	< LOD	< LOD	< LOD	< LOD	< LOD	< LOD	< LOD	< LOD	< LOD	< LOD	< LOD	< LOD	< LOD	< LOD
PBS		< LOD	< LOD	< LOD	< LOD	< LOD	< LOD	< LOD	< LOD	< LOD	< LOD	< LOD	< LOD	< LOD	< LOD	< LOD	< LOD	< LOD	< LOD	< LOD	< LOD	< LOD	< LOD	< LOD	< LOD	< LOD	< LOD	< LOD	< LOD	< LOD	< LOD	< LOD	< LOD	< LOD	< LOD	< LOD	< LOD	< LOD	< LOD	< LOD	< LOD	< LOD	< LOD	< LOD	< LOD	< LOD	< LOD	< LOD	< LOD
PBS		< LOD	< LOD	< LOD	< LOD	< LOD	< LOD	< LOD	< LOD	< LOD	< LOD	< LOD	< LOD	0.038	< LOD	< LOD	< LOD	< LOD	< LOD	< LOD	< LOD	< LOD	< LOD	< LOD	< LOD	< LOD	< LOD	< LOD	< LOD	< LOD	< LOD	< LOD	< LOD	< LOD	< LOD	< LOD	< LOD	< LOD	0.008	< LOD	< LOD	< LOD	< LOD	< LOD	< LOD	< LOD	< LOD	< LOD	< LOD
		acylcarnitines	acylcarnitines	acylcarnitines	acylcarnitines	acylcarnitines	acylcarnitines	acylcarnitines	acylcarnitines	acylcarnitines	acylcarnitines	acylcarnitines	acylcarnitines	acylcarnitines	acylcarnitines	acylcarnitines	acylcarnitines	acylcarnitines	acylcarnitines	acylcarnitines	acylcarnitines	acylcarnitines	acylcarnitines	acylcarnitines	acylcarnitines	acylcarnitines	acylcarnitines	acylcarnitines	acylcarnitines	acylcarnitines	acylcarnitines	acylcarnitines	acylcarnitines	acylcarnitines	acylcarnitines	acylcarnitines	acylcarnitines	acylcarnitines	acylcarnitines	acylcarnitines	acylcarnitines	aminoacids	aminoacids	aminoacids	aminoacids	aminoacids	aminoacids	aminoacids	aminoacids
		0	0	0	0	0	0	0	0	0	0	0	0	0	0	0	0	0	0	0	0	0	0	0	0	0	0	0	0	0	0	0	0	0	0	0	0	0	0	0	0	1	0.5	1.5	1.5	1	1.5	2	0.5
		2.23	0.181	0.08	0.122	0.05	0.03	0.115	0.03	0.059	0.035	0.137	0.084	0.036	0.014	0.093	0.071	0.035	0.352	0.028	0.258	1.28	0.04	0.145	0.166	0.737	0.103	0.006	0.037	0.01	0.015	0.018	0.015	0.06	0.023	0.018	0.03	0.02	0.008	0.023	0.018	0	0	0	0	0	0	0	0
																																										1600	400	400	400	400	1600	800	2000
		120	35	15	0	0	0	12	0	12	0	0	0	0	0	0	0	0	8	0	6	0	0	12	0	0	6	0	0	0	0	12	0	0	0	0	0	6	0	0	0
																																										20	5	5	5	5	20	10	25
		5	0.4	0.4	0	0	0	0.4	0	0.4	0	0	0	0	0	0	0	0	0.2	0	0.3	0	0	0.4	0	0	0.4	0	0	0	0	0.4	0	0	0	0	0	0.4	0	0	0
																																										KIT2-0-8015	KIT2-0-8015	KIT2-0-8015	KIT2-0-8015	KIT2-0-8015	KIT2-0-8015	KIT2-0-8015	KIT2-0-8015
		KIT3-0-8015	KIT3-0-8015	KIT3-0-8015	KIT3-0-8015	KIT3-0-8015	KIT3-0-8015	KIT3-0-8015	KIT3-0-8015	KIT3-0-8015	KIT3-0-8015	KIT3-0-8015	KIT3-0-8015	KIT3-0-8015	KIT3-0-8015	KIT3-0-8015	KIT3-0-8015	KIT3-0-8015	KIT3-0-8015	KIT3-0-8015	KIT3-0-8015	KIT3-0-8015	KIT3-0-8015	KIT3-0-8015	KIT3-0-8015	KIT3-0-8015	KIT3-0-8015	KIT3-0-8015	KIT3-0-8015	KIT3-0-8015	KIT3-0-8015	KIT3-0-8015	KIT3-0-8015	KIT3-0-8015	KIT3-0-8015	KIT3-0-8015	KIT3-0-8015	KIT3-0-8015	KIT3-0-8015	KIT3-0-8015	KIT3-0-8015
		Quantitative	Quantitative	Quantitative	Relative Quantitative	Relative Quantitative	Relative Quantitative	Quantitative	Relative Quantitative	Quantitative	Relative Quantitative	Relative Quantitative	Relative Quantitative	Relative Quantitative	Relative Quantitative	Quantitative	Relative Quantitative	Relative Quantitative	Quantitative	Relative Quantitative	Quantitative	Relative Quantitative	Relative Quantitative	Quantitative	Relative Quantitative	Relative Quantitative	Quantitative	Relative Quantitative	Relative Quantitative	Relative Quantitative	Relative Quantitative	Quantitative	Relative Quantitative	Relative Quantitative	Relative Quantitative	Relative Quantitative	Relative Quantitative	Quantitative	Relative Quantitative	Relative Quantitative	Relative Quantitative
[truncated: 137 more columns]
